# Supplementary material for: Pt( ii )-coordinated tricomponent self-assemblies of tetrapyridyl porphyrin and dicarboxylate ligands: are they 3D prisms or 2D bow-ties?
Source: Royal Society of Chemistry journal article supplement (doi:10.1039/d1sc06533e), 2022-01-01
Supplement: d1sc06533e1.pdf [file d1sc06533e1.pdf]

## Electronic Supplementary Information

### **Pt(II)-Coordinated Tricomponent Self-Assemblies of Tetrapyrridyl Porphyrin and Dicarboxylate Ligands: Are They 3D Prisms or 2D Bow Ties?†**

Paola A. Benavides,<sup>a</sup> Monica A. Gordillo,<sup>a</sup> Ashok Yadav,<sup>a</sup> M. Andrey Joaqui-Joaqui,<sup>b</sup> and Sourav Saha<sup>a,\*</sup>

<sup>a</sup>Department of Chemistry, Clemson University, Clemson, South Carolina 29634, United States

<sup>b</sup>Department of Chemistry, University of Minnesota, Minneapolis, MN 55455, United States

\*Email: [souravs@clemson.edu](mailto:souravs@clemson.edu)

#### Table of Contents

|                                                                                                                                                |        |
|------------------------------------------------------------------------------------------------------------------------------------------------|--------|
| General Materials and Methods                                                                                                                  | S2     |
| Synthesis and Characterization of Bow Tie Complexes                                                                                            | S2     |
| <b>Fig. S1.</b> <sup>31</sup> P NMR spectra of <i>cis</i> -(Et <sub>3</sub> P) <sub>2</sub> Pt(TfO) <sub>2</sub> and <b>BT1–BT4'</b> complexes | S4     |
| <b>Fig. S2.</b> Partial <sup>1</sup> H NMR spectra free H <sub>2</sub> TPP and <b>BT1'–BT4'</b> complexes                                      | S4     |
| <b>Fig. S3.</b> <sup>1</sup> H NMR spectra of <b>BT1–BT4</b> and <b>BT1'–BT4'</b> complexes                                                    | S5–8   |
| <b>Fig. S4.</b> <sup>1</sup> H– <sup>1</sup> H COSY NMR spectra of <b>BT1–BT4</b> and <b>BT1'–BT4'</b> complexes                               | S9     |
| <b>Fig. S5.</b> <sup>1</sup> H– <sup>1</sup> H ROESY NMR spectra of <b>BT1'–BT4'</b> complexes                                                 | S10    |
| <b>Fig. S6.</b> DOSY NMR spectra bow-tie complexes                                                                                             | S10    |
| <b>Fig. S7.</b> ESI-MS data of bow tie complexes                                                                                               | S11–14 |
| <b>Fig. S8.</b> Association constant calculation of <b>BT4•HATHCN</b> complex                                                                  | S14    |
| <b>Fig. S9.</b> <sup>31</sup> P NMR spectrum of the <b>BT4</b> and <b>BT4•HATHCN</b> complex                                                   | S15    |
| <b>Fig. S10.</b> ESI-MS data of the 1:1 <b>BT4•HATHCN</b> complex                                                                              | S15    |
| <b>Fig. S11.</b> Cyclic voltammograms                                                                                                          | S15    |
| Crystallographic Data                                                                                                                          | S16    |
| References                                                                                                                                     | S97    |

## General Materials and Methods

Reagents, starting materials, and solvents were purchased from Sigma-Aldrich, Acros Organic and TCI America. *cis*-Pt(PET<sub>3</sub>)<sub>2</sub>(OTf)<sub>2</sub> and ZnTPP were prepared following reported procedures.<sup>1,2</sup>

The <sup>1</sup>H, COSY, and ROESY NMR spectra were recorded on a Bruker NEO 500 MHz NMR spectrometers. For ROESY, a mixing time of 491 ms was employed for all samples. The <sup>31</sup>P NMR spectra was recorded at 122 MHz using the same instrument. The DOSY NMR spectra were recorded using a gradient duration of 1 ms and a diffusion delay of 0.1 s. Diffusion coefficient values (D) were calculated from the TOPSPIN software and the hydrodynamic radii (r<sub>H</sub>) was calculated using Stokes-Einstein equation at *T* = 298 K.

The electrochemical measurements were conducted on a Princeton Applied Research VersaStat-3-450 instrument using a glassy carbon working electrode, Ag/AgCl reference electrode, Pt counter electrode, and a 0.1 M of Bu<sub>4</sub>N<sup>+</sup>TfO<sup>-</sup>/CH<sub>2</sub>Cl<sub>2</sub> solution as supporting electrolyte.

UV-vis absorption spectra were recorded in a Shimadzu UV-2600 spectrophotometer equipped with an integrated sphere (200–1100 nm range).

Electrospray ionization mass spectra (ESIMS) were recorded on a Bruker BioTOF II ESI/TOF-MS instrument at the Waters Center for Innovation in Mass Spectrometry of the Department of Chemistry at the University of Minnesota, Twin Cities.

The single crystal X-ray diffraction (SXRD) data were collected on a Bruker D8 Venture dual source diffractometer equipped with Cu and Mo radiation sources and CMOS detector. The crystal structures of bow tie complexes were solved and refined by using Bruker SHELXTL software package. The crystals of some bow tie complexes diffracted poorly, and the ethyl groups on Et<sub>3</sub>P ligands were highly disordered due to thermal motions. These disordered ethyl groups were fixed by using the DFIX, DANG commands. In addition, the coordination of bridging XDC linkers with two Pt(II) corners also created strain and made them slightly bend and disordered in **BT3**, **BT3'**, and **BT4**. AFIX and DFIX commands were applied to fix these issues. The highly disordered triflate anions were hard to assign and omitted by PLATON/SQUEEZE in some cases, while in other cases they were assigned fully/partially using SAME/SIMU commands. ISOR and RIGU commands were applied for the atoms that were not behaving well isothermally. A SHEL cut-off was applied to remove the weak reflections in most of the structures. The disordered solvent molecules were also removed by PLATON/SQUEEZE model. The significant amount of disorder and weak diffraction of some crystals resulted in several A- and B-alerts, which have been addressed properly in the corresponding checkCIFs, while the commands applied to fix the disordered atoms and groups caused large R-values in those cases. Nevertheless, the basic bow tie skeletons of all complexes were well resolved and the disordered Et<sub>3</sub>P groups, counter anions, and solvent molecules had practically no impact on the overall shape and geometry of these complexes.

The geometry optimized structures were calculated with semi-empirical methods using PM6 model on Gaussian software version 09.

## Synthesis and Characterization

**Dicarboxylate (XDC) Ligands.** In general, aqueous solutions of 2.5 equiv. of KOH was added to respective dicarboxylic acids (i.e., hexane-, 4,4'-biphenyl, 1,4-benzene-, and 2,6-naphthalene dicarboxylic acids) and the resulting mixtures were stirred until the solids were fully solubilized due to salt formation. At this point, MeOH was added to the solution mixtures, which led to the precipitation of dipotassium dicarboxylate salts. The resulting solids were filtrated, washed thoroughly with cold MeOH, and recrystallized from MeOH, to remove excess of KOH and obtain pure products.

**General Protocol of Tricomponent Self-Assembly of *cis*-Pt(Et<sub>3</sub>P)<sub>2</sub>(TfO)<sub>2</sub>, M'TPP, and XDC.** The supramolecular coordination complexes were prepared following previously reported procedures.<sup>3</sup> Briefly, to a mixture of *cis*-Pt(PET<sub>3</sub>)<sub>2</sub>(OTf)<sub>2</sub> (4 equiv.), M'TPP (M' = Zn or H<sub>2</sub>, 1 equiv.), and XDC (XDC = HDC, BPDC, BDC, and NDC, 2 equiv.) placed in a 20 mL screw-capped glass was added a 1:1:1

CH<sub>2</sub>Cl<sub>2</sub>/MeNO<sub>2</sub>/MeCN (or 1:1 (CH<sub>3</sub>)<sub>2</sub>CO/H<sub>2</sub>O) solvent mixture (5mL). The reaction mixtures were then stirred at 60 °C overnight. After allowing the reaction mixtures to cool down to room temperature, Et<sub>2</sub>O was added to the filtrates and the resulting precipitates were collected by centrifugation. This washing process was repeated three times to obtain pure tricomponent bow tie complexes **BT1–BT4** containing ZnTPP and **BT1'–BT4'** containing H<sub>2</sub>TPP cores.

**BT1.** *cis*-Pt(PEt<sub>3</sub>)<sub>2</sub>(OTf)<sub>2</sub> (4.49 mg, 0.0059 mmol), ZnTPP (1.0 mg, 0.00147 mmol), and HDC (0.64 mg, 0.0029 mmol) in a 1:1:1 DCM/MeNO<sub>2</sub>/MeCN solvent mixture (1 mL). Yield = 4.5 mg (93%). <sup>1</sup>H NMR (500 MHz, acetone-*d*<sub>6</sub>) δ = 9.28 (br s, 8H, H<sub>a</sub>), 9.18 (s, 4H, H<sub>c'</sub>), 8.50 (d, *J* = 5.8 Hz, 8H, H<sub>b</sub>), 8.38 (s, 4H, H<sub>c</sub>), 2.33 – 2.15 (m, 56H, H<sub>s</sub> and H<sub>CH<sub>2</sub></sub>), 1.65 (br s, 8H, H<sub>i</sub>), 1.51 – 1.36 (m, 72H, H<sub>CH<sub>3</sub></sub>) ppm. <sup>31</sup>P NMR (202 MHz, acetone-*d*<sub>6</sub>) δ 6.23 (d, *J* = 20.5 Hz), 0.23 (d, *J* = 21.0 Hz). ESI-MS (*m/z*) Calculated for C<sub>102</sub>H<sub>160</sub>F<sub>6</sub>N<sub>8</sub>O<sub>14</sub>P<sub>8</sub>Pt<sub>4</sub>S<sub>2</sub>Zn [M–2TfO]<sup>2+</sup>: 1497.14. Found: 1497.09.

**BT2.** *cis*-Pt(PEt<sub>3</sub>)<sub>2</sub>(OTf)<sub>2</sub> (14.10 mg, 0.019 mmol), ZnTPP (3.30 mg, 0.0048 mmol), and BPDC (3.08 mg, 0.0096 mmol) in a 1:1:1 DCM/MeNO<sub>2</sub>/MeCN (or 1:1 (CH<sub>3</sub>)<sub>2</sub>CO/H<sub>2</sub>O) solvent mixture (5 mL). Yield = 16.02 mg (95%). <sup>1</sup>H NMR (500 MHz, acetone-*d*<sub>6</sub>) δ = 9.28 (br s, 8H, H<sub>a</sub>), 8.58 (s, 4H, H<sub>c'</sub>), 8.38 (d, *J* = 5.6 Hz, 8H, H<sub>b</sub>), 8.10 (d, *J* = 8.1 Hz, 8H, H<sub>u</sub>), 7.98 (d, *J* = 8.2 Hz, 8H, H<sub>v</sub>), 7.74 (s, 4H, H<sub>c</sub>), 2.44 – 2.18 (m, 48H, H<sub>CH<sub>2</sub></sub>), 1.58 – 1.42 (m, 72H, H<sub>CH<sub>3</sub></sub>). <sup>31</sup>P NMR (122 MHz, acetone-*d*<sub>6</sub>) δ 6.83 (d, *J* = 20.6 Hz), 1.78 (d, *J* = 21.2 Hz). ESI-MS (*m/z*) Calculated for C<sub>118</sub>H<sub>160</sub>F<sub>6</sub>N<sub>8</sub>O<sub>14</sub>P<sub>8</sub>Pt<sub>4</sub>S<sub>2</sub>Zn [M–2TfO]<sup>2+</sup> 1593.23, Found: 1593.58.

**BT3.** *cis*-Pt(PEt<sub>3</sub>)<sub>2</sub>(OTf)<sub>2</sub> (14.10 mg, 0.019 mmol), BDC (2.34 mg, 0.0096 mmol) and ZnTPP (3.30 mg, 0.0048 mmol) in a 1:1:1 DCM/MeNO<sub>2</sub>/MeCN (or 1:1 (CH<sub>3</sub>)<sub>2</sub>CO/H<sub>2</sub>O) solvent mixture (5 mL). Yield = 14.83 mg (92%). <sup>1</sup>H NMR (500 MHz, acetone-*d*<sub>6</sub>) δ = 9.35 (br s, 8H, H<sub>a</sub>), 9.16 (s, 4H, H<sub>c'</sub>), 8.36 (d, *J* = 6.3 Hz, 8H, H<sub>b</sub>), 8.09 (s, 8H, H<sub>w</sub>), 7.13 (s, 4H, H<sub>c</sub>), 2.40 – 2.19 (m, 48H, H<sub>CH<sub>2</sub></sub>), 1.57 – 1.41 (m, 72H, H<sub>CH<sub>3</sub></sub>) ppm. <sup>31</sup>P NMR (203 MHz, acetone-*d*<sub>6</sub>) δ = 6.02 (d, *J* = 20.5 Hz), 1.01 (d, *J* = 21.4 Hz) ppm. ESI-MS (*m/z*) Calculated for C<sub>106</sub>H<sub>152</sub>F<sub>6</sub>N<sub>8</sub>O<sub>14</sub>P<sub>8</sub>Pt<sub>4</sub>S<sub>2</sub>Zn [M–2TfO]<sup>2+</sup>: 1517.13. Found: 1517.01.

**BT4.** *cis*-Pt(PEt<sub>3</sub>)<sub>2</sub>(OTf)<sub>2</sub> (14.10 mg, 0.019 mmol), BDC (2.83 mg, 0.0096 mmol) and ZnTPP (3.30 mg, 0.0048 mmol) in a 1:1:1 DCM/MeNO<sub>2</sub>/MeCN (or 1:1 (CH<sub>3</sub>)<sub>2</sub>CO/H<sub>2</sub>O) solvent mixture (5 mL). Yield = 15.78 mg (95%). <sup>1</sup>H NMR (500 MHz, acetone-*d*<sub>6</sub>) δ = 9.37 (br s, 8H, H<sub>a</sub>), 8.86 (s, 4H, H<sub>c'</sub>), 8.71 (s, 4H, H<sub>x</sub>), 8.26 (d, *J* = 5.6 Hz, 8H, H<sub>b</sub>), 8.16 (d, *J* = 8.3 Hz, 4H, H<sub>y</sub>), 8.09 (d, *J* = 8.4 Hz, 4H, H<sub>z</sub>), 6.79 (s, 4H, H<sub>c</sub>), 2.35 – 2.24 (m, 48H, H<sub>CH<sub>2</sub></sub>), 1.49 (m, 72H, H<sub>CH<sub>3</sub></sub>) ppm. <sup>31</sup>P NMR (203 MHz, acetone-*d*<sub>6</sub>) δ = 6.13 (d, *J* = 21.0 Hz), 1.09 (d, *J* = 20.8 Hz) ppm. ESI-MS (*m/z*) Calculated for C<sub>114</sub>H<sub>156</sub>F<sub>6</sub>N<sub>8</sub>O<sub>14</sub>P<sub>8</sub>Pt<sub>4</sub>S<sub>2</sub>Zn [M–2TfO]<sup>2+</sup>: 1567.19. Found: 1567.05.

**BT1'.** *cis*-Pt(PEt<sub>3</sub>)<sub>2</sub>(OTf)<sub>2</sub> (4.47 mg, 0.0064 mmol), HDC (0.72 mg, 0.0032 mmol) and TPP (1.0 mg, 0.00162 mmol) in a 1:1:1 DCM/MeNO<sub>2</sub>/MeCN solvent mixture (1 mL). Yield = 4.7 mg (91%). <sup>1</sup>H NMR (500 MHz, acetone-*d*<sub>6</sub>) δ = 9.39 (br s, 4H, H<sub>c'</sub>), 9.37 – 9.31 (m, 8H, H<sub>a</sub>), 8.59 (d, *J* = 6.4 Hz, 8H, H<sub>b</sub>), 8.37 (s, 4H, H<sub>c</sub>), 2.40 – 2.16 (m, 56H, H<sub>s</sub> and H<sub>CH<sub>2</sub></sub>), 1.66 (br s, 8H, H<sub>i</sub>), 1.55 – 1.36 (m, 72H, H<sub>CH<sub>3</sub></sub>), –2.97 (s, 2H, H<sub>d</sub>). <sup>31</sup>P NMR (203 MHz, acetone-*d*<sub>6</sub>) δ = 6.27 (d, *J* = 21.1 Hz), 0.26 (d, *J* = 21.2 Hz) ppm.

**BT2'.** *cis*-Pt(PEt<sub>3</sub>)<sub>2</sub>(OTf)<sub>2</sub> (14.1 mg, 0.019 mmol), BPDC (3.08 mg, 0.0096 mmol) and TPP (3.0 mg, 0.0048 mmol) in a 1:1:1 DCM/MeNO<sub>2</sub>/MeCN (or 1:1 (CH<sub>3</sub>)<sub>2</sub>CO/H<sub>2</sub>O) solvent mixture (5 mL). Yield = 14.94 mg (90%). <sup>1</sup>H NMR (500 MHz, acetone-*d*<sub>6</sub>) δ = 9.34 (brs, 8H, H<sub>a</sub>), 8.58 (s, 4H, H<sub>c'</sub>), 8.38 (d, *J* = 5.6 Hz, 8H, H<sub>b</sub>), 8.10 (d, *J* = 8.1 Hz, 8H, H<sub>u</sub>), 7.98 (d, *J* = 8.2 Hz, 8H, H<sub>v</sub>), 7.74 (s, 4H, H<sub>c</sub>), 2.44 – 2.18 (m, 48H, H<sub>CH<sub>2</sub></sub>), 1.58 – 1.42 (m, 72H, H<sub>CH<sub>3</sub></sub>), –3.31 (s, 2H, H<sub>d</sub>). <sup>31</sup>P NMR (202 MHz, acetone-*d*<sub>6</sub>) δ = 6.37 (d, *J* = 21.0 Hz), 1.28 (d, *J* = 21.2 Hz) ppm. ESI-MS (*m/z*) Calculated for C<sub>118</sub>H<sub>162</sub>F<sub>6</sub>N<sub>8</sub>O<sub>14</sub>P<sub>8</sub>Pt<sub>4</sub>S<sub>2</sub> [M–2TfO]<sup>2+</sup>: 1561.55. Found: 1561.60.

**BT3'.** *cis*-Pt(PEt<sub>3</sub>)<sub>2</sub>(OTf)<sub>2</sub> (14.10 mg, 0.019 mmol), BDC (2.34 mg, 0.0096 mmol) and TPP (3.0 mg, 0.0048 mmol) in a 1:1:1 DCM/MeNO<sub>2</sub>/MeCN (or 1:1 (CH<sub>3</sub>)<sub>2</sub>CO/H<sub>2</sub>O) solvent mixture (5 mL). Yield = 14.75 mg (93%). <sup>1</sup>H NMR (500 MHz, acetone-*d*<sub>6</sub>) δ = 9.40 (d, *J* = 6.1 Hz, 8H, H<sub>a</sub>), 9.31 (s, 4H, H<sub>c'</sub>), 8.43 (d, *J* = 5.5

Hz, 8H, H<sub>b</sub>), 8.08 (s, 8H, H<sub>w</sub>), 7.08 (s, 4H, H<sub>c'</sub>), 2.40 – 2.18 (m, 48H, H<sub>CH2-</sub>), 1.61 – 1.38 (m, 72H, H<sub>CH3</sub>), –3.27 (s, 2H, H<sub>d</sub>) ppm. <sup>31</sup>P NMR (122 MHz, acetone-*d*<sub>6</sub>) δ = 6.73 (d, *J* = 20.6 Hz), 1.73 (d, *J* = 21.2 Hz) ppm. ESI-MS (*m/z*) Calculated for C<sub>106</sub>H<sub>154</sub>F<sub>6</sub>N<sub>8</sub>O<sub>14</sub>P<sub>8</sub>Pt<sub>4</sub>S<sub>2</sub> [M–2TfO]<sup>2+</sup>: 1485.45. Found: 1485.52.

**BT4'**. *cis*-Pt(PEt<sub>3</sub>)<sub>2</sub>(OTf)<sub>2</sub> (14.10 mg, 0.019 mmol), BDC (2.83 mg, 0.0096 mmol) and TPP (3.0 mg, 0.0048 mmol) in a 1:1:1 DCM/MeNO<sub>2</sub>/MeCN (or 1:1 (CH<sub>3</sub>)<sub>2</sub>CO/H<sub>2</sub>O) solvent mixture (5 mL). Yield = 14.70 mg (90%). <sup>1</sup>H NMR (500 MHz, CD<sub>3</sub>NO<sub>2</sub>) δ = 9.33 (br s, 8H, H<sub>a</sub>), 8.88 (s, 4H, H<sub>c''</sub>), 8.73 (d, *J* = 1.6 Hz, 4H, H<sub>x</sub>), 8.28 (d, *J* = 5.5 Hz, 8H, H<sub>b</sub>), 8.18 (d, *J* = 8.3 Hz, 4H, H<sub>y</sub>), 8.11 (d, *J* = 8.4 Hz, 4H, H<sub>z</sub>), 6.80 (s, 4H, H<sub>c'</sub>), 2.29 (m, 48H, H<sub>CH2-</sub>), 1.53 (m, 72H, H<sub>CH3</sub>), –3.42 (s, 2H, H<sub>d</sub>) ppm. <sup>31</sup>P NMR (203 MHz, CD<sub>3</sub>NO<sub>2</sub>) δ = 6.52 (d, *J* = 21.2 Hz), 1.07 (d, *J* = 21.1 Hz) ppm. ESI-MS (*m/z*) Calculated for C<sub>114</sub>H<sub>158</sub>F<sub>6</sub>N<sub>8</sub>O<sub>14</sub>P<sub>8</sub>Pt<sub>4</sub>S<sub>2</sub> [M–2TfO]<sup>2+</sup>: 1535.51. Found: 1535.60.

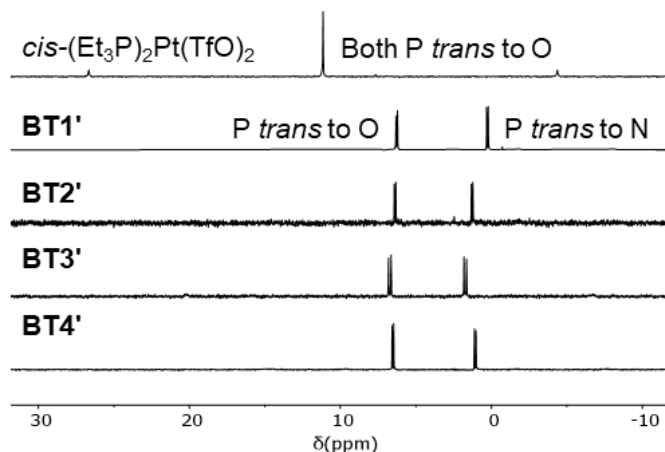

**Fig. S1.** The <sup>31</sup>P NMR spectra (122 MHz, acetone-*d*<sub>6</sub>) of *cis*-(Et<sub>3</sub>P)<sub>2</sub>Pt(TfO), BT1', BT2', BT3', and BT4' complexes reveal simultaneous coordination of carboxylate and pyridyl groups with heteroligated Pt(N,O) corners in the bow tie complexes.

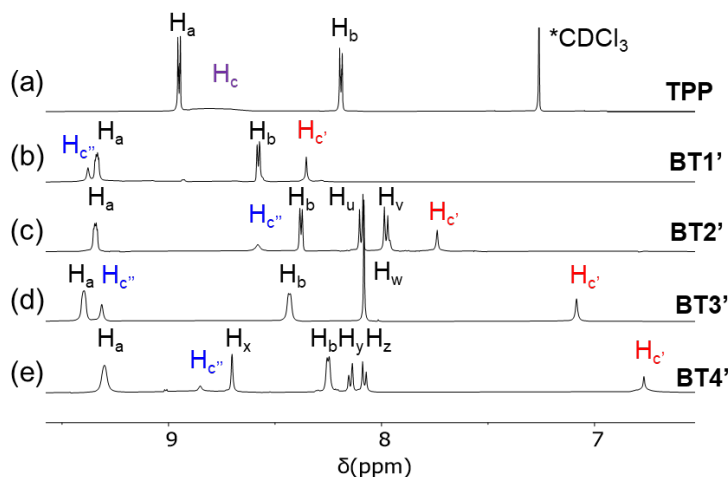

**Fig. S2.** The partial <sup>1</sup>H NMR spectra (500 MHz) of (a) free H<sub>2</sub>TPP ligand (in CDCl<sub>3</sub>), (b) BT1', (c) BT2', (d) BT3', and (e) BT4' complexes (in acetone-*d*<sub>6</sub>) show that the enclosed H<sub>c'</sub> pyrrole protons (highlighted in red) of bow tie complexes are shifted up-field commensurately with the shielding effect of the adjacent XDC linkers, whereas the chemical shifts of exposed H<sub>c''</sub> pyrrole protons (highlighted in blue) vary depending on the length of XDC linkers that dictate their distances from the adjacent pyridyl rings.

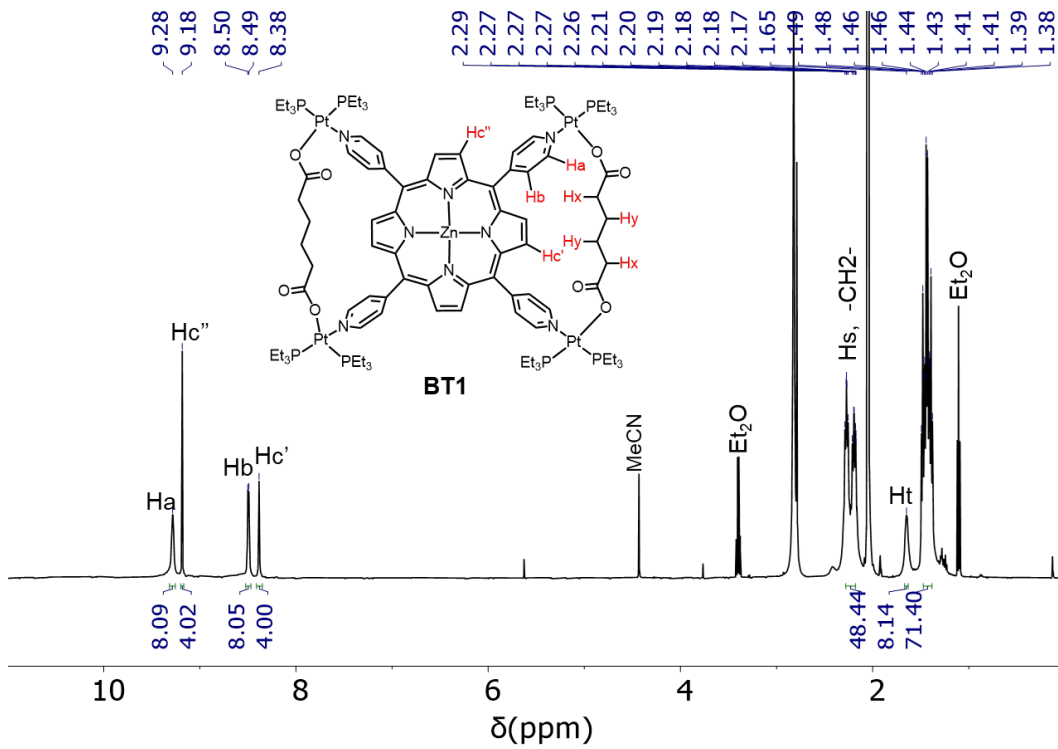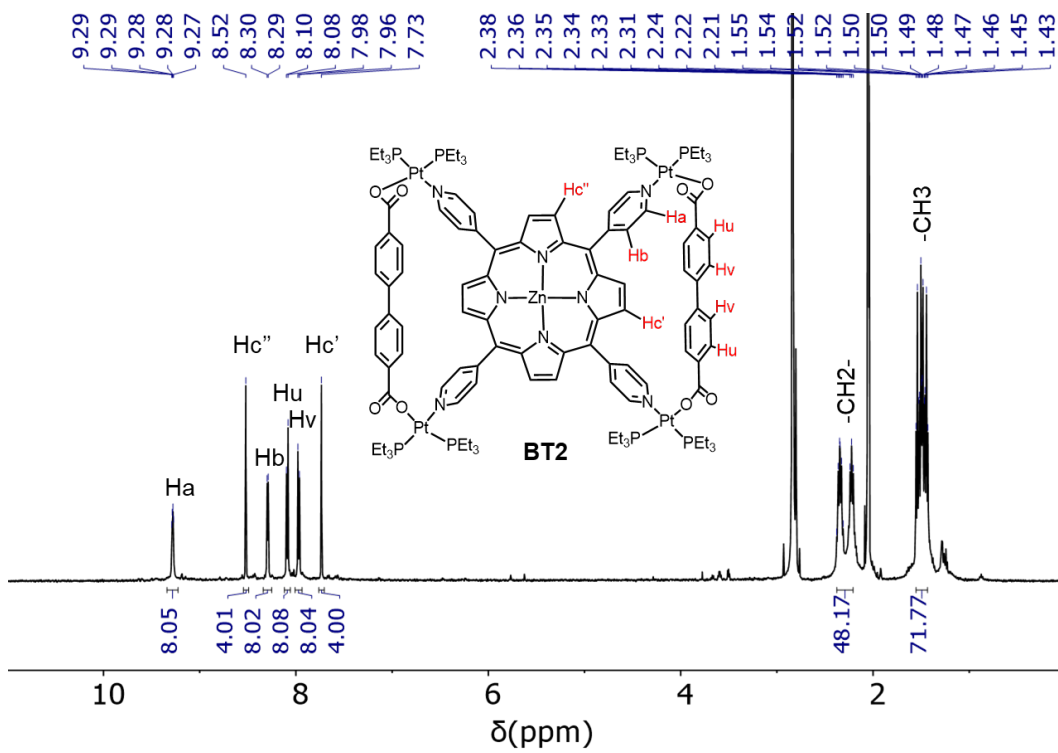

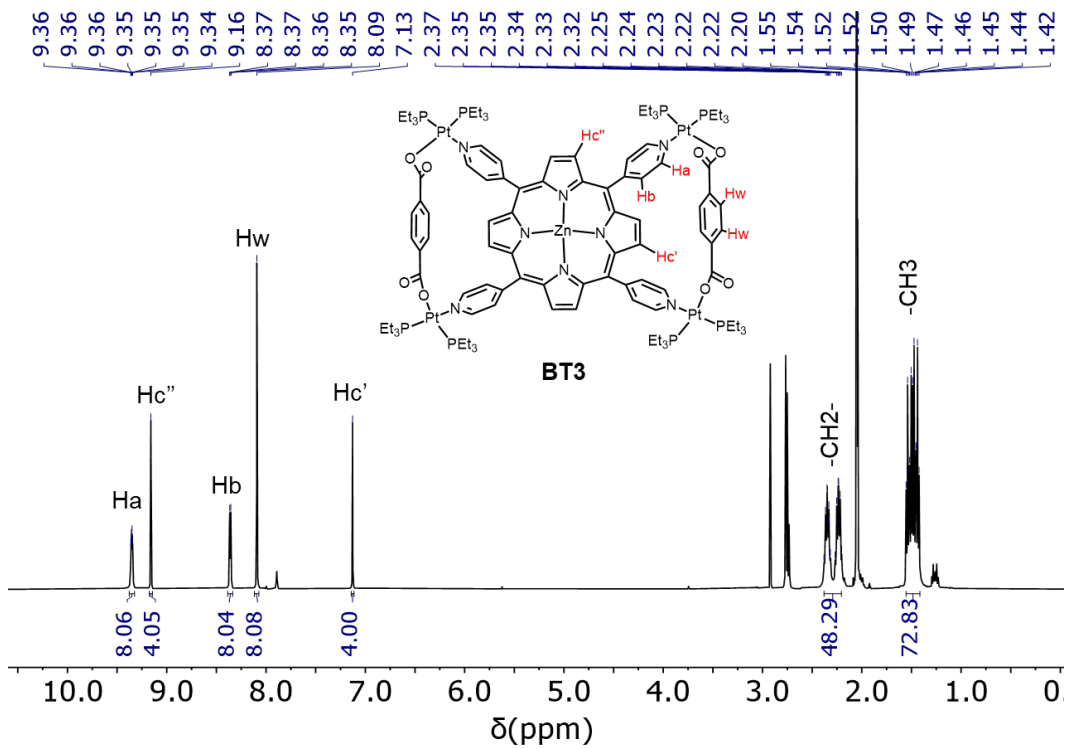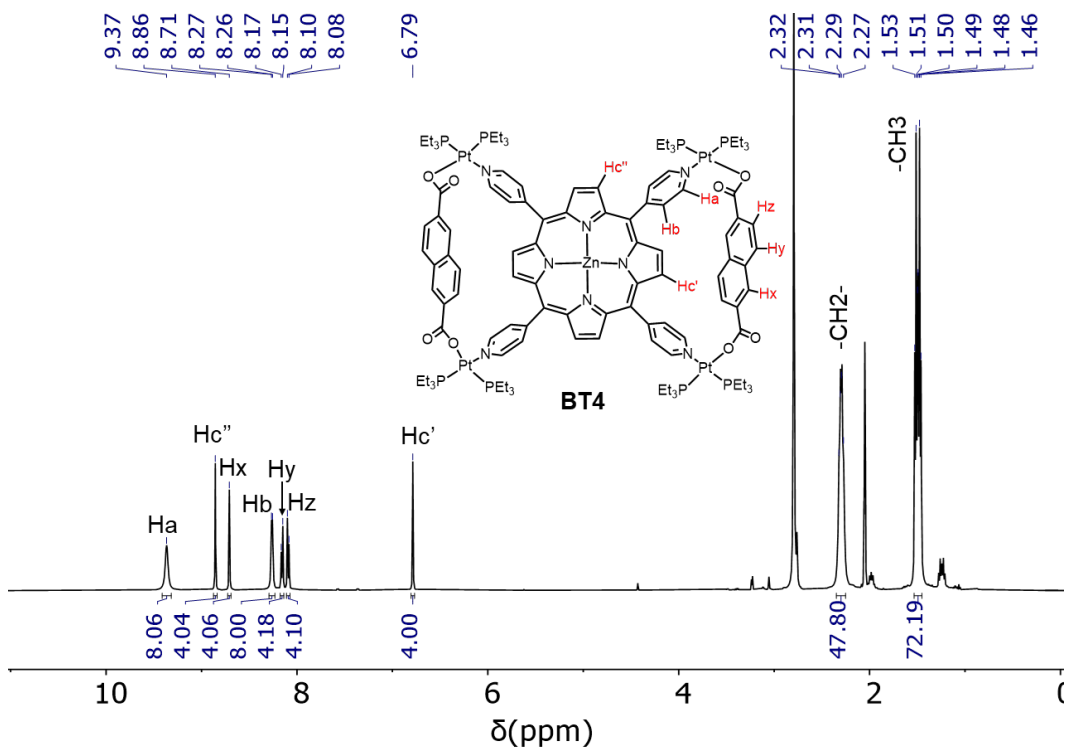

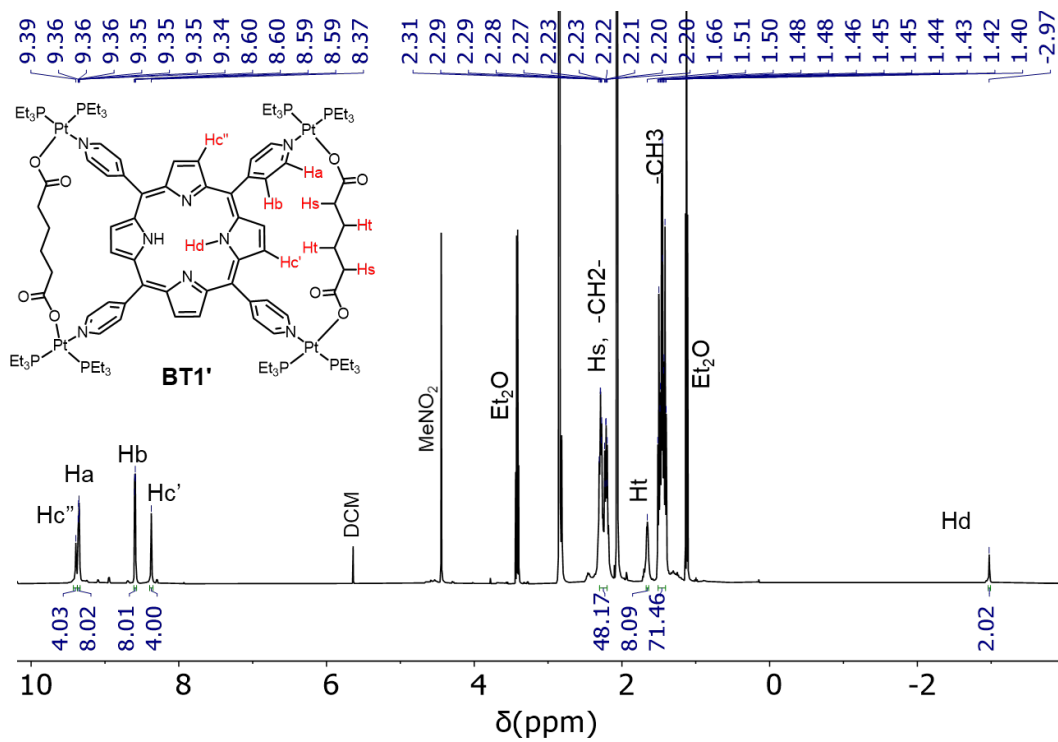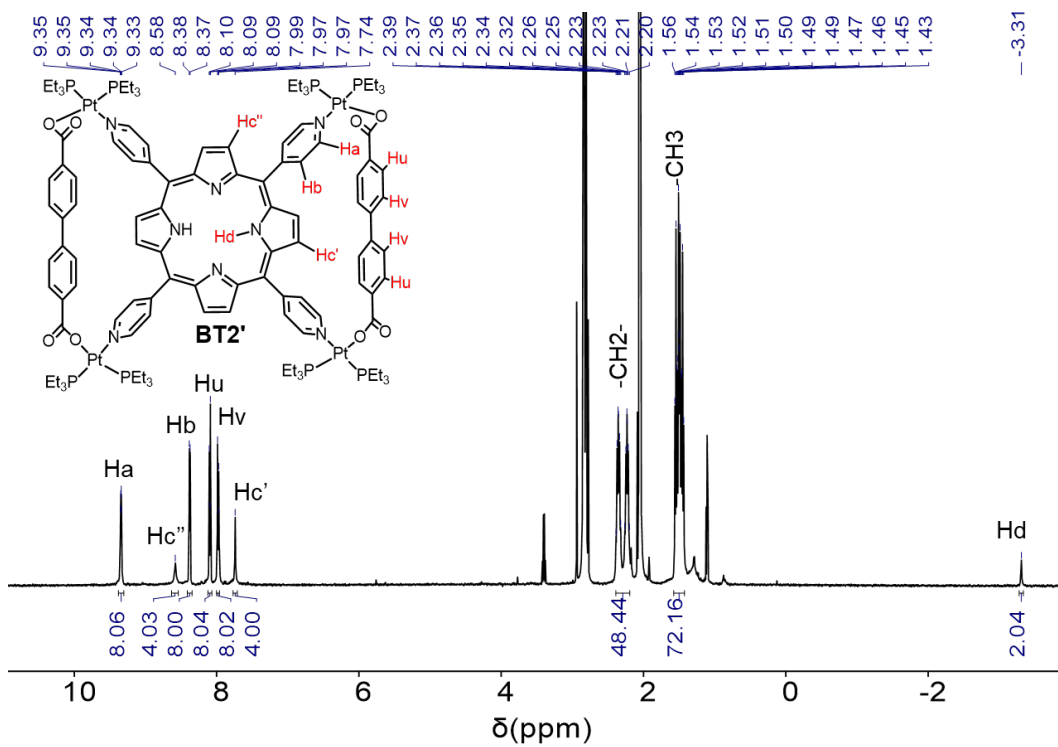

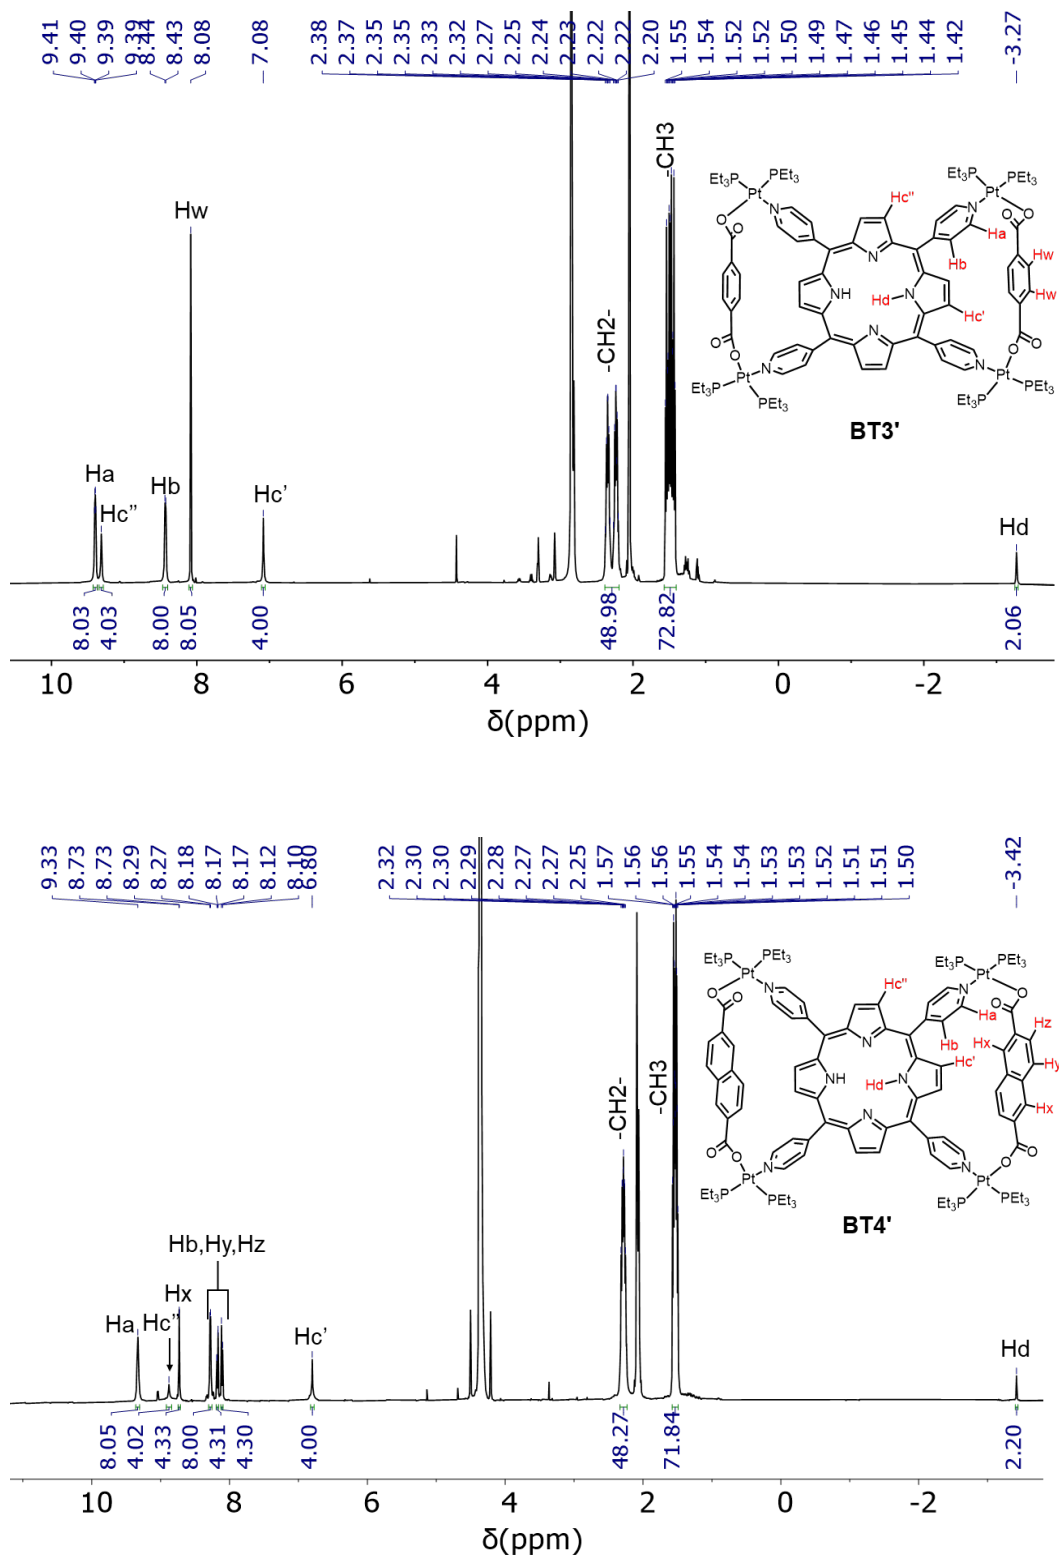

Fig. S3. <sup>1</sup>H NMR spectra (500 MHz, acetone-*d*<sub>6</sub>) of BT1–BT4 and BT1'–BT4' complexes.



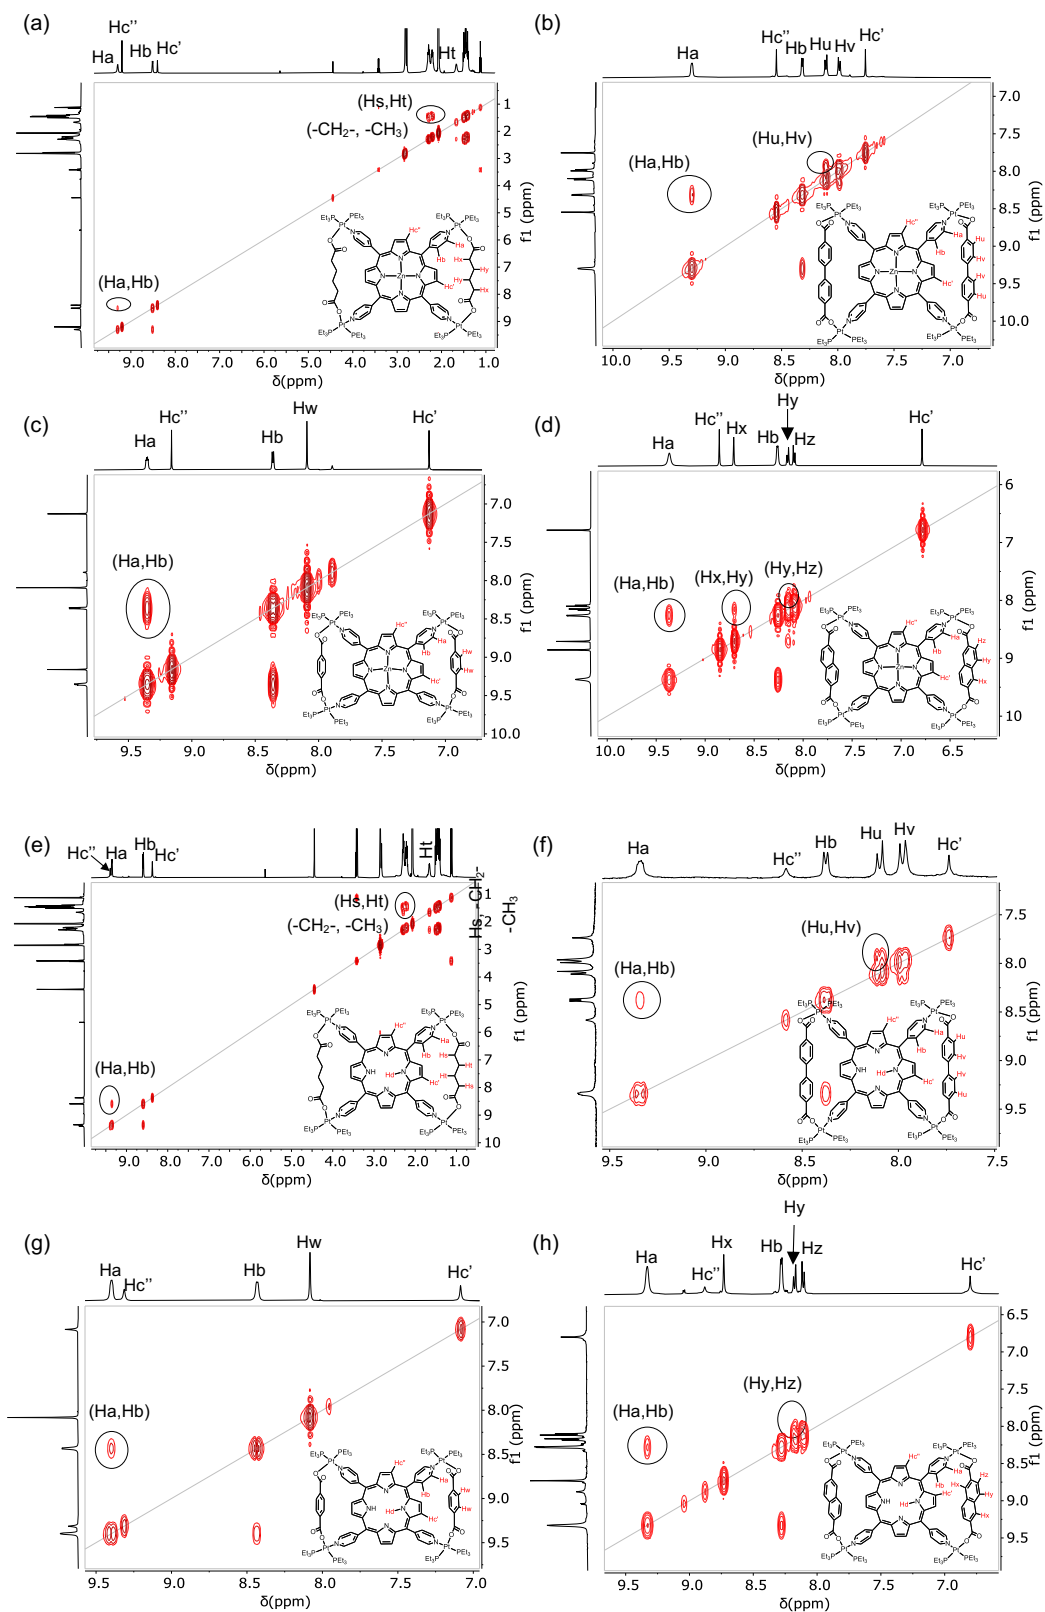

**Fig. S4.**  $^1\text{H}$ - $^1\text{H}$  COSY NMR spectra (500 MHz, acetone- $d_6$ ) of (a-d) BT1-BT4 and (e-h) BT1'-BT4' complexes.

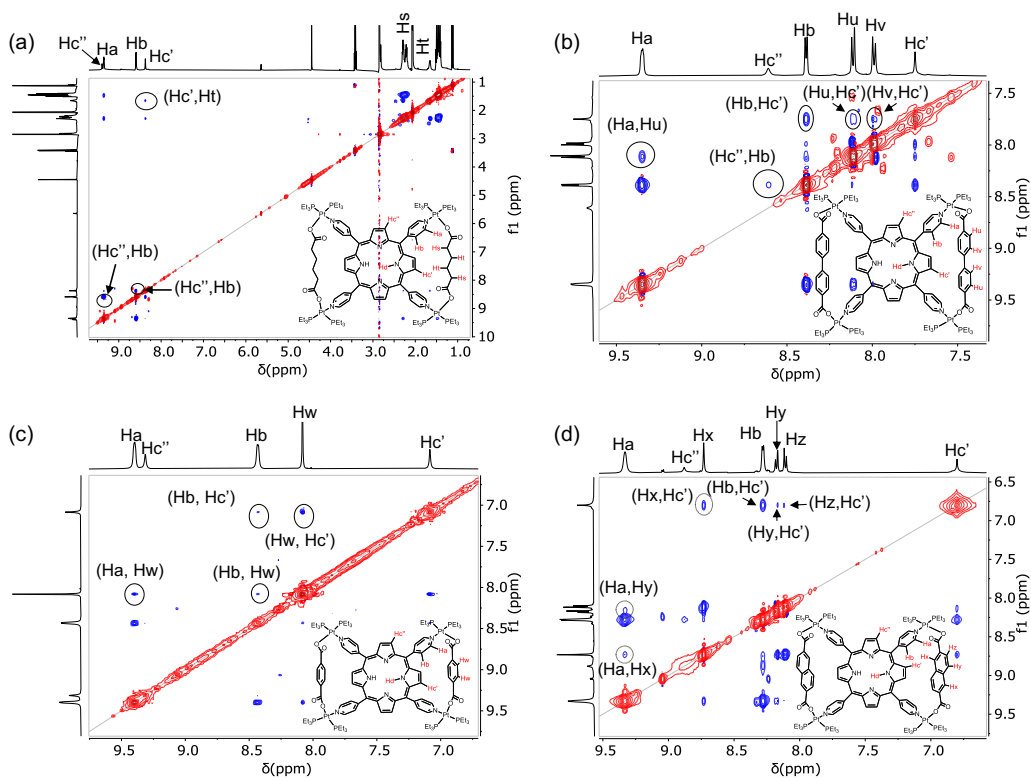

**Fig. S5.**  $^1\text{H}$ - $^1\text{H}$  ROESY NMR spectra (500 MHz, acetone- $d_6$ ) of (a) **BT1'**, (b) **BT2'**, (c) **BT3'**, and (d) **BT4'** complexes.

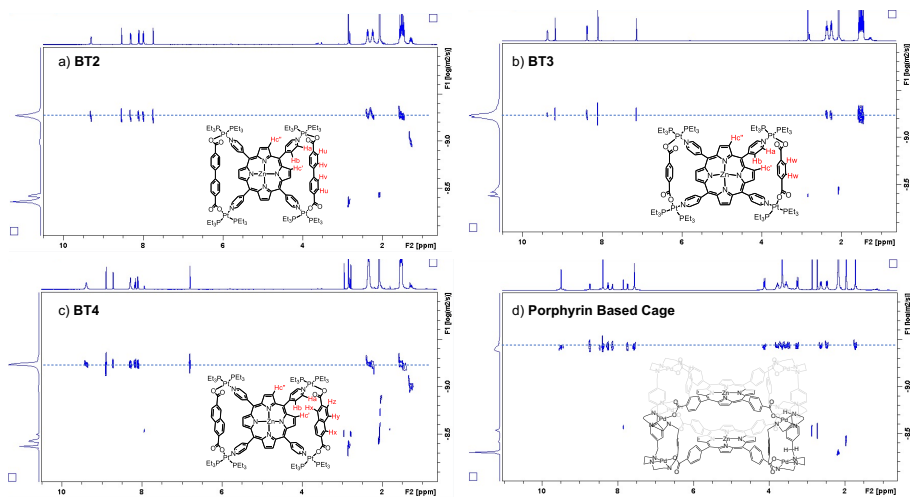

**Fig. S6.** DOSY NMR spectra (500 MHz) of **BT2** ( $D = 5.40 \times 10^{-10} \text{ m}^2/\text{s}$ ), **BT3** ( $D = 5.63 \times 10^{-10} \text{ m}^2/\text{s}$ ), **BT4** ( $D = 5.67 \times 10^{-10} \text{ m}^2/\text{s}$ ) in acetone- $d_6$  and a porphyrin-based cage ( $D = 3.76 \times 10^{-10} \text{ m}^2/\text{s}$ ) in  $\text{CD}_3\text{CN}$ .

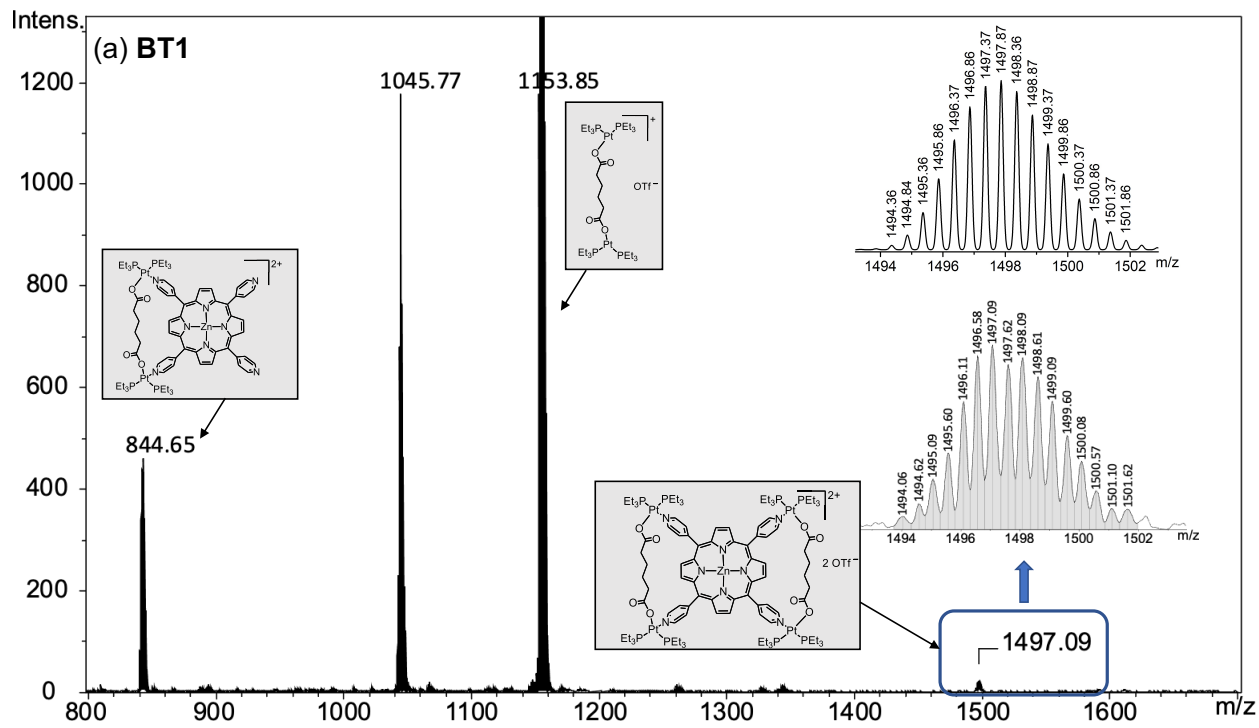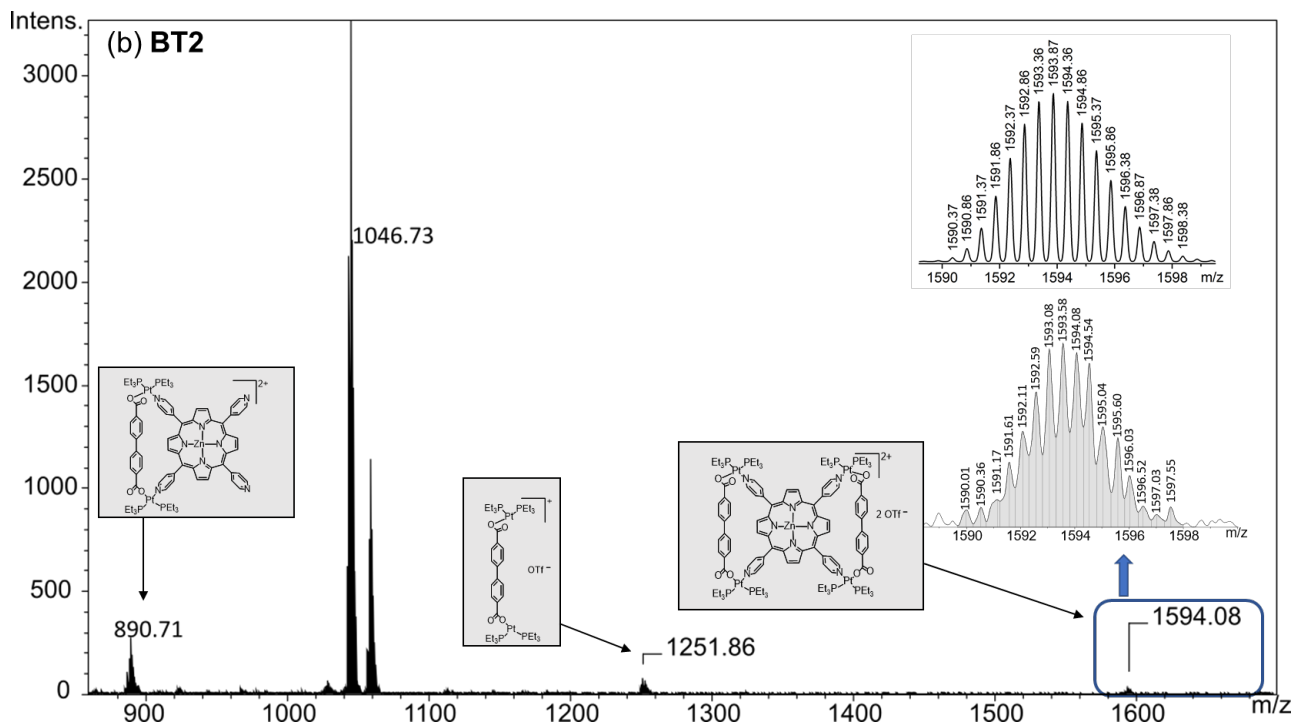

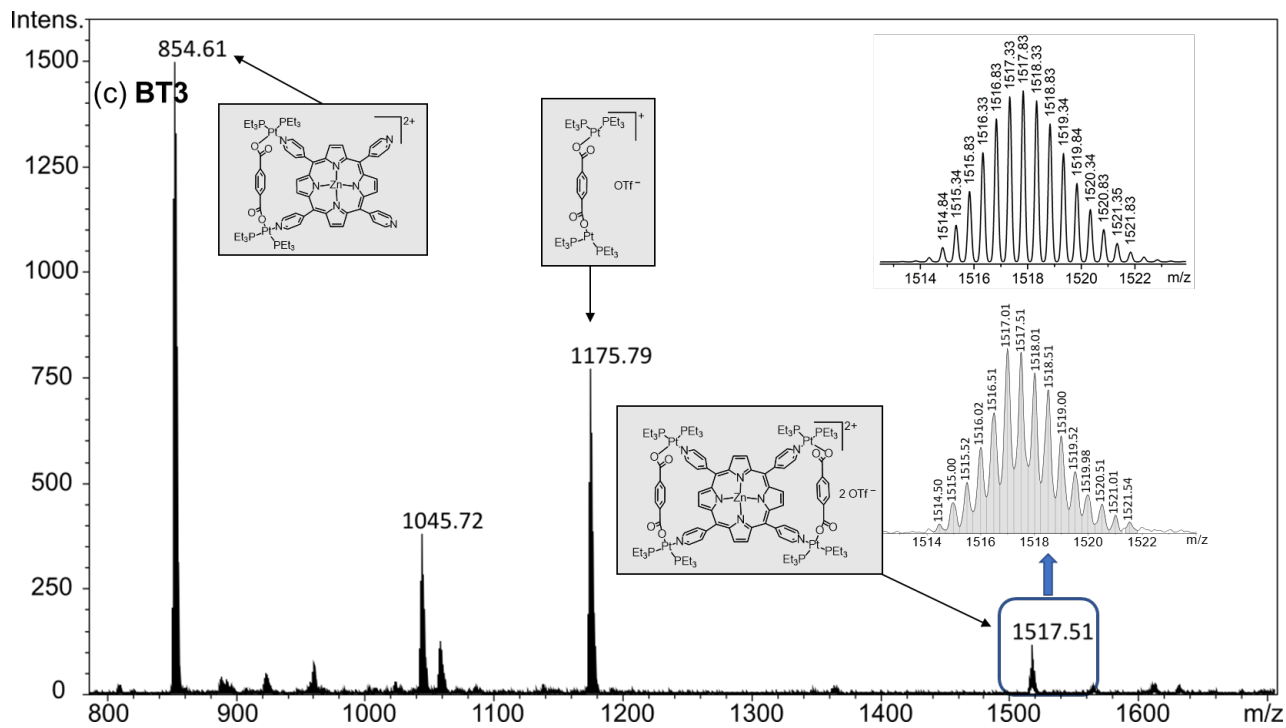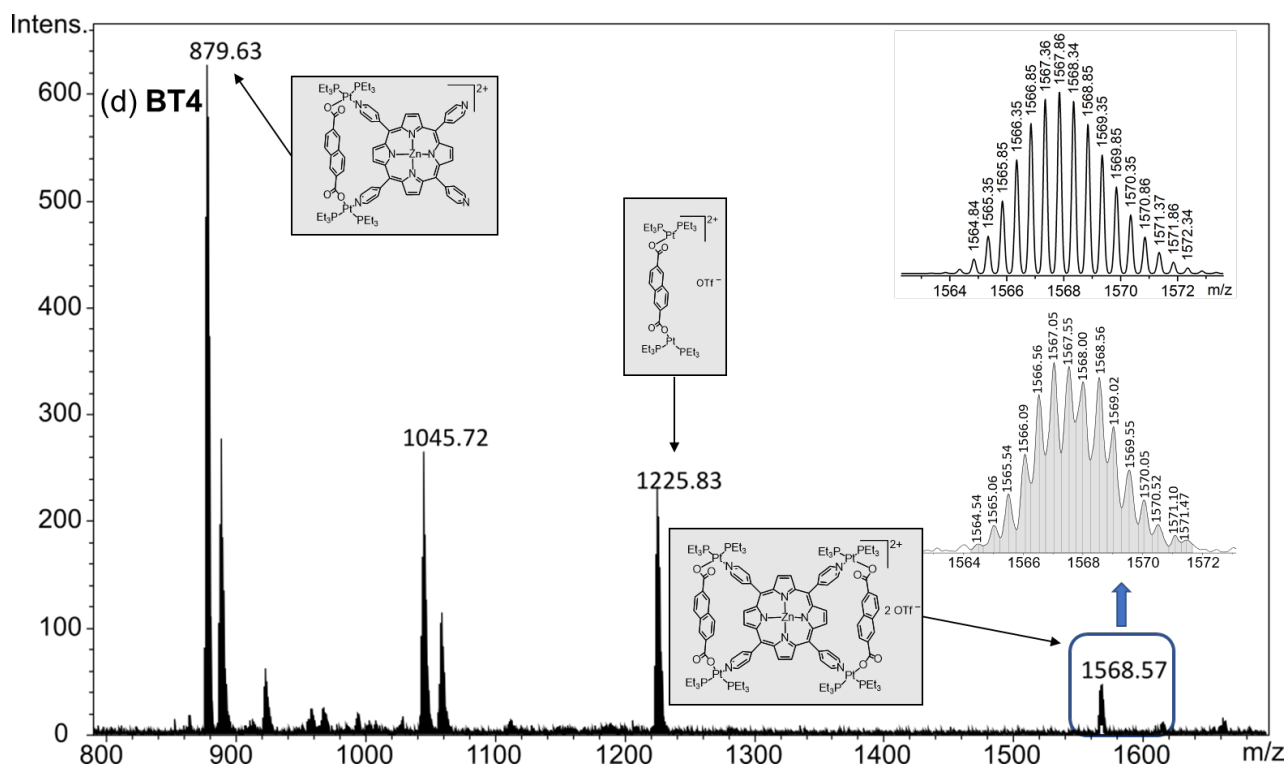

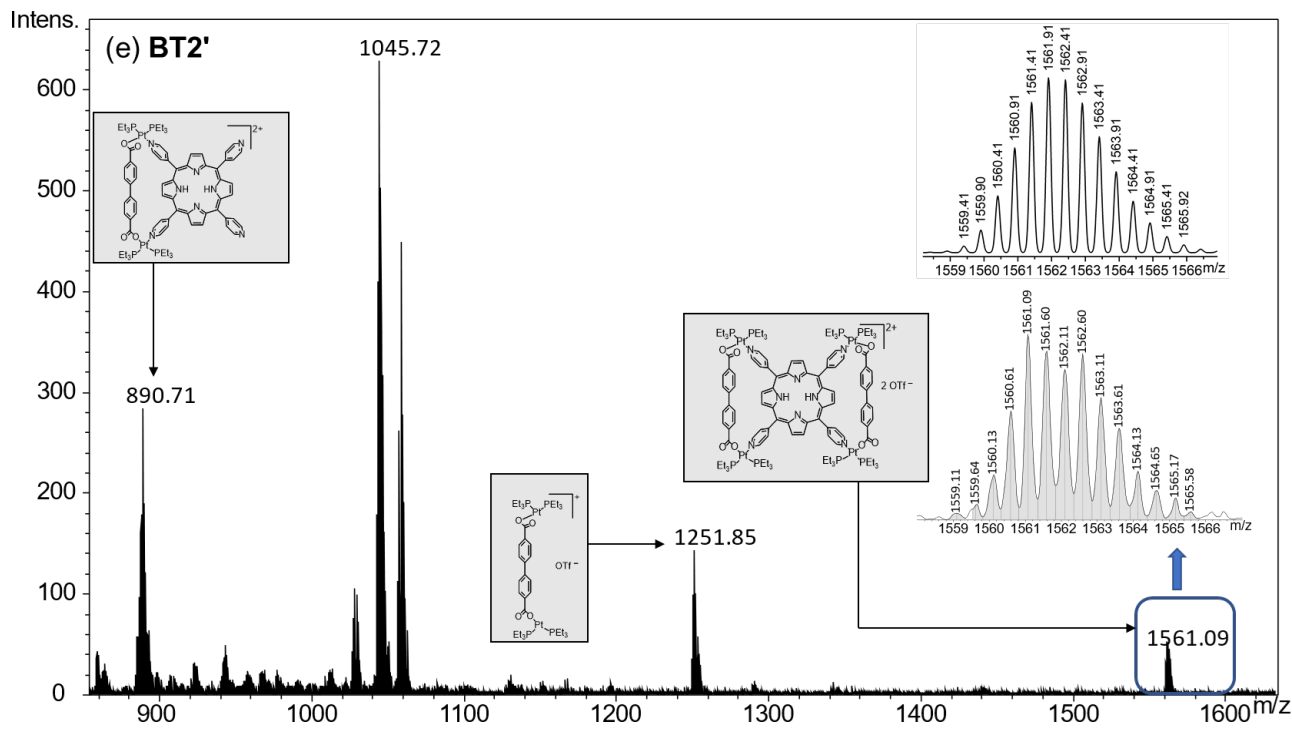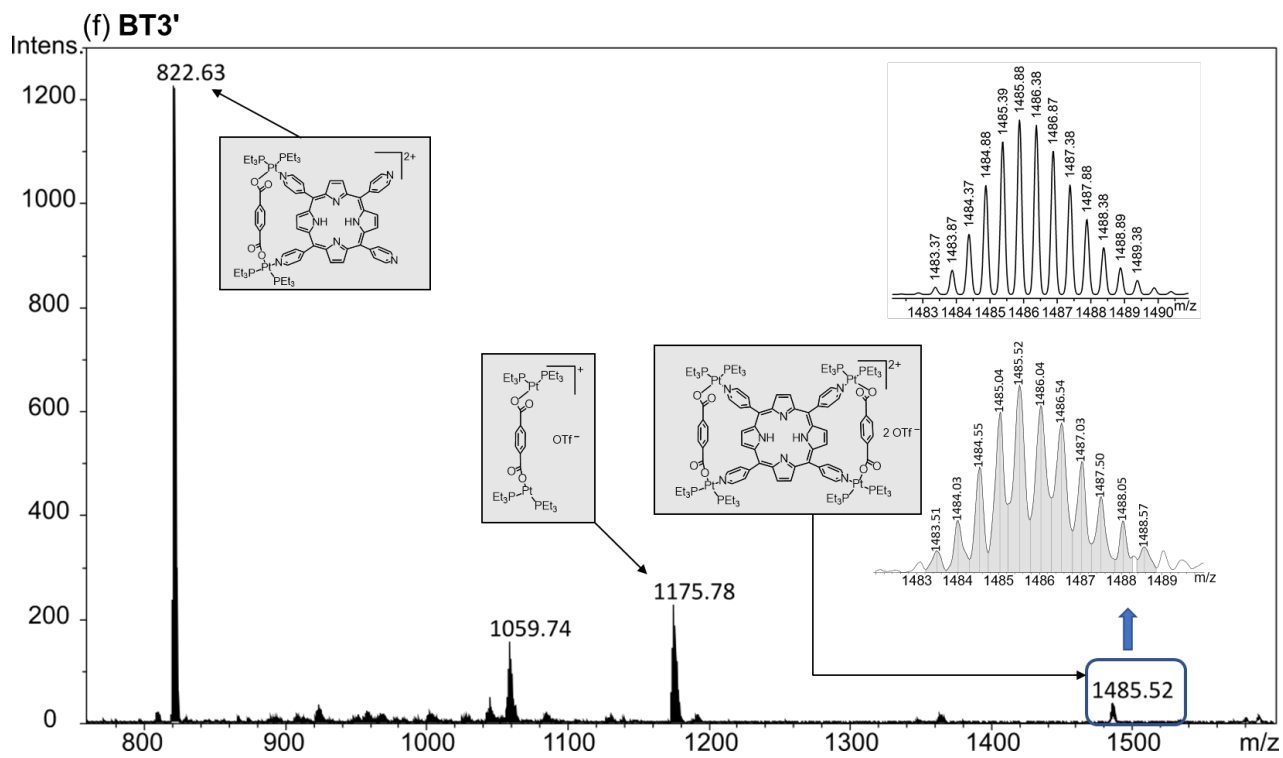

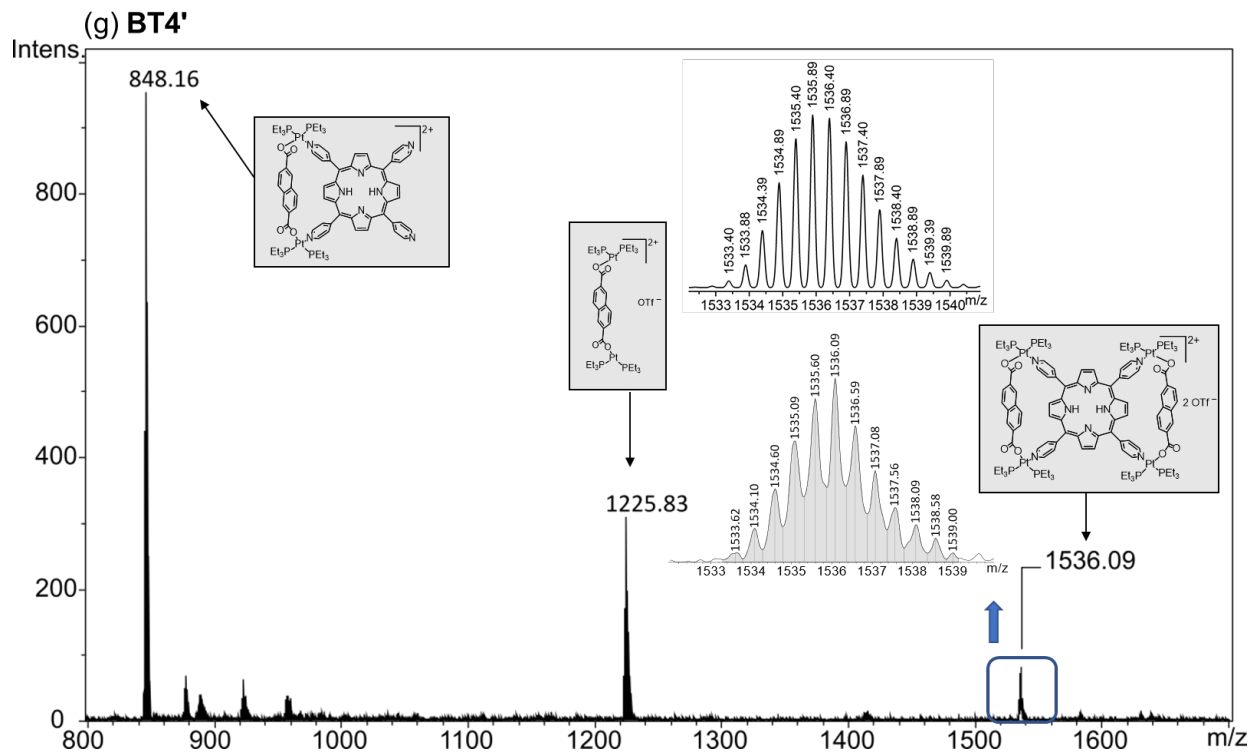

**Fig. S7.** ESI-MS data of (a) **BT1**, (b) **BT2**, (c) **BT3**, (d) **BT4**, (e) **BT2'**, (f) **BT3'**, and (g) **BT4'** complexes. The insets show the calculated (top) and experimental (bottom) isotopic distributions of respective  $[M - 2TfO]^{2+}$  species.

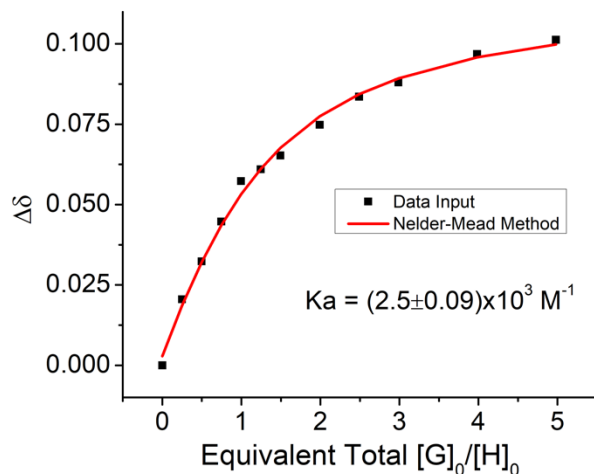

**Fig. S8.** To determine the association constant corresponding to the formation of the **BT4/HATHCN** complex  $^1\text{H}$  NMR titration was carried by adding a solution of **HATHCN** (0 – 5 eq) to a solution of **BT4** ( $[\text{BT4}] = 5.8 \times 10^{-4} \text{ M}$ ) in 3:7  $\text{CD}_2\text{Cl}_2/\text{CD}_3\text{NO}_2$ . The association constant ( $K_a$ ) was calculated by a global fitting analysis to a 1:1 binding model using Nelder-Mead fit method from [www.supramolecular.org](http://www.supramolecular.org) web applet.<sup>4</sup>

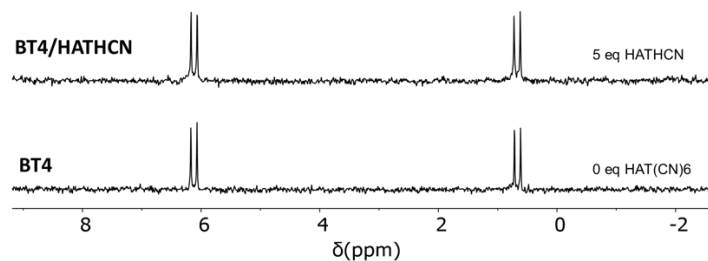

**Fig. S9.** The  $^{31}\text{P}$  NMR spectrum (122 MHz,  $\text{CD}_2\text{Cl}_2/\text{CD}_3\text{NO}_2$  4:1) of the **BT4** complex reveals that the simultaneous coordination of carboxylate and pyridyl groups with heteroligated Pt(N,O) corners in the bow tie complexes remains after the formation of the **BT4**•HATHCN.

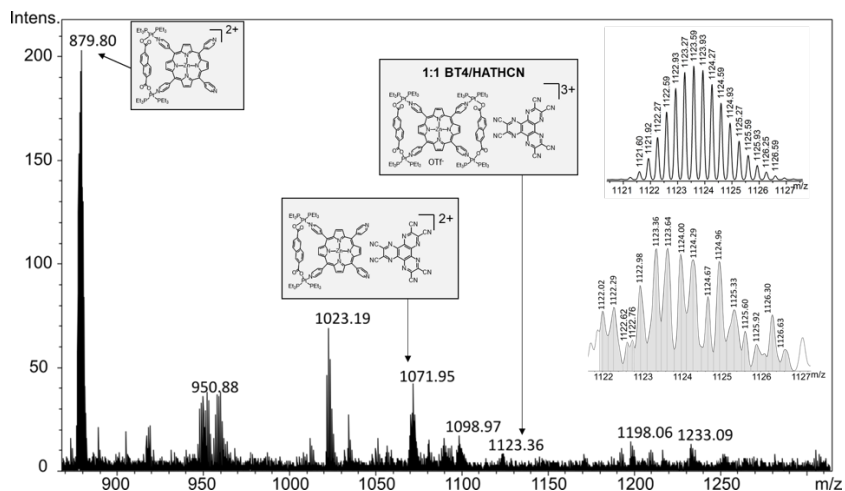

**Fig. S10.** ESI-MS data of 1:1 **BT4**•HATHCN complex. The inset shows the calculated (top) and experimental (bottom) isotopic distribution for  $[\text{M} - \text{TfO}]^{3+}$ .

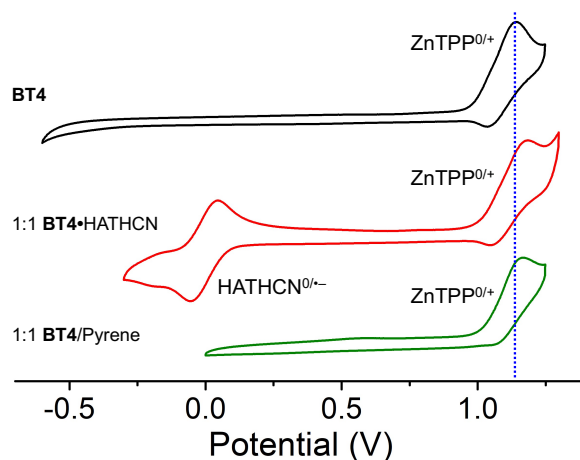

**Fig. S11.** Cyclic voltammograms of the **BT4** (black), 1:1 **BT4**•HATHCN complex (red), and 1:1 **BT4**/Pyrene mixture (green) (vs. Ag/AgCl in 0.1 M of  $\text{Bu}_4\text{N} \cdot \text{TfO}/\text{CH}_2\text{Cl}_2$ ).

## Crystallographic Data.

**Table 1.** Crystallographic Data for **BT2**, **BT3** and **BT4**.

| Compound                          | <b>BT2</b>                                                                                                       | <b>BT3</b>                                                                                          | <b>BT4</b>                                                                                        |
|-----------------------------------|------------------------------------------------------------------------------------------------------------------|-----------------------------------------------------------------------------------------------------|---------------------------------------------------------------------------------------------------|
| Empirical formula                 | C120 H160 F12 N8 O20 P8 Pt4 S4 Zn                                                                                | C108 H152 F12 N8 O20 P8 Pt4 S4 Zn                                                                   | C116 H156 F12 N8 O11 P8 Pt4 S4 Zn                                                                 |
| Formula weight                    | 3484.28                                                                                                          | 3332.1                                                                                              | 3278.21                                                                                           |
| Temperature                       | 173(2) K                                                                                                         | 100(2) K                                                                                            | 100(2) K                                                                                          |
| Wavelength                        | 0.71073 Å                                                                                                        | 0.71073 Å                                                                                           | 0.71073 Å                                                                                         |
| Crystal system                    | Triclinic                                                                                                        | Monoclinic                                                                                          | Monoclinic                                                                                        |
| Space group                       | P -1                                                                                                             | C 2/c                                                                                               | P 21/c                                                                                            |
| Unit cell dimensions              | a = 14.177(3) Å    α = 100.941(5)°.<br>b = 15.762(3) Å    β = 104.110(5)°.<br>c = 20.164(4) Å    γ = 95.391(6)°. | a = 30.647(10) Å    α = 90°.<br>b = 15.376(5) Å    β = 104.412(8)°.<br>c = 31.873(11) Å    γ = 90°. | a = 23.980(2) Å    α = 90°.<br>b = 33.628(3) Å    β = 109.469(2)°.<br>c = 22.415(2) Å    γ = 90°. |
| Volume                            | 4243.8(16) Å <sup>3</sup>                                                                                        | 14547(9) Å <sup>3</sup>                                                                             | 17042(3) Å <sup>3</sup>                                                                           |
| Z                                 | 1                                                                                                                | 4                                                                                                   | 4                                                                                                 |
| Density (calculated)              | 1.363 Mg/m <sup>3</sup>                                                                                          | 1.521 Mg/m <sup>3</sup>                                                                             | 1.278 Mg/m <sup>3</sup>                                                                           |
| Absorption coefficient            | 3.614 mm <sup>-1</sup>                                                                                           | 4.213 mm <sup>-1</sup>                                                                              | 3.592 mm <sup>-1</sup>                                                                            |
| F(000)                            | 1730                                                                                                             | 6600                                                                                                | 6504                                                                                              |
| Crystal size                      | 0.164 x 0.132 x 0.112 mm <sup>3</sup>                                                                            | 0.350 x 0.260 x 0.020 mm <sup>3</sup>                                                               | 0.330 x 0.080 x 0.060 mm <sup>3</sup>                                                             |
| Theta range for data collection   | 2.688 to 25.250°.                                                                                                | 4.116 to 16.974°.                                                                                   | 4.076 to 19.082°.                                                                                 |
| Index ranges                      | -17<=h<=17, -18<=k<=18, -24<=l<=24                                                                               | -25<=h<=24, -12<=k<=12, -26<=l<=24                                                                  | -21<=h<=21, -30<=k<=30, -20<=l<=20                                                                |
| Reflections collected             | 40383                                                                                                            | 15135                                                                                               | 54937                                                                                             |
| Independent reflections           | 15172 [R(int) = 0.0832]                                                                                          | 4045 [R(int) = 0.1205]                                                                              | 13508 [R(int) = 0.1416]                                                                           |
| Completeness to theta             | (25.242°) 98.7%                                                                                                  | (16.974°) 95.8%                                                                                     | (19.082°) 97.1%                                                                                   |
| Absorption correction             | Semi-empirical from equivalents                                                                                  | None                                                                                                | None                                                                                              |
| Refinement method                 | Full-matrix least-squares on F <sup>2</sup>                                                                      | Full-matrix least-squares on F <sup>2</sup>                                                         | Full-matrix least-squares on F <sup>2</sup>                                                       |
| Data / restraints / parameters    | 15172 / 345 / 655                                                                                                | 4045 / 650 / 571                                                                                    | 13508 / 3329 / 1507                                                                               |
| Goodness-of-fit on F <sup>2</sup> | 1.047                                                                                                            | 2.694                                                                                               | 1.022                                                                                             |
| Final R indices [I>2σ(I)]         | R1 = 0.1438, wR2 = 0.3449                                                                                        | R1 = 0.2450, wR2 = 0.5287                                                                           | R1 = 0.1157, wR2 = 0.2864                                                                         |
| R indices (all data)              | R1 = 0.2192, wR2 = 0.4222                                                                                        | R1 = 0.2787, wR2 = 0.5508                                                                           | R1 = 0.1868, wR2 = 0.3442                                                                         |
| Largest diff. peak and hole       | 3.868 and -3.352 e.Å <sup>-3</sup>                                                                               | 4.770 and -1.921 e.Å <sup>-3</sup>                                                                  | 1.948 and -1.323 e.Å <sup>-3</sup>                                                                |



**Table 2.** Crystallographic Data for **BT2'** and **BT3'**.

| Compound                        | <b>BT2'</b>                                                                                                                        | <b>BT3'</b>                                                                                                            |
|---------------------------------|------------------------------------------------------------------------------------------------------------------------------------|------------------------------------------------------------------------------------------------------------------------|
| Empirical formula               | C123 H168 F12 N8 O21 P8 Pt4 S4                                                                                                     | C108 H152 F12 N8 O20 P8 Pt4 S4                                                                                         |
| Formula weight                  | 3479                                                                                                                               | 3264.71                                                                                                                |
| Temperature                     | 100(2) K                                                                                                                           | 100(2) K                                                                                                               |
| Wavelength                      | 0.71073 Å                                                                                                                          | 0.71073 Å                                                                                                              |
| Crystal system                  | Monoclinic                                                                                                                         | Tetragonal                                                                                                             |
| Space group                     | C 2/c                                                                                                                              | I 41/a                                                                                                                 |
| Unit cell dimensions            | a = 42.500(3) Å $\alpha = 90^\circ$ .<br>b = 17.5276(14) Å $\beta = 107.338(2)^\circ$ .<br>c = 22.8229(18) Å $\gamma = 90^\circ$ . | a = 34.285(6) Å $\alpha = 90^\circ$ .<br>b = 34.285(6) Å $\beta = 90^\circ$ .<br>c = 23.949(5) Å $\gamma = 90^\circ$ . |
| Volume                          | 16229(2) Å <sup>3</sup>                                                                                                            | 28151(11) Å <sup>3</sup>                                                                                               |
| Z                               | 4                                                                                                                                  | 8                                                                                                                      |
| Density (calculated)            | 1.424 Mg/m <sup>3</sup>                                                                                                            | 1.541 Mg/m <sup>3</sup>                                                                                                |
| Absorption coefficient          | 3.638 mm <sup>-1</sup>                                                                                                             | 4.188 mm <sup>-1</sup>                                                                                                 |
| F(000)                          | 6936                                                                                                                               | 12944                                                                                                                  |
| Crystal size                    | 0.160 x 0.120 x 0.030 mm <sup>3</sup>                                                                                              | 0.18 x 0.12 x 0.04 mm <sup>3</sup>                                                                                     |
| Theta range for data collection | 2.309 to 25.250°.                                                                                                                  | 2.304 to 17.312°.                                                                                                      |
| Index ranges                    | -50<=h<=50, -20<=k<=21, -27<=l<=27                                                                                                 | -28<=h<=28, -28<=k<=28, -20<=l<=19                                                                                     |
| Reflections collected           | 48255                                                                                                                              | 33537                                                                                                                  |
| Independent reflections         | 14608 [R(int) = 0.0829]                                                                                                            | 4010 [R(int) = 0.1656]                                                                                                 |
| Completeness to theta           | (25.242°) 99.4%                                                                                                                    | (17.312°) 92.7%                                                                                                        |
| Absorption correction           | Semi-empirical from equivalents                                                                                                    | Semi-empirical from equivalents                                                                                        |
| Refinement method               | Full-matrix least-squares on F <sup>2</sup>                                                                                        | Full-matrix least-squares on F <sup>2</sup>                                                                            |
| Data / restraints / parameters  | 14608 / 96 / 824                                                                                                                   | 4010 / 1227 / 696                                                                                                      |
| Goodness-of-fit on F2           | 1.065                                                                                                                              | 1.361                                                                                                                  |
| Final R indices [I>2sigma(I)]   | R1 = 0.0850, wR2 = 0.1982                                                                                                          | R1 = 0.1104, wR2 = 0.2814                                                                                              |
| R indices (all data)            | R1 = 0.1100, wR2 = 0.2126                                                                                                          | R1 = 0.1786, wR2 = 0.3603                                                                                              |
| Largest diff. peak and hole     | 3.151 and -3.752 e.Å <sup>-3</sup>                                                                                                 | 2.357 and -0.946 e.Å <sup>-3</sup>                                                                                     |

**Table 3.** Atomic coordinates ( $\times 10^4$ ) and equivalent isotropic displacement parameters ( $\text{Å}^2 \times 10^3$ ) for **BT2**. U(eq) is defined as one third of the trace of the orthogonalized U<sup>ij</sup> tensor.

|       | x       | y        | z       | U(eq) |
|-------|---------|----------|---------|-------|
| Pt(1) | 7791(1) | 5049(1)  | 7517(1) | 63(1) |
| Pt(2) | 3947(1) | -1436(1) | 1101(1) | 70(1) |
| Zn(1) | 10000   | 0        | 5000    | 87(2) |
| P(1)  | 6998(7) | 6182(5)  | 7805(5) | 93(3) |

|       |           |           |          |         |
|-------|-----------|-----------|----------|---------|
| P(2)  | 9278(5)   | 5624(5)   | 8225(4)  | 62(2)   |
| P(3)  | 4493(5)   | -2410(6)  | 329(5)   | 82(2)   |
| P(4)  | 2484(6)   | -1474(6)  | 334(5)   | 86(3)   |
| O(1)  | 6183(15)  | 3477(13)  | 7453(10) | 81(4)   |
| O(2)  | 6454(14)  | 4549(13)  | 6813(9)  | 70(4)   |
| O(3)  | 3596(14)  | -445(11)  | 1769(12) | 79(4)   |
| O(4)  | 2973(15)  | -1373(12) | 2334(12) | 86(5)   |
| N(1)  | 10534(15) | 864(13)   | 5922(11) | 63(5)   |
| N(2)  | 8687(16)  | 512(15)   | 4855(12) | 74(6)   |
| N(3)  | 8275(13)  | 3898(11)  | 7029(12) | 54(4)   |
| N(4)  | 5266(14)  | -1203(17) | 1928(12) | 69(5)   |
| C(1)  | 11409(18) | 978(17)   | 6387(13) | 61(6)   |
| C(2)  | 11493(19) | 1613(19)  | 6990(14) | 72(6)   |
| C(3)  | 10665(18) | 1948(19)  | 6923(14) | 72(6)   |
| C(4)  | 10039(18) | 1480(19)  | 6230(13) | 67(6)   |
| C(5)  | 9068(19)  | 1630(17)  | 5941(14) | 63(7)   |
| C(6)  | 8453(18)  | 1163(18)  | 5286(14) | 66(6)   |
| C(7)  | 7461(18)  | 1337(18)  | 4973(14) | 66(6)   |
| C(8)  | 7080(20)  | 686(18)   | 4337(14) | 68(6)   |
| C(9)  | 7884(18)  | 219(18)   | 4269(13) | 63(6)   |
| C(10) | 7800(20)  | -453(19)  | 3724(13) | 69(8)   |
| C(11) | 8725(16)  | 2421(17)  | 6313(13) | 58(7)   |
| C(12) | 8780(30)  | 3140(20)  | 6086(17) | 102(13) |
| C(13) | 8484(16)  | 3931(14)  | 6503(15) | 55(4)   |
| C(14) | 8205(16)  | 3181(14)  | 7297(15) | 55(4)   |
| C(15) | 8453(17)  | 2389(15)  | 6934(11) | 50(6)   |
| C(16) | 6896(16)  | -677(17)  | 3078(12) | 52(6)   |
| C(17) | 6700(20)  | -200(20)  | 2591(16) | 92(11)  |
| C(18) | 5831(17)  | -440(20)  | 2029(15) | 70(5)   |
| C(19) | 5407(17)  | -1660(20) | 2401(15) | 69(5)   |
| C(20) | 6210(20)  | -1450(20) | 3002(16) | 84(9)   |
| C(21) | 6110(20)  | 3760(20)  | 6923(15) | 71(4)   |
| C(22) | 5520(30)  | 3115(16)  | 6249(16) | 92(4)   |
| C(23) | 5470(30)  | 2225(15)  | 6229(16) | 91(4)   |
| C(24) | 5090(30)  | 1650(20)  | 5586(12) | 91(4)   |
| C(25) | 4740(30)  | 1890(16)  | 4957(15) | 91(4)   |
| C(26) | 4770(30)  | 2781(15)  | 4991(16) | 93(4)   |
| C(27) | 5180(30)  | 3380(20)  | 5627(12) | 93(4)   |
| C(28) | 4289(19)  | 1324(17)  | 4297(15) | 89(4)   |
| C(29) | 3712(17)  | 507(15)   | 4243(15) | 89(4)   |
| C(30) | 3430(20)  | -138(19)  | 3608(12) | 89(4)   |
| C(31) | 3670(20)  | 10(18)    | 2989(15) | 89(4)   |
| C(32) | 4300(20)  | 797(16)   | 3058(16) | 89(4)   |

|       |           |           |          |         |
|-------|-----------|-----------|----------|---------|
| C(33) | 4570(20)  | 1450(20)  | 3687(13) | 89(4)   |
| C(34) | 3400(20)  | -713(17)  | 2346(19) | 81(4)   |
| C(35) | 10150(20) | 4860(30)  | 8130(20) | 108(9)  |
| C(36) | 11190(20) | 5250(30)  | 8580(20) | 109(9)  |
| C(37) | 9870(30)  | 6630(30)  | 8040(20) | 110(10) |
| C(38) | 10040(30) | 6520(30)  | 7330(20) | 111(10) |
| C(39) | 9450(30)  | 5850(20)  | 9170(20) | 117(10) |
| C(40) | 8880(30)  | 5120(20)  | 9390(20) | 118(10) |
| C(41) | 5890(20)  | 5710(20)  | 7928(19) | 98(8)   |
| C(42) | 6110(30)  | 5420(20)  | 8611(18) | 98(8)   |
| C(43) | 7580(30)  | 7110(20)  | 8480(20) | 130(11) |
| C(44) | 6820(30)  | 7850(30)  | 8520(20) | 131(11) |
| C(45) | 6620(30)  | 6610(30)  | 7048(19) | 125(11) |
| C(46) | 7230(30)  | 6950(30)  | 6770(20) | 126(11) |
| C(47) | 1560(20)  | -2430(20) | 225(19)  | 108(10) |
| C(48) | 1450(30)  | -2600(20) | 927(19)  | 111(10) |
| C(49) | 1930(30)  | -510(20)  | 620(30)  | 190(20) |
| C(50) | 980(30)   | -480(30)  | 60(30)   | 190(20) |
| C(51) | 2440(40)  | -1470(30) | -582(17) | 184(18) |
| C(52) | 3030(40)  | -640(30)  | -650(30) | 186(18) |
| C(53) | 3690(40)  | -3400(30) | -100(30) | 153(13) |
| C(54) | 3170(40)  | -3980(30) | 270(30)  | 153(13) |
| C(56) | 5850(30)  | -1170(30) | 90(20)   | 134(11) |
| C(55) | 5210(30)  | -2060(30) | -240(20) | 135(11) |
| C(57) | 5500(40)  | -2920(30) | 880(20)  | 140(12) |
| C(58) | 5840(40)  | -3660(30) | 430(20)  | 143(12) |

**Table 4.** Bond lengths [Å] and angles [°] for **BT2**.

|              |           |
|--------------|-----------|
| Pt(1)-O(2)   | 2.052(19) |
| Pt(1)-N(3)   | 2.148(17) |
| Pt(1)-P(2)   | 2.233(7)  |
| Pt(1)-P(1)   | 2.258(7)  |
| Pt(2)-O(3)   | 2.044(19) |
| Pt(2)-N(4)   | 2.13(2)   |
| Pt(2)-P(4)   | 2.253(8)  |
| Pt(2)-P(3)   | 2.298(9)  |
| Zn(1)-N(1)#1 | 2.011(18) |
| Zn(1)-N(1)   | 2.011(18) |
| Zn(1)-N(2)#1 | 2.08(2)   |

|              |         |
|--------------|---------|
| Zn(1)-N(2)   | 2.08(2) |
| P(1)-C(41)   | 1.77(3) |
| P(1)-C(45)   | 1.77(3) |
| P(1)-C(43)   | 1.77(3) |
| P(2)-C(39)   | 1.81(4) |
| P(2)-C(35)   | 1.82(4) |
| P(2)-C(37)   | 1.87(3) |
| P(3)-C(53)   | 1.78(5) |
| P(3)-C(55)   | 1.83(4) |
| P(3)-C(57)   | 1.92(5) |
| P(4)-C(51)   | 1.83(3) |
| P(4)-C(49)   | 1.83(3) |
| P(4)-C(47)   | 1.84(2) |
| O(1)-C(21)   | 1.22(3) |
| O(2)-C(21)   | 1.37(4) |
| O(3)-C(34)   | 1.39(4) |
| O(4)-C(34)   | 1.15(3) |
| N(1)-C(1)    | 1.33(3) |
| N(1)-C(4)    | 1.39(3) |
| N(2)-C(6)    | 1.34(3) |
| N(2)-C(9)    | 1.39(3) |
| N(3)-C(13)   | 1.18(3) |
| N(3)-C(14)   | 1.35(3) |
| N(4)-C(19)   | 1.29(4) |
| N(4)-C(18)   | 1.33(4) |
| C(1)-C(2)    | 1.39(3) |
| C(1)-C(10)#1 | 1.49(3) |
| C(2)-C(3)    | 1.32(3) |
| C(2)-H(2)    | 0.95    |
| C(3)-C(4)    | 1.47(3) |
| C(3)-H(3)    | 0.95    |
| C(4)-C(5)    | 1.42(3) |
| C(5)-C(6)    | 1.41(4) |
| C(5)-C(11)   | 1.51(3) |
| C(6)-C(7)    | 1.47(4) |
| C(7)-C(8)    | 1.43(3) |
| C(7)-H(7)    | 0.95    |
| C(8)-C(9)    | 1.44(4) |
| C(8)-H(8)    | 0.95    |
| C(9)-C(10)   | 1.35(3) |
| C(10)-C(16)  | 1.55(3) |
| C(11)-C(12)  | 1.31(4) |
| C(11)-C(15)  | 1.40(3) |

|              |           |
|--------------|-----------|
| C(12)-C(13)  | 1.52(3)   |
| C(12)-H(12)  | 0.95      |
| C(13)-H(13)  | 0.95      |
| C(14)-C(15)  | 1.44(3)   |
| C(14)-H(14)  | 0.95      |
| C(15)-H(15)  | 0.95      |
| C(16)-C(17)  | 1.34(4)   |
| C(16)-C(20)  | 1.45(4)   |
| C(17)-C(18)  | 1.42(4)   |
| C(17)-H(17)  | 0.95      |
| C(18)-H(18)  | 0.95      |
| C(19)-C(20)  | 1.40(4)   |
| C(19)-H(19)  | 0.95      |
| C(20)-H(20)  | 0.95      |
| C(21)-C(22)  | 1.53(4)   |
| C(22)-C(27)  | 1.388(18) |
| C(22)-C(23)  | 1.389(18) |
| C(23)-C(24)  | 1.386(18) |
| C(23)-H(23)  | 0.95      |
| C(24)-C(25)  | 1.384(18) |
| C(24)-H(24)  | 0.95      |
| C(25)-C(26)  | 1.389(18) |
| C(25)-C(28)  | 1.42(4)   |
| C(26)-C(27)  | 1.398(18) |
| C(26)-H(26)  | 0.95      |
| C(27)-H(27)  | 0.95      |
| C(28)-C(33)  | 1.425(18) |
| C(28)-C(29)  | 1.431(18) |
| C(29)-C(30)  | 1.418(18) |
| C(29)-H(29)  | 0.95      |
| C(30)-C(31)  | 1.424(18) |
| C(30)-H(30)  | 0.95      |
| C(31)-C(32)  | 1.421(18) |
| C(31)-C(34)  | 1.50(4)   |
| C(32)-C(33)  | 1.417(18) |
| C(32)-H(32)  | 0.95      |
| C(33)-H(33)  | 0.95      |
| C(35)-C(36)  | 1.52(5)   |
| C(35)-H(35A) | 0.99      |
| C(35)-H(35B) | 0.99      |
| C(36)-H(36A) | 0.98      |
| C(36)-H(36B) | 0.98      |
| C(36)-H(36C) | 0.98      |

|              |           |
|--------------|-----------|
| C(37)-C(38)  | 1.49(5)   |
| C(37)-H(37A) | 0.99      |
| C(37)-H(37B) | 0.99      |
| C(38)-H(38A) | 0.98      |
| C(38)-H(38B) | 0.98      |
| C(38)-H(38C) | 0.98      |
| C(39)-C(40)  | 1.53(5)   |
| C(39)-H(39A) | 0.99      |
| C(39)-H(39B) | 0.99      |
| C(40)-H(40A) | 0.98      |
| C(40)-H(40B) | 0.98      |
| C(40)-H(40C) | 0.98      |
| C(41)-C(42)  | 1.50(5)   |
| C(41)-H(41A) | 0.99      |
| C(41)-H(41B) | 0.99      |
| C(42)-H(42A) | 0.98      |
| C(42)-H(42B) | 0.98      |
| C(42)-H(42C) | 0.98      |
| C(43)-C(44)  | 1.66(5)   |
| C(43)-H(43A) | 0.99      |
| C(43)-H(43B) | 0.99      |
| C(44)-H(44A) | 0.98      |
| C(44)-H(44B) | 0.98      |
| C(44)-H(44C) | 0.98      |
| C(45)-C(46)  | 1.27(5)   |
| C(45)-H(45A) | 0.99      |
| C(45)-H(45B) | 0.99      |
| C(46)-H(46A) | 0.98      |
| C(46)-H(46B) | 0.98      |
| C(46)-H(46C) | 0.98      |
| C(47)-C(48)  | 1.532(10) |
| C(47)-H(47A) | 0.99      |
| C(47)-H(47B) | 0.99      |
| C(48)-H(48A) | 0.98      |
| C(48)-H(48B) | 0.98      |
| C(48)-H(48C) | 0.98      |
| C(49)-C(50)  | 1.534(10) |
| C(49)-H(49A) | 0.99      |
| C(49)-H(49B) | 0.99      |
| C(50)-H(50A) | 0.98      |
| C(50)-H(50B) | 0.98      |
| C(50)-H(50C) | 0.98      |
| C(51)-C(52)  | 1.531(10) |

|                     |           |
|---------------------|-----------|
| C(51)-H(51A)        | 0.99      |
| C(51)-H(51B)        | 0.99      |
| C(52)-H(52A)        | 0.98      |
| C(52)-H(52B)        | 0.98      |
| C(52)-H(52C)        | 0.98      |
| C(53)-C(54)         | 1.529(10) |
| C(53)-H(53A)        | 0.99      |
| C(53)-H(53B)        | 0.99      |
| C(54)-H(54A)        | 0.98      |
| C(54)-H(54B)        | 0.98      |
| C(54)-H(54C)        | 0.98      |
| C(56)-C(55)         | 1.530(10) |
| C(56)-H(56A)        | 0.98      |
| C(56)-H(56B)        | 0.98      |
| C(56)-H(56C)        | 0.98      |
| C(55)-H(55A)        | 0.99      |
| C(55)-H(55B)        | 0.99      |
| C(57)-C(58)         | 1.531(10) |
| C(57)-H(57A)        | 0.99      |
| C(57)-H(57B)        | 0.99      |
| C(58)-H(58A)        | 0.98      |
| C(58)-H(58B)        | 0.98      |
| C(58)-H(58C)        | 0.98      |
| O(2)-Pt(1)-N(3)     | 84.8(7)   |
| O(2)-Pt(1)-P(2)     | 176.2(6)  |
| N(3)-Pt(1)-P(2)     | 94.5(6)   |
| O(2)-Pt(1)-P(1)     | 82.8(5)   |
| N(3)-Pt(1)-P(1)     | 167.0(6)  |
| P(2)-Pt(1)-P(1)     | 97.6(3)   |
| O(3)-Pt(2)-N(4)     | 81.6(8)   |
| O(3)-Pt(2)-P(4)     | 88.4(6)   |
| N(4)-Pt(2)-P(4)     | 170.0(6)  |
| O(3)-Pt(2)-P(3)     | 172.3(5)  |
| N(4)-Pt(2)-P(3)     | 95.7(6)   |
| P(4)-Pt(2)-P(3)     | 94.0(3)   |
| N(1)#1-Zn(1)-N(1)   | 180       |
| N(1)#1-Zn(1)-N(2)#1 | 89.8(8)   |
| N(1)-Zn(1)-N(2)#1   | 90.2(8)   |
| N(1)#1-Zn(1)-N(2)   | 90.2(8)   |
| N(1)-Zn(1)-N(2)     | 89.8(8)   |
| N(2)#1-Zn(1)-N(2)   | 180       |
| C(41)-P(1)-C(45)    | 104(2)    |

|                   |           |
|-------------------|-----------|
| C(41)-P(1)-C(43)  | 112(2)    |
| C(45)-P(1)-C(43)  | 104(2)    |
| C(41)-P(1)-Pt(1)  | 105.1(13) |
| C(45)-P(1)-Pt(1)  | 107.3(15) |
| C(43)-P(1)-Pt(1)  | 122.1(15) |
| C(39)-P(2)-C(35)  | 101(2)    |
| C(39)-P(2)-C(37)  | 105.9(19) |
| C(35)-P(2)-C(37)  | 103.1(18) |
| C(39)-P(2)-Pt(1)  | 119.1(15) |
| C(35)-P(2)-Pt(1)  | 110.2(13) |
| C(37)-P(2)-Pt(1)  | 115.8(13) |
| C(53)-P(3)-C(55)  | 111(2)    |
| C(53)-P(3)-C(57)  | 97(2)     |
| C(55)-P(3)-C(57)  | 97(2)     |
| C(53)-P(3)-Pt(2)  | 116.9(17) |
| C(55)-P(3)-Pt(2)  | 122.5(14) |
| C(57)-P(3)-Pt(2)  | 107.2(12) |
| C(51)-P(4)-C(49)  | 104(3)    |
| C(51)-P(4)-C(47)  | 101.3(18) |
| C(49)-P(4)-C(47)  | 106(2)    |
| C(51)-P(4)-Pt(2)  | 119(2)    |
| C(49)-P(4)-Pt(2)  | 109.7(11) |
| C(47)-P(4)-Pt(2)  | 115.6(13) |
| C(21)-O(2)-Pt(1)  | 110.0(18) |
| C(34)-O(3)-Pt(2)  | 111.9(16) |
| C(1)-N(1)-C(4)    | 103.6(18) |
| C(1)-N(1)-Zn(1)   | 129.8(15) |
| C(4)-N(1)-Zn(1)   | 126.6(17) |
| C(6)-N(2)-C(9)    | 108(2)    |
| C(6)-N(2)-Zn(1)   | 127.6(18) |
| C(9)-N(2)-Zn(1)   | 124.3(16) |
| C(13)-N(3)-C(14)  | 126(2)    |
| C(13)-N(3)-Pt(1)  | 115.5(16) |
| C(14)-N(3)-Pt(1)  | 118.2(16) |
| C(19)-N(4)-C(18)  | 120(2)    |
| C(19)-N(4)-Pt(2)  | 122.1(19) |
| C(18)-N(4)-Pt(2)  | 116(2)    |
| N(1)-C(1)-C(2)    | 113(2)    |
| N(1)-C(1)-C(10)#1 | 123(2)    |
| C(2)-C(1)-C(10)#1 | 124(2)    |
| C(3)-C(2)-C(1)    | 109(2)    |
| C(3)-C(2)-H(2)    | 125.7     |
| C(1)-C(2)-H(2)    | 125.7     |



|                    |           |
|--------------------|-----------|
| C(2)-C(3)-C(4)     | 105(2)    |
| C(2)-C(3)-H(3)     | 127.6     |
| C(4)-C(3)-H(3)     | 127.6     |
| N(1)-C(4)-C(5)     | 126(2)    |
| N(1)-C(4)-C(3)     | 110(2)    |
| C(5)-C(4)-C(3)     | 124(2)    |
| C(6)-C(5)-C(4)     | 124(2)    |
| C(6)-C(5)-C(11)    | 118(2)    |
| C(4)-C(5)-C(11)    | 117(2)    |
| N(2)-C(6)-C(5)     | 125(2)    |
| N(2)-C(6)-C(7)     | 110(2)    |
| C(5)-C(6)-C(7)     | 125(2)    |
| C(8)-C(7)-C(6)     | 106(2)    |
| C(8)-C(7)-H(7)     | 126.9     |
| C(6)-C(7)-H(7)     | 126.9     |
| C(7)-C(8)-C(9)     | 105(2)    |
| C(7)-C(8)-H(8)     | 127.7     |
| C(9)-C(8)-H(8)     | 127.7     |
| C(10)-C(9)-N(2)    | 127(2)    |
| C(10)-C(9)-C(8)    | 122(2)    |
| N(2)-C(9)-C(8)     | 111(2)    |
| C(9)-C(10)-C(1)#1  | 125(2)    |
| C(9)-C(10)-C(16)   | 122(2)    |
| C(1)#1-C(10)-C(16) | 111.6(19) |
| C(12)-C(11)-C(15)  | 122(2)    |
| C(12)-C(11)-C(5)   | 119(3)    |
| C(15)-C(11)-C(5)   | 119(3)    |
| C(11)-C(12)-C(13)  | 117(3)    |
| C(11)-C(12)-H(12)  | 121.7     |
| C(13)-C(12)-H(12)  | 121.7     |
| N(3)-C(13)-C(12)   | 121(3)    |
| N(3)-C(13)-H(13)   | 119.7     |
| C(12)-C(13)-H(13)  | 119.7     |
| N(3)-C(14)-C(15)   | 118(2)    |
| N(3)-C(14)-H(14)   | 121       |
| C(15)-C(14)-H(14)  | 121       |
| C(11)-C(15)-C(14)  | 117(2)    |
| C(11)-C(15)-H(15)  | 121.5     |
| C(14)-C(15)-H(15)  | 121.5     |
| C(17)-C(16)-C(20)  | 118(2)    |
| C(17)-C(16)-C(10)  | 124(2)    |
| C(20)-C(16)-C(10)  | 117(2)    |
| C(16)-C(17)-C(18)  | 120(3)    |

|                   |        |
|-------------------|--------|
| C(16)-C(17)-H(17) | 120    |
| C(18)-C(17)-H(17) | 120    |
| N(4)-C(18)-C(17)  | 121(3) |
| N(4)-C(18)-H(18)  | 119.7  |
| C(17)-C(18)-H(18) | 119.7  |
| N(4)-C(19)-C(20)  | 123(3) |
| N(4)-C(19)-H(19)  | 118.3  |
| C(20)-C(19)-H(19) | 118.3  |
| C(19)-C(20)-C(16) | 117(3) |
| C(19)-C(20)-H(20) | 121.7  |
| C(16)-C(20)-H(20) | 121.7  |
| O(1)-C(21)-O(2)   | 132(3) |
| O(1)-C(21)-C(22)  | 114(3) |
| O(2)-C(21)-C(22)  | 113(3) |
| C(27)-C(22)-C(23) | 119(3) |
| C(27)-C(22)-C(21) | 122(2) |
| C(23)-C(22)-C(21) | 119(2) |
| C(24)-C(23)-C(22) | 118(3) |
| C(24)-C(23)-H(23) | 120.9  |
| C(22)-C(23)-H(23) | 120.9  |
| C(25)-C(24)-C(23) | 125(3) |
| C(25)-C(24)-H(24) | 117.7  |
| C(23)-C(24)-H(24) | 117.7  |
| C(24)-C(25)-C(26) | 116(3) |
| C(24)-C(25)-C(28) | 127(2) |
| C(26)-C(25)-C(28) | 117(2) |
| C(25)-C(26)-C(27) | 120(3) |
| C(25)-C(26)-H(26) | 119.8  |
| C(27)-C(26)-H(26) | 119.8  |
| C(22)-C(27)-C(26) | 122(3) |
| C(22)-C(27)-H(27) | 119.2  |
| C(26)-C(27)-H(27) | 119.2  |
| C(25)-C(28)-C(33) | 121(2) |
| C(25)-C(28)-C(29) | 121(2) |
| C(33)-C(28)-C(29) | 117(3) |
| C(30)-C(29)-C(28) | 121(3) |
| C(30)-C(29)-H(29) | 119.4  |
| C(28)-C(29)-H(29) | 119.4  |
| C(29)-C(30)-C(31) | 122(3) |
| C(29)-C(30)-H(30) | 119.1  |
| C(31)-C(30)-H(30) | 119.1  |
| C(32)-C(31)-C(30) | 117(3) |
| C(32)-C(31)-C(34) | 123(2) |

|                     |        |
|---------------------|--------|
| C(30)-C(31)-C(34)   | 119(2) |
| C(33)-C(32)-C(31)   | 121(3) |
| C(33)-C(32)-H(32)   | 119.3  |
| C(31)-C(32)-H(32)   | 119.3  |
| C(32)-C(33)-C(28)   | 122(3) |
| C(32)-C(33)-H(33)   | 119.1  |
| C(28)-C(33)-H(33)   | 119.1  |
| O(4)-C(34)-O(3)     | 126(3) |
| O(4)-C(34)-C(31)    | 121(3) |
| O(3)-C(34)-C(31)    | 113(2) |
| C(36)-C(35)-P(2)    | 112(3) |
| C(36)-C(35)-H(35A)  | 109.3  |
| P(2)-C(35)-H(35A)   | 109.3  |
| C(36)-C(35)-H(35B)  | 109.3  |
| P(2)-C(35)-H(35B)   | 109.3  |
| H(35A)-C(35)-H(35B) | 108    |
| C(35)-C(36)-H(36A)  | 109.5  |
| C(35)-C(36)-H(36B)  | 109.5  |
| H(36A)-C(36)-H(36B) | 109.5  |
| C(35)-C(36)-H(36C)  | 109.5  |
| H(36A)-C(36)-H(36C) | 109.5  |
| H(36B)-C(36)-H(36C) | 109.5  |
| C(38)-C(37)-P(2)    | 115(3) |
| C(38)-C(37)-H(37A)  | 108.6  |
| P(2)-C(37)-H(37A)   | 108.6  |
| C(38)-C(37)-H(37B)  | 108.6  |
| P(2)-C(37)-H(37B)   | 108.6  |
| H(37A)-C(37)-H(37B) | 107.6  |
| C(37)-C(38)-H(38A)  | 109.5  |
| C(37)-C(38)-H(38B)  | 109.5  |
| H(38A)-C(38)-H(38B) | 109.5  |
| C(37)-C(38)-H(38C)  | 109.5  |
| H(38A)-C(38)-H(38C) | 109.5  |
| H(38B)-C(38)-H(38C) | 109.5  |
| C(40)-C(39)-P(2)    | 112(2) |
| C(40)-C(39)-H(39A)  | 109.3  |
| P(2)-C(39)-H(39A)   | 109.3  |
| C(40)-C(39)-H(39B)  | 109.3  |
| P(2)-C(39)-H(39B)   | 109.3  |
| H(39A)-C(39)-H(39B) | 107.9  |
| C(39)-C(40)-H(40A)  | 109.5  |
| C(39)-C(40)-H(40B)  | 109.5  |
| H(40A)-C(40)-H(40B) | 109.5  |

|                     |        |
|---------------------|--------|
| C(39)-C(40)-H(40C)  | 109.5  |
| H(40A)-C(40)-H(40C) | 109.5  |
| H(40B)-C(40)-H(40C) | 109.5  |
| C(42)-C(41)-P(1)    | 109(2) |
| C(42)-C(41)-H(41A)  | 109.8  |
| P(1)-C(41)-H(41A)   | 109.8  |
| C(42)-C(41)-H(41B)  | 109.8  |
| P(1)-C(41)-H(41B)   | 109.8  |
| H(41A)-C(41)-H(41B) | 108.3  |
| C(41)-C(42)-H(42A)  | 109.5  |
| C(41)-C(42)-H(42B)  | 109.5  |
| H(42A)-C(42)-H(42B) | 109.5  |
| C(41)-C(42)-H(42C)  | 109.5  |
| H(42A)-C(42)-H(42C) | 109.5  |
| H(42B)-C(42)-H(42C) | 109.5  |
| C(44)-C(43)-P(1)    | 110(3) |
| C(44)-C(43)-H(43A)  | 109.7  |
| P(1)-C(43)-H(43A)   | 109.7  |
| C(44)-C(43)-H(43B)  | 109.7  |
| P(1)-C(43)-H(43B)   | 109.7  |
| H(43A)-C(43)-H(43B) | 108.2  |
| C(43)-C(44)-H(44A)  | 109.5  |
| C(43)-C(44)-H(44B)  | 109.5  |
| H(44A)-C(44)-H(44B) | 109.5  |
| C(43)-C(44)-H(44C)  | 109.5  |
| H(44A)-C(44)-H(44C) | 109.5  |
| H(44B)-C(44)-H(44C) | 109.5  |
| C(46)-C(45)-P(1)    | 122(4) |
| C(46)-C(45)-H(45A)  | 106.8  |
| P(1)-C(45)-H(45A)   | 106.8  |
| C(46)-C(45)-H(45B)  | 106.8  |
| P(1)-C(45)-H(45B)   | 106.8  |
| H(45A)-C(45)-H(45B) | 106.6  |
| C(45)-C(46)-H(46A)  | 109.5  |
| C(45)-C(46)-H(46B)  | 109.5  |
| H(46A)-C(46)-H(46B) | 109.5  |
| C(45)-C(46)-H(46C)  | 109.5  |
| H(46A)-C(46)-H(46C) | 109.5  |
| H(46B)-C(46)-H(46C) | 109.5  |
| C(48)-C(47)-P(4)    | 113(2) |
| C(48)-C(47)-H(47A)  | 109.1  |
| P(4)-C(47)-H(47A)   | 109.1  |
| C(48)-C(47)-H(47B)  | 109.1  |

|                     |        |
|---------------------|--------|
| P(4)-C(47)-H(47B)   | 109.1  |
| H(47A)-C(47)-H(47B) | 107.8  |
| C(47)-C(48)-H(48A)  | 109.5  |
| C(47)-C(48)-H(48B)  | 109.5  |
| H(48A)-C(48)-H(48B) | 109.5  |
| C(47)-C(48)-H(48C)  | 109.5  |
| H(48A)-C(48)-H(48C) | 109.5  |
| H(48B)-C(48)-H(48C) | 109.5  |
| C(50)-C(49)-P(4)    | 110(3) |
| C(50)-C(49)-H(49A)  | 109.6  |
| P(4)-C(49)-H(49A)   | 109.6  |
| C(50)-C(49)-H(49B)  | 109.6  |
| P(4)-C(49)-H(49B)   | 109.6  |
| H(49A)-C(49)-H(49B) | 108.1  |
| C(49)-C(50)-H(50A)  | 109.5  |
| C(49)-C(50)-H(50B)  | 109.5  |
| H(50A)-C(50)-H(50B) | 109.5  |
| C(49)-C(50)-H(50C)  | 109.5  |
| H(50A)-C(50)-H(50C) | 109.5  |
| H(50B)-C(50)-H(50C) | 109.5  |
| C(52)-C(51)-P(4)    | 112(3) |
| C(52)-C(51)-H(51A)  | 109.2  |
| P(4)-C(51)-H(51A)   | 109.2  |
| C(52)-C(51)-H(51B)  | 109.2  |
| P(4)-C(51)-H(51B)   | 109.2  |
| H(51A)-C(51)-H(51B) | 107.9  |
| C(51)-C(52)-H(52A)  | 109.5  |
| C(51)-C(52)-H(52B)  | 109.5  |
| H(52A)-C(52)-H(52B) | 109.5  |
| C(51)-C(52)-H(52C)  | 109.5  |
| H(52A)-C(52)-H(52C) | 109.5  |
| H(52B)-C(52)-H(52C) | 109.5  |
| C(54)-C(53)-P(3)    | 124(4) |
| C(54)-C(53)-H(53A)  | 106.3  |
| P(3)-C(53)-H(53A)   | 106.3  |
| C(54)-C(53)-H(53B)  | 106.3  |
| P(3)-C(53)-H(53B)   | 106.3  |
| H(53A)-C(53)-H(53B) | 106.4  |
| C(53)-C(54)-H(54A)  | 109.5  |
| C(53)-C(54)-H(54B)  | 109.5  |
| H(54A)-C(54)-H(54B) | 109.5  |
| C(53)-C(54)-H(54C)  | 109.5  |
| H(54A)-C(54)-H(54C) | 109.5  |

|                     |        |
|---------------------|--------|
| H(54B)-C(54)-H(54C) | 109.5  |
| C(55)-C(56)-H(56A)  | 109.5  |
| C(55)-C(56)-H(56B)  | 109.5  |
| H(56A)-C(56)-H(56B) | 109.5  |
| C(55)-C(56)-H(56C)  | 109.5  |
| H(56A)-C(56)-H(56C) | 109.5  |
| H(56B)-C(56)-H(56C) | 109.5  |
| C(56)-C(55)-P(3)    | 113(3) |
| C(56)-C(55)-H(55A)  | 109    |
| P(3)-C(55)-H(55A)   | 109    |
| C(56)-C(55)-H(55B)  | 109    |
| P(3)-C(55)-H(55B)   | 109    |
| H(55A)-C(55)-H(55B) | 107.8  |
| C(58)-C(57)-P(3)    | 113(3) |
| C(58)-C(57)-H(57A)  | 109.1  |
| P(3)-C(57)-H(57A)   | 109.1  |
| C(58)-C(57)-H(57B)  | 109.1  |
| P(3)-C(57)-H(57B)   | 109.1  |
| H(57A)-C(57)-H(57B) | 107.8  |
| C(57)-C(58)-H(58A)  | 109.5  |
| C(57)-C(58)-H(58B)  | 109.5  |
| H(58A)-C(58)-H(58B) | 109.5  |
| C(57)-C(58)-H(58C)  | 109.5  |
| H(58A)-C(58)-H(58C) | 109.5  |
| H(58B)-C(58)-H(58C) | 109.5  |

Symmetry transformations used to generate equivalent atoms:

#1 -x+2,-y,-z+1

**Table 5.** Atomic coordinates ( $\times 10^4$ ) and equivalent isotropic displacement parameters ( $\text{\AA}^2 \times 10^3$ ) for **BT3**.  $U(\text{eq})$  is defined as one third of the trace of the orthogonalized  $U^{ij}$  tensor.

|       | x        | y        | z        | U(eq)   |
|-------|----------|----------|----------|---------|
| Pt(1) | 6023(1)  | 5750(2)  | 4546(1)  | 92(2)   |
| O(1)  | 4438(16) | 2350(40) | 2539(18) | 90(14)  |
| O(2)  | 3772(14) | 2770(30) | 2624(17) | 108(12) |
| C(23) | 4860(20) | 4450(30) | 3644(15) | 87(13)  |
| C(24) | 5107(14) | 4030(40) | 3390(20) | 89(14)  |
| C(25) | 4890(20) | 3490(30) | 3055(18) | 90(14)  |
| C(26) | 4430(20) | 3370(30) | 2970(16) | 87(13)  |
| C(27) | 4180(15) | 3790(40) | 3220(20) | 92(14)  |
| C(28) | 4400(20) | 4330(30) | 3559(18) | 88(14)  |

|        |          |          |          |         |
|--------|----------|----------|----------|---------|
| P(1)   | 6486(9)  | 6353(17) | 5153(10) | 103(7)  |
| Pt(2)  | 3342(2)  | 1949(4)  | 2203(2)  | 141(3)  |
| P(2)   | 6004(9)  | 6885(14) | 4089(9)  | 91(7)   |
| Zn(03) | 5000     | 0        | 5000     | 82(5)   |
| O(3)   | 5615(18) | 5070(30) | 4027(17) | 81(9)   |
| C(2)   | 5586(12) | 4390(30) | 5084(15) | 67(12)  |
| N(5)   | 5949(12) | 4570(20) | 4908(13) | 47(8)   |
| C(3)   | 6177(11) | 3890(30) | 4767(13) | 34(8)   |
| C(4)   | 6043(14) | 3040(20) | 4803(15) | 55(12)  |
| C(5)   | 5681(15) | 2860(20) | 4979(16) | 67(11)  |
| C(6)   | 5453(13) | 3540(30) | 5120(16) | 72(13)  |
| O(4)   | 4957(18) | 5350(40) | 4230(20) | 100(15) |
| P(3)   | 3184(10) | 2970(20) | 1691(9)  | 124(7)  |
| P(4)   | 2867(11) | 990(30)  | 1891(13) | 171(13) |
| C(7)   | 5530(20) | 2030(50) | 5030(30) | 66(12)  |
| C(8)   | 5628(18) | 1590(30) | 5365(14) | 69(12)  |
| C(9)   | 5949(18) | 1840(30) | 5750(17) | 71(15)  |
| C(10)  | 5968(17) | 1170(40) | 6062(13) | 74(15)  |
| C(11)  | 5659(18) | 510(30)  | 5870(17) | 74(14)  |
| N(3)   | 5449(15) | 770(30)  | 5439(15) | 65(11)  |
| C(12)  | 5208(18) | 1790(40) | 4631(16) | 80(13)  |
| C(13)  | 5100(20) | 2270(30) | 4240(20) | 84(15)  |
| C(14)  | 4760(20) | 1820(40) | 3935(15) | 81(15)  |
| C(15)  | 4655(17) | 1060(30) | 4139(19) | 79(13)  |
| N(2)   | 4931(18) | 1040(30) | 4569(17) | 75(7)   |
| C(16)  | 4430(30) | 360(60)  | 3980(30) | 77(9)   |
| C(17)  | 4180(30) | 450(60)  | 3560(30) | 75(14)  |
| C(18)  | 4180(30) | 300(60)  | 3180(30) | 85(14)  |
| C(19)  | 3990(30) | 580(70)  | 2800(30) | 96(15)  |
| N(4)   | 3640(30) | 1130(60) | 2740(30) | 118(15) |
| C(21)  | 3470(30) | 1290(60) | 3080(30) | 98(16)  |
| C(20)  | 3760(30) | 940(50)  | 3510(30) | 76(14)  |
| C(1A)  | 5710(30) | 7640(50) | 4100(30) | 105(14) |
| C(2A)  | 5190(30) | 7550(60) | 3970(40) | 140(30) |
| C(38)  | 5910(30) | 6620(50) | 3500(30) | 110(14) |
| C(39)  | 6150(30) | 5760(50) | 3430(30) | 120(20) |
| C(3A)  | 6650(30) | 7160(50) | 4170(30) | 118(16) |
| C(49)  | 2940(30) | -160(70) | 2110(40) | 170(20) |
| C(52)  | 5090(30) | 5050(40) | 3980(20) | 86(12)  |
| C(53)  | 4161(17) | 2750(50) | 2650(20) | 90(13)  |
| C(9A)  | 3390(20) | 2420(50) | 1260(20) | 125(9)  |
| C(12A) | 6440(30) | 5740(70) | 5680(20) | 128(17) |
| C(13A) | 3880(20) | 2320(70) | 1230(30) | 136(12) |

|        |          |           |          |         |
|--------|----------|-----------|----------|---------|
| C(14A) | 6983(18) | 6420(70)  | 4340(40) | 160(30) |
| C(15A) | 5820(20) | 7440(60)  | 5270(30) | 110(16) |
| C(16A) | 6700(30) | 6050(60)  | 6130(30) | 130(30) |
| C(17A) | 6320(20) | 7450(30)  | 5270(30) | 96(13)  |
| C(19A) | 2570(40) | -850(50)  | 1930(40) | 200(40) |
| C(22A) | 1980(30) | 1010(100) | 2120(50) | 240(40) |
| C(23A) | 2360(30) | 730(90)   | 1910(40) | 200(20) |
| C(25A) | 7054(17) | 6250(40)  | 5080(30) | 119(15) |
| C(28A) | 7330(20) | 5410(60)  | 5130(40) | 170(40) |
| C(29A) | 2400(40) | 710(80)   | 950(20)  | 210(40) |
| C(31A) | 2800(30) | 570(70)   | 1348(19) | 174(19) |
| C(32A) | 2890(30) | 3870(50)  | 1360(30) | 136(17) |
| C(33A) | 3060(40) | 4330(70)  | 1000(30) | 190(40) |
| C(34A) | 3530(20) | 3940(30)  | 1720(30) | 136(16) |
| C(35A) | 3420(30) | 4870(30)  | 1830(30) | 150(20) |

**Table 6.** Bond lengths [ $\text{\AA}$ ] and angles [ $^\circ$ ] for **BT3**.

|             |         |
|-------------|---------|
| Pt(1)-O(3)  | 2.09(6) |
| Pt(1)-N(5)  | 2.19(3) |
| Pt(1)-P(2)  | 2.26(2) |
| Pt(1)-P(1)  | 2.29(3) |
| O(1)-C(53)  | 1.17(2) |
| O(2)-C(53)  | 1.18(2) |
| O(2)-Pt(2)  | 2.06(2) |
| C(23)-C(24) | 1.39    |
| C(23)-C(28) | 1.39    |
| C(23)-C(52) | 1.46(2) |
| C(24)-C(25) | 1.39    |
| C(24)-H(24) | 0.95    |
| C(25)-C(26) | 1.39    |
| C(25)-H(25) | 0.95    |
| C(26)-C(27) | 1.39    |
| C(26)-C(53) | 1.48(2) |
| C(27)-C(28) | 1.39    |
| C(27)-H(27) | 0.95    |
| C(28)-H(28) | 0.95    |
| P(1)-C(25A) | 1.82(2) |
| P(1)-C(17A) | 1.83(2) |
| P(1)-C(12A) | 1.96(7) |
| Pt(2)-N(4)  | 2.13(9) |
| Pt(2)-P(4)  | 2.13(3) |
| Pt(2)-P(3)  | 2.23(3) |



|               |          |
|---------------|----------|
| P(2)-C(1A)    | 1.48(8)  |
| P(2)-C(38)    | 1.87(9)  |
| P(2)-C(3A)    | 1.96(9)  |
| Zn(03)-N(3)#1 | 2.07(4)  |
| Zn(03)-N(3)   | 2.07(4)  |
| Zn(03)-N(2)   | 2.08(4)  |
| Zn(03)-N(2)#1 | 2.08(4)  |
| O(3)-C(52)    | 1.58(10) |
| C(2)-N(5)     | 1.39     |
| C(2)-C(6)     | 1.39     |
| C(2)-H(2)     | 0.95     |
| N(5)-C(3)     | 1.39     |
| C(3)-C(4)     | 1.39     |
| C(3)-H(3)     | 0.95     |
| C(4)-C(5)     | 1.39     |
| C(4)-H(4)     | 0.95     |
| C(5)-C(7)     | 1.37(8)  |
| C(5)-C(6)     | 1.39     |
| C(6)-H(6)     | 0.95     |
| O(4)-C(52)    | 1.07(8)  |
| P(3)-C(34A)   | 1.83(2)  |
| P(3)-C(9A)    | 1.85(2)  |
| P(3)-C(32A)   | 1.83(7)  |
| P(4)-C(23A)   | 1.63(9)  |
| P(4)-C(31A)   | 1.81(2)  |
| P(4)-C(49)    | 1.90(10) |
| C(7)-C(8)     | 1.23(8)  |
| C(7)-C(12)    | 1.46(8)  |
| C(8)-N(3)     | 1.42     |
| C(8)-C(9)     | 1.42     |
| C(9)-C(10)    | 1.42     |
| C(9)-H(9)     | 0.95     |
| C(10)-C(11)   | 1.42     |
| C(10)-H(10)   | 0.95     |
| C(11)-N(3)    | 1.42     |
| C(11)-C(16)#1 | 1.46(9)  |
| C(12)-C(13)   | 1.42     |
| C(12)-N(2)    | 1.42     |
| C(13)-C(14)   | 1.42     |
| C(13)-H(13)   | 0.95     |
| C(14)-C(15)   | 1.42     |
| C(14)-H(14)   | 0.95     |
| C(15)-C(16)   | 1.31(9)  |

|                |          |
|----------------|----------|
| C(15)-N(2)     | 1.42     |
| C(16)-C(17)    | 1.38(10) |
| C(17)-C(18)    | 1.22(10) |
| C(17)-C(20)    | 1.46(10) |
| C(18)-C(19)    | 1.28(10) |
| C(18)-H(18)    | 0.95     |
| C(19)-N(4)     | 1.35(11) |
| C(19)-H(19)    | 0.95     |
| N(4)-C(21)     | 1.33(11) |
| C(21)-C(20)    | 1.54(10) |
| C(21)-H(21)    | 0.95     |
| C(20)-H(20)    | 0.95     |
| C(1A)-C(2A)    | 1.54(2)  |
| C(1A)-H(1A1)   | 0.99     |
| C(1A)-H(1A2)   | 0.99     |
| C(2A)-H(2A1)   | 0.989    |
| C(2A)-H(2A2)   | 0.9894   |
| C(2A)-H(2A3)   | 0.9893   |
| C(38)-C(39)    | 1.54(2)  |
| C(38)-H(38A)   | 0.99     |
| C(38)-H(38B)   | 0.99     |
| C(39)-C(35A)#2 | 2.20(11) |
| C(39)-H(39A)   | 1.0085   |
| C(39)-H(39B)   | 1.0091   |
| C(39)-H(39C)   | 1.0095   |
| C(3A)-C(14A)   | 1.54(2)  |
| C(3A)-H(3A1)   | 0.99     |
| C(3A)-H(3A2)   | 0.99     |
| C(49)-C(19A)   | 1.54(2)  |
| C(49)-H(49A)   | 0.99     |
| C(49)-H(49B)   | 0.99     |
| C(9A)-C(13A)   | 1.55(2)  |
| C(9A)-H(9A1)   | 0.99     |
| C(9A)-H(9A2)   | 0.99     |
| C(12A)-C(16A)  | 1.54(2)  |
| C(12A)-H(12A)  | 0.99     |
| C(12A)-H(12B)  | 0.99     |
| C(13A)-H(13A)  | 0.999    |
| C(13A)-H(13B)  | 0.9967   |
| C(13A)-H(13C)  | 0.996    |
| C(14A)-H(14A)  | 0.9801   |
| C(14A)-H(14B)  | 0.9801   |
| C(14A)-H(14C)  | 0.9801   |

|               |         |
|---------------|---------|
| C(15A)-C(17A) | 1.53(2) |
| C(15A)-H(15A) | 0.98    |
| C(15A)-H(15B) | 0.98    |
| C(15A)-H(15C) | 0.98    |
| C(16A)-H(16A) | 0.9802  |
| C(16A)-H(16B) | 0.9802  |
| C(16A)-H(16C) | 0.9802  |
| C(17A)-H(17A) | 0.99    |
| C(17A)-H(17B) | 0.99    |
| C(19A)-H(19A) | 1.0149  |
| C(19A)-H(19B) | 1.0127  |
| C(19A)-H(19C) | 1.0131  |
| C(22A)-C(23A) | 1.54(2) |
| C(22A)-H(22A) | 1.1408  |
| C(22A)-H(22B) | 1.1551  |
| C(22A)-H(22C) | 1.1401  |
| C(23A)-H(23A) | 0.99    |
| C(23A)-H(23B) | 0.99    |
| C(25A)-C(28A) | 1.53(2) |
| C(25A)-H(25A) | 0.99    |
| C(25A)-H(25B) | 0.99    |
| C(28A)-H(28A) | 1.0135  |
| C(28A)-H(28B) | 1.0125  |
| C(28A)-H(28C) | 1.0124  |
| C(29A)-C(31A) | 1.54(2) |
| C(29A)-H(29A) | 1.0091  |
| C(29A)-H(29B) | 1.0093  |
| C(29A)-H(29C) | 1.0078  |
| C(31A)-H(31A) | 0.99    |
| C(31A)-H(31B) | 0.99    |
| C(32A)-C(33A) | 1.55(2) |
| C(32A)-H(32A) | 0.99    |
| C(32A)-H(32B) | 0.99    |
| C(33A)-H(33A) | 1.0001  |
| C(33A)-H(33B) | 1.0009  |
| C(33A)-H(33C) | 0.9989  |
| C(34A)-C(35A) | 1.53(2) |
| C(34A)-H(34A) | 0.99    |
| C(34A)-H(34B) | 0.99    |
| C(35A)-H(35A) | 0.9801  |
| C(35A)-H(35B) | 0.9801  |
| C(35A)-H(35C) | 0.9801  |

|                    |           |
|--------------------|-----------|
| O(3)-Pt(1)-N(5)    | 83.3(16)  |
| O(3)-Pt(1)-P(2)    | 87.9(15)  |
| N(5)-Pt(1)-P(2)    | 170.8(13) |
| O(3)-Pt(1)-P(1)    | 173.8(15) |
| N(5)-Pt(1)-P(1)    | 90.8(12)  |
| P(2)-Pt(1)-P(1)    | 98.1(10)  |
| C(53)-O(2)-Pt(2)   | 120(3)    |
| C(24)-C(23)-C(28)  | 120       |
| C(24)-C(23)-C(52)  | 120(6)    |
| C(28)-C(23)-C(52)  | 120(6)    |
| C(25)-C(24)-C(23)  | 120       |
| C(25)-C(24)-H(24)  | 120       |
| C(23)-C(24)-H(24)  | 120       |
| C(24)-C(25)-C(26)  | 120       |
| C(24)-C(25)-H(25)  | 120       |
| C(26)-C(25)-H(25)  | 120       |
| C(25)-C(26)-C(27)  | 120       |
| C(25)-C(26)-C(53)  | 125(5)    |
| C(27)-C(26)-C(53)  | 115(5)    |
| C(28)-C(27)-C(26)  | 120       |
| C(28)-C(27)-H(27)  | 120       |
| C(26)-C(27)-H(27)  | 120       |
| C(27)-C(28)-C(23)  | 120       |
| C(27)-C(28)-H(28)  | 120       |
| C(23)-C(28)-H(28)  | 120       |
| C(25A)-P(1)-C(17A) | 116(3)    |
| C(25A)-P(1)-C(12A) | 110(3)    |
| C(17A)-P(1)-C(12A) | 101(4)    |
| C(25A)-P(1)-Pt(1)  | 106(4)    |
| C(17A)-P(1)-Pt(1)  | 113(3)    |
| C(12A)-P(1)-Pt(1)  | 111(3)    |
| O(2)-Pt(2)-N(4)    | 76(3)     |
| O(2)-Pt(2)-P(4)    | 168(2)    |
| N(4)-Pt(2)-P(4)    | 94(2)     |
| O(2)-Pt(2)-P(3)    | 91.9(19)  |
| N(4)-Pt(2)-P(3)    | 167(2)    |
| P(4)-Pt(2)-P(3)    | 98.3(13)  |
| C(1A)-P(2)-C(38)   | 105(5)    |
| C(1A)-P(2)-C(3A)   | 116(4)    |
| C(38)-P(2)-C(3A)   | 94(5)     |
| C(1A)-P(2)-Pt(1)   | 120(4)    |
| C(38)-P(2)-Pt(1)   | 117(3)    |
| C(3A)-P(2)-Pt(1)   | 103(2)    |

|                      |        |
|----------------------|--------|
| N(3)#1-Zn(03)-N(3)   | 180(5) |
| N(3)#1-Zn(03)-N(2)   | 93(5)  |
| N(3)-Zn(03)-N(2)     | 87(2)  |
| N(3)#1-Zn(03)-N(2)#1 | 87(7)  |
| N(3)-Zn(03)-N(2)#1   | 93(6)  |
| N(2)-Zn(03)-N(2)#1   | 180(6) |
| C(52)-O(3)-Pt(1)     | 118(3) |
| N(5)-C(2)-C(6)       | 120    |
| N(5)-C(2)-H(2)       | 120    |
| C(6)-C(2)-H(2)       | 120    |
| C(2)-N(5)-C(3)       | 120    |
| C(2)-N(5)-Pt(1)      | 125(2) |
| C(3)-N(5)-Pt(1)      | 109(2) |
| N(5)-C(3)-C(4)       | 120    |
| N(5)-C(3)-H(3)       | 120    |
| C(4)-C(3)-H(3)       | 120    |
| C(5)-C(4)-C(3)       | 120    |
| C(5)-C(4)-H(4)       | 120    |
| C(3)-C(4)-H(4)       | 120    |
| C(7)-C(5)-C(4)       | 123(5) |
| C(7)-C(5)-C(6)       | 117(5) |
| C(4)-C(5)-C(6)       | 120    |
| C(5)-C(6)-C(2)       | 120    |
| C(5)-C(6)-H(6)       | 120    |
| C(2)-C(6)-H(6)       | 120    |
| C(34A)-P(3)-C(9A)    | 96(2)  |
| C(34A)-P(3)-C(32A)   | 67(4)  |
| C(9A)-P(3)-C(32A)    | 97(3)  |
| C(34A)-P(3)-Pt(2)    | 121(3) |
| C(9A)-P(3)-Pt(2)     | 100(3) |
| C(32A)-P(3)-Pt(2)    | 160(3) |
| C(23A)-P(4)-C(31A)   | 94(5)  |
| C(23A)-P(4)-C(49)    | 77(6)  |
| C(31A)-P(4)-C(49)    | 89(6)  |
| C(23A)-P(4)-Pt(2)    | 135(4) |
| C(31A)-P(4)-Pt(2)    | 126(4) |
| C(49)-P(4)-Pt(2)     | 118(3) |
| C(8)-C(7)-C(5)       | 127(7) |
| C(8)-C(7)-C(12)      | 125(7) |
| C(5)-C(7)-C(12)      | 108(6) |
| C(7)-C(8)-N(3)       | 128(6) |
| C(7)-C(8)-C(9)       | 124(6) |
| N(3)-C(8)-C(9)       | 108    |

|                     |         |
|---------------------|---------|
| C(8)-C(9)-C(10)     | 108     |
| C(8)-C(9)-H(9)      | 126     |
| C(10)-C(9)-H(9)     | 126     |
| C(9)-C(10)-C(11)    | 108     |
| C(9)-C(10)-H(10)    | 126     |
| C(11)-C(10)-H(10)   | 126     |
| N(3)-C(11)-C(10)    | 108     |
| N(3)-C(11)-C(16)#1  | 119(5)  |
| C(10)-C(11)-C(16)#1 | 132(5)  |
| C(8)-N(3)-C(11)     | 108     |
| C(8)-N(3)-Zn(03)    | 128(3)  |
| C(11)-N(3)-Zn(03)   | 124(3)  |
| C(13)-C(12)-N(2)    | 108     |
| C(13)-C(12)-C(7)    | 126(5)  |
| N(2)-C(12)-C(7)     | 126(5)  |
| C(12)-C(13)-C(14)   | 108     |
| C(12)-C(13)-H(13)   | 126     |
| C(14)-C(13)-H(13)   | 126     |
| C(15)-C(14)-C(13)   | 108     |
| C(15)-C(14)-H(14)   | 126     |
| C(13)-C(14)-H(14)   | 126     |
| C(16)-C(15)-C(14)   | 132(6)  |
| C(16)-C(15)-N(2)    | 119(6)  |
| C(14)-C(15)-N(2)    | 108     |
| C(15)-N(2)-C(12)    | 108     |
| C(15)-N(2)-Zn(03)   | 126(4)  |
| C(12)-N(2)-Zn(03)   | 125(3)  |
| C(15)-C(16)-C(17)   | 113(8)  |
| C(15)-C(16)-C(11)#1 | 139(8)  |
| C(17)-C(16)-C(11)#1 | 108(7)  |
| C(18)-C(17)-C(16)   | 144(10) |
| C(18)-C(17)-C(20)   | 102(9)  |
| C(16)-C(17)-C(20)   | 114(8)  |
| C(17)-C(18)-C(19)   | 140(10) |
| C(17)-C(18)-H(18)   | 110.4   |
| C(19)-C(18)-H(18)   | 110.1   |
| C(18)-C(19)-N(4)    | 120(10) |
| C(18)-C(19)-H(19)   | 119.9   |
| N(4)-C(19)-H(19)    | 120     |
| C(21)-N(4)-C(19)    | 117(9)  |
| C(21)-N(4)-Pt(2)    | 112(8)  |
| C(19)-N(4)-Pt(2)    | 131(8)  |
| N(4)-C(21)-C(20)    | 114(9)  |

|                       |        |
|-----------------------|--------|
| N(4)-C(21)-H(21)      | 123.1  |
| C(20)-C(21)-H(21)     | 123.2  |
| C(17)-C(20)-C(21)     | 125(9) |
| C(17)-C(20)-H(20)     | 117.6  |
| C(21)-C(20)-H(20)     | 117.4  |
| P(2)-C(1A)-C(2A)      | 121(6) |
| P(2)-C(1A)-H(1A1)     | 107    |
| C(2A)-C(1A)-H(1A1)    | 106.9  |
| P(2)-C(1A)-H(1A2)     | 107    |
| C(2A)-C(1A)-H(1A2)    | 107    |
| H(1A1)-C(1A)-H(1A2)   | 106.8  |
| C(1A)-C(2A)-H(2A1)    | 110.1  |
| C(1A)-C(2A)-H(2A2)    | 110.6  |
| H(2A1)-C(2A)-H(2A2)   | 108.5  |
| C(1A)-C(2A)-H(2A3)    | 110.4  |
| H(2A1)-C(2A)-H(2A3)   | 108.6  |
| H(2A2)-C(2A)-H(2A3)   | 108.6  |
| C(39)-C(38)-P(2)      | 112(6) |
| C(39)-C(38)-H(38A)    | 109.1  |
| P(2)-C(38)-H(38A)     | 109.4  |
| C(39)-C(38)-H(38B)    | 109.3  |
| P(2)-C(38)-H(38B)     | 109.3  |
| H(38A)-C(38)-H(38B)   | 107.9  |
| C(38)-C(39)-C(35A)#2  | 159(7) |
| C(38)-C(39)-H(39A)    | 112.1  |
| C(35A)#2-C(39)-H(39A) | 61.4   |
| C(38)-C(39)-H(39B)    | 112.3  |
| C(35A)#2-C(39)-H(39B) | 56     |
| H(39A)-C(39)-H(39B)   | 106.6  |
| C(38)-C(39)-H(39C)    | 112.5  |
| C(35A)#2-C(39)-H(39C) | 88.7   |
| H(39A)-C(39)-H(39C)   | 106.5  |
| H(39B)-C(39)-H(39C)   | 106.5  |
| C(14A)-C(3A)-P(2)     | 117(5) |
| C(14A)-C(3A)-H(3A1)   | 108.3  |
| P(2)-C(3A)-H(3A1)     | 108.2  |
| C(14A)-C(3A)-H(3A2)   | 108.2  |
| P(2)-C(3A)-H(3A2)     | 107.9  |
| H(3A1)-C(3A)-H(3A2)   | 107.3  |
| C(19A)-C(49)-P(4)     | 120(6) |
| C(19A)-C(49)-H(49A)   | 107.5  |
| P(4)-C(49)-H(49A)     | 107.5  |
| C(19A)-C(49)-H(49B)   | 106.9  |

|                      |        |
|----------------------|--------|
| P(4)-C(49)-H(49B)    | 107.3  |
| H(49A)-C(49)-H(49B)  | 106.9  |
| O(4)-C(52)-C(23)     | 128(9) |
| O(4)-C(52)-O(3)      | 119(6) |
| C(23)-C(52)-O(3)     | 111(7) |
| O(1)-C(53)-O(2)      | 142(5) |
| O(1)-C(53)-C(26)     | 104(5) |
| O(2)-C(53)-C(26)     | 114(4) |
| C(13A)-C(9A)-P(3)    | 127(3) |
| C(13A)-C(9A)-H(9A1)  | 106.3  |
| P(3)-C(9A)-H(9A1)    | 105.7  |
| C(13A)-C(9A)-H(9A2)  | 104.7  |
| P(3)-C(9A)-H(9A2)    | 105.6  |
| H(9A1)-C(9A)-H(9A2)  | 106.1  |
| C(16A)-C(12A)-P(1)   | 121(6) |
| C(16A)-C(12A)-H(12A) | 107.2  |
| P(1)-C(12A)-H(12A)   | 107.2  |
| C(16A)-C(12A)-H(12B) | 106.9  |
| P(1)-C(12A)-H(12B)   | 107    |
| H(12A)-C(12A)-H(12B) | 106.8  |
| C(9A)-C(13A)-H(13A)  | 112.2  |
| C(9A)-C(13A)-H(13B)  | 110.9  |
| H(13A)-C(13A)-H(13B) | 107.9  |
| C(9A)-C(13A)-H(13C)  | 110.4  |
| H(13A)-C(13A)-H(13C) | 107.5  |
| H(13B)-C(13A)-H(13C) | 107.9  |
| C(3A)-C(14A)-H(14A)  | 109.6  |
| C(3A)-C(14A)-H(14B)  | 109.3  |
| H(14A)-C(14A)-H(14B) | 109.5  |
| C(3A)-C(14A)-H(14C)  | 109.6  |
| H(14A)-C(14A)-H(14C) | 109.5  |
| H(14B)-C(14A)-H(14C) | 109.5  |
| C(17A)-C(15A)-H(15A) | 109.5  |
| C(17A)-C(15A)-H(15B) | 109.5  |
| H(15A)-C(15A)-H(15B) | 109.5  |
| C(17A)-C(15A)-H(15C) | 109.4  |
| H(15A)-C(15A)-H(15C) | 109.5  |
| H(15B)-C(15A)-H(15C) | 109.5  |
| C(12A)-C(16A)-H(16A) | 109.3  |
| C(12A)-C(16A)-H(16B) | 109.6  |
| H(16A)-C(16A)-H(16B) | 109.5  |
| C(12A)-C(16A)-H(16C) | 109.5  |
| H(16A)-C(16A)-H(16C) | 109.4  |



|                      |         |
|----------------------|---------|
| H(16B)-C(16A)-H(16C) | 109.5   |
| C(15A)-C(17A)-P(1)   | 109(5)  |
| C(15A)-C(17A)-H(17A) | 110     |
| P(1)-C(17A)-H(17A)   | 109.8   |
| C(15A)-C(17A)-H(17B) | 109.9   |
| P(1)-C(17A)-H(17B)   | 110.1   |
| H(17A)-C(17A)-H(17B) | 108.3   |
| C(49)-C(19A)-H(19A)  | 113.2   |
| C(49)-C(19A)-H(19B)  | 112.5   |
| H(19A)-C(19A)-H(19B) | 106.1   |
| C(49)-C(19A)-H(19C)  | 112.6   |
| H(19A)-C(19A)-H(19C) | 105.9   |
| H(19B)-C(19A)-H(19C) | 106.1   |
| C(23A)-C(22A)-H(22A) | 125.4   |
| C(23A)-C(22A)-H(22B) | 127.3   |
| H(22A)-C(22A)-H(22B) | 88.7    |
| C(23A)-C(22A)-H(22C) | 124.6   |
| H(22A)-C(22A)-H(22C) | 89.7    |
| H(22B)-C(22A)-H(22C) | 89.3    |
| C(22A)-C(23A)-P(4)   | 142(10) |
| C(22A)-C(23A)-H(23A) | 101.6   |
| P(4)-C(23A)-H(23A)   | 102.1   |
| C(22A)-C(23A)-H(23B) | 101.5   |
| P(4)-C(23A)-H(23B)   | 101.1   |
| H(23A)-C(23A)-H(23B) | 104.6   |
| C(28A)-C(25A)-P(1)   | 126(3)  |
| C(28A)-C(25A)-H(25A) | 106.1   |
| P(1)-C(25A)-H(25A)   | 105.9   |
| C(28A)-C(25A)-H(25B) | 105.8   |
| P(1)-C(25A)-H(25B)   | 105.9   |
| H(25A)-C(25A)-H(25B) | 106.2   |
| C(25A)-C(28A)-H(28A) | 112.9   |
| C(25A)-C(28A)-H(28B) | 112.6   |
| H(28A)-C(28A)-H(28B) | 106.1   |
| C(25A)-C(28A)-H(28C) | 112.6   |
| H(28A)-C(28A)-H(28C) | 106     |
| H(28B)-C(28A)-H(28C) | 106.1   |
| C(31A)-C(29A)-H(29A) | 112.3   |
| C(31A)-C(29A)-H(29B) | 112.4   |
| H(29A)-C(29A)-H(29B) | 106.5   |
| C(31A)-C(29A)-H(29C) | 112.1   |
| H(29A)-C(29A)-H(29C) | 106.7   |
| H(29B)-C(29A)-H(29C) | 106.5   |

|                       |        |
|-----------------------|--------|
| C(29A)-C(31A)-P(4)    | 127(4) |
| C(29A)-C(31A)-H(31A)  | 105.7  |
| P(4)-C(31A)-H(31A)    | 105.5  |
| C(29A)-C(31A)-H(31B)  | 105.5  |
| P(4)-C(31A)-H(31B)    | 105.6  |
| H(31A)-C(31A)-H(31B)  | 106.1  |
| C(33A)-C(32A)-P(3)    | 124(5) |
| C(33A)-C(32A)-H(32A)  | 106.8  |
| P(3)-C(32A)-H(32A)    | 106.2  |
| C(33A)-C(32A)-H(32B)  | 105.9  |
| P(3)-C(32A)-H(32B)    | 106.2  |
| H(32A)-C(32A)-H(32B)  | 106.4  |
| C(32A)-C(33A)-H(33A)  | 111.5  |
| C(32A)-C(33A)-H(33B)  | 111.9  |
| H(33A)-C(33A)-H(33B)  | 107.4  |
| C(32A)-C(33A)-H(33C)  | 110.8  |
| H(33A)-C(33A)-H(33C)  | 107.4  |
| H(33B)-C(33A)-H(33C)  | 107.6  |
| C(35A)-C(34A)-P(3)    | 128(4) |
| C(35A)-C(34A)-H(34A)  | 104.9  |
| P(3)-C(34A)-H(34A)    | 105.3  |
| C(35A)-C(34A)-H(34B)  | 105.7  |
| P(3)-C(34A)-H(34B)    | 105.4  |
| H(34A)-C(34A)-H(34B)  | 106    |
| C(34A)-C(35A)-C(39)#2 | 108(6) |
| C(34A)-C(35A)-H(35A)  | 109.3  |
| C(39)#2-C(35A)-H(35A) | 133.6  |
| C(34A)-C(35A)-H(35B)  | 109.1  |
| C(39)#2-C(35A)-H(35B) | 30.7   |
| H(35A)-C(35A)-H(35B)  | 109.5  |
| C(34A)-C(35A)-H(35C)  | 110    |
| C(39)#2-C(35A)-H(35C) | 81.8   |
| H(35A)-C(35A)-H(35C)  | 109.5  |
| H(35B)-C(35A)-H(35C)  | 109.5  |

Symmetry transformations used to generate equivalent atoms:

#1 -x+1,-y,-z+1 #2 -x+1,y,-z+1/2

**Table 7.** Atomic coordinates ( $\times 10^4$ ) and equivalent isotropic displacement parameters ( $\text{\AA}^2 \times 10^3$ ) for **BT4**.  $U(\text{eq})$  is defined as one third of the trace of the orthogonalized  $U^{ij}$  tensor.

|       | x        | y       | z       | $U(\text{eq})$ |
|-------|----------|---------|---------|----------------|
| Pt(1) | 11311(1) | 5735(1) | 5811(1) | 95(1)          |

|       |           |          |          |         |
|-------|-----------|----------|----------|---------|
| Pt(2) | 7728(1)   | 7226(1)  | 636(1)   | 127(1)  |
| Pt(3) | 2824(1)   | 6741(1)  | 3123(1)  | 203(1)  |
| Pt(4) | 6519(1)   | 5208(1)  | 8238(1)  | 172(1)  |
| Zn(1) | 7006(1)   | 6042(1)  | 4265(2)  | 83(1)   |
| P(4)  | 6875(7)   | 7432(6)  | -16(7)   | 196(6)  |
| P(5)  | 2678(7)   | 7130(8)  | 2258(11) | 270(12) |
| P(6)  | 1911(7)   | 6815(10) | 3164(12) | 349(17) |
| P(7)  | 6053(8)   | 5041(7)  | 8926(8)  | 220(8)  |
| P(8)  | 7423(9)   | 5218(10) | 8884(10) | 311(15) |
| O(1)  | 11074(9)  | 5931(6)  | 4915(11) | 96(5)   |
| O(2)  | 10664(9)  | 5368(7)  | 4489(10) | 98(6)   |
| O(3)  | 8509(10)  | 7020(8)  | 1324(13) | 123(7)  |
| O(4)  | 8572(12)  | 7579(9)  | 1931(14) | 143(9)  |
| O(5)  | 3110(11)  | 6473(12) | 4045(15) | 164(10) |
| O(6)  | 3109(16)  | 5833(13) | 3583(19) | 197(13) |
| O(8)  | 5735(12)  | 4709(9)  | 7128(15) | 148(9)  |
| O(9W) | 6813(10)  | 5532(6)  | 3685(14) | 134(8)  |
| N(5)  | 10369(10) | 5770(5)  | 5630(12) | 79(6)   |
| C(29) | 7265(11)  | 6464(5)  | 1929(12) | 118(9)  |
| C(26) | 7189(10)  | 6720(7)  | 2383(9)  | 101(7)  |
| C(27) | 7199(10)  | 7129(6)  | 2297(10) | 109(8)  |
| C(28) | 7284(10)  | 7282(5)  | 1757(12) | 118(9)  |
| N(6)  | 7360(9)   | 7025(7)  | 1304(9)  | 112(7)  |
| C(30) | 7350(10)  | 6616(7)  | 1390(10) | 118(9)  |
| P(1)  | 11480(4)  | 5553(3)  | 6803(6)  | 118(3)  |
| N(8)  | 6769(10)  | 5365(8)  | 7456(9)  | 131(8)  |
| C(36) | 6914(10)  | 5087(6)  | 7073(12) | 133(10) |
| C(37) | 6976(10)  | 5206(7)  | 6504(11) | 120(9)  |
| C(38) | 6892(10)  | 5602(8)  | 6318(10) | 113(8)  |
| C(39) | 6747(10)  | 5880(6)  | 6702(13) | 124(9)  |
| C(40) | 6685(10)  | 5761(7)  | 7271(11) | 134(9)  |
| C(34) | 4679(16)  | 6780(13) | 3820(20) | 151(12) |
| C(31) | 4895(14)  | 6427(11) | 3566(19) | 105(8)  |
| C(32) | 4492(15)  | 6219(12) | 3203(19) | 118(9)  |
| C(33) | 3891(15)  | 6298(13) | 3047(19) | 121(10) |
| N(7)  | 3724(13)  | 6654(12) | 3245(17) | 133(9)  |
| C(35) | 4153(17)  | 6884(14) | 3650(20) | 153(12) |
| P(2)  | 12265(4)  | 5759(3)  | 5846(6)  | 118(4)  |
| N(1)  | 7590(7)   | 5853(6)  | 5128(8)  | 92(6)   |
| C(1)  | 7465(6)   | 5726(6)  | 5673(10) | 85(7)   |
| C(2)  | 8009(8)   | 5627(6)  | 6147(8)  | 76(6)   |
| C(4)  | 8470(6)   | 5693(6)  | 5894(10) | 83(7)   |
| C(4') | 8212(8)   | 5833(6)  | 5264(9)  | 82(6)   |

|       |           |          |          |         |
|-------|-----------|----------|----------|---------|
| P(3)  | 8330(7)   | 7402(4)  | 65(7)    | 156(5)  |
| C(13) | 5808(7)   | 6451(6)  | 3392(9)  | 76(6)   |
| C(3)  | 5593(6)   | 6646(7)  | 2798(10) | 95(8)   |
| C(11) | 6080(9)   | 6714(7)  | 2584(8)  | 94(8)   |
| C(3') | 6596(7)   | 6560(6)  | 3047(10) | 79(6)   |
| N(3)  | 6427(7)   | 6397(5)  | 3546(8)  | 73(5)   |
| C(5)  | 8552(12)  | 5945(8)  | 4904(16) | 81(6)   |
| N(2)  | 7717(7)   | 6223(6)  | 3999(9)  | 79(5)   |
| C(6)  | 8320(8)   | 6119(7)  | 4300(9)  | 91(7)   |
| C(7)  | 8642(6)   | 6242(7)  | 3903(11) | 99(8)   |
| C(8)  | 8237(8)   | 6422(6)  | 3356(9)  | 86(7)   |
| C(9)  | 7666(7)   | 6410(6)  | 3415(9)  | 81(7)   |
| C(10) | 7149(13)  | 6555(9)  | 2988(16) | 91(7)   |
| C(14) | 5528(12)  | 6340(9)  | 3760(15) | 82(7)   |
| N(4)  | 6333(7)   | 6041(6)  | 4657(9)  | 85(6)   |
| C(16) | 5732(8)   | 6151(6)  | 4362(8)  | 83(7)   |
| C(17) | 5416(6)   | 6041(6)  | 4772(10) | 80(7)   |
| C(18) | 5822(8)   | 5864(6)  | 5320(8)  | 76(7)   |
| C(19) | 6389(7)   | 5864(6)  | 5249(9)  | 82(7)   |
| C(21) | 9180(12)  | 5890(8)  | 5118(15) | 76(7)   |
| C(22) | 9434(13)  | 5513(8)  | 5232(15) | 83(8)   |
| C(23) | 10027(11) | 5454(7)  | 5472(13) | 61(7)   |
| C(24) | 10169(12) | 6134(7)  | 5516(14) | 67(7)   |
| C(25) | 9561(12)  | 6201(9)  | 5268(15) | 83(7)   |
| C(41) | 10723(15) | 5746(12) | 4433(19) | 92(8)   |
| C(42) | 10358(14) | 5954(11) | 3887(18) | 90(7)   |
| C(43) | 10256(12) | 6374(10) | 3935(16) | 90(7)   |
| C(44) | 9597(10)  | 6379(5)  | 2847(12) | 93(7)   |
| C(45) | 9869(8)   | 6578(7)  | 3413(10) | 92(7)   |
| C(48) | 9762(9)   | 6981(7)  | 3463(9)  | 88(7)   |
| C(49) | 9382(10)  | 7184(5)  | 2947(12) | 119(9)  |
| C(51) | 9110(9)   | 6985(7)  | 2381(10) | 102(8)  |
| C(52) | 9218(9)   | 6583(7)  | 2331(9)  | 103(8)  |
| C(46) | 9652(14)  | 5960(10) | 2799(17) | 95(7)   |
| C(47) | 10059(16) | 5748(12) | 3337(19) | 113(9)  |
| C(55) | 3886(18)  | 5607(15) | 4740(20) | 139(10) |
| C(57) | 3190(20)  | 6070(20) | 4010(30) | 146(11) |
| C(58) | 3887(19)  | 6255(16) | 5190(20) | 148(11) |
| C(59) | 3675(17)  | 5986(16) | 4710(20) | 130(9)  |
| C(60) | 4285(10)  | 5464(10) | 5327(11) | 128(9)  |
| C(61) | 4482(12)  | 5072(9)  | 5406(12) | 142(10) |
| C(62) | 4888(12)  | 4951(6)  | 5980(14) | 132(10) |
| C(63) | 5097(9)   | 5221(9)  | 6473(10) | 105(8)  |

|        |           |          |           |         |
|--------|-----------|----------|-----------|---------|
| C(56)  | 4900(11)  | 5613(8)  | 6394(12)  | 106(8)  |
| C(56') | 4494(11)  | 5734(7)  | 5821(15)  | 123(9)  |
| C(65)  | 11822(17) | 5084(12) | 7020(20)  | 128(10) |
| C(66)  | 11570(20) | 4771(14) | 6640(20)  | 168(17) |
| C(67)  | 10812(14) | 5521(15) | 7030(20)  | 168(12) |
| C(71)  | 12810(14) | 5513(13) | 6450(20)  | 155(11) |
| C(72)  | 13459(15) | 5528(14) | 6470(30)  | 185(18) |
| C(73)  | 12240(19) | 5220(15) | 5030(30)  | 184(16) |
| C(75)  | 12520(20) | 6325(14) | 6010(40)  | 230(20) |
| C(76)  | 12210(20) | 6609(14) | 5720(40)  | 230(20) |
| C(77)  | 8840(20)  | 7775(13) | 510(20)   | 160(10) |
| C(78)  | 8592(19)  | 8141(13) | 680(30)   | 172(16) |
| C(79)  | 8860(20)  | 7002(14) | 140(20)   | 169(12) |
| C(200) | 6918(13)  | 5727(9)  | 5708(17)  | 93(7)   |
| C(304) | 6980(30)  | 8163(17) | 550(30)   | 219(19) |
| C(303) | 6810(20)  | 8015(18) | -90(30)   | 208(13) |
| C(307) | 1650(30)  | 6080(30) | 3310(40)  | 390(30) |
| C(306) | 1680(30)  | 6480(20) | 3670(30)  | 360(20) |
| O(305) | 5715(10)  | 5266(8)  | 7593(12)  | 125(7)  |
| C(302) | 8580(20)  | 7631(17) | -1050(30) | 220(20) |
| C(301) | 8150(20)  | 7594(14) | -630(20)  | 171(11) |
| C(308) | 1350(20)  | 6910(30) | 2500(30)  | 360(20) |
| C(311) | 2390(30)  | 7660(20) | 2310(40)  | 303(19) |
| C(313) | 11910(20) | 5911(14) | 7410(20)  | 164(12) |
| C(314) | 8695(18)  | 7239(14) | 1910(20)  | 121(9)  |
| C(315) | 4316(17)  | 6143(13) | 5800(20)  | 133(10) |
| C(316) | 5529(17)  | 5070(14) | 7060(20)  | 104(8)  |
| C(317) | 12319(19) | 5645(14) | 5110(20)  | 157(11) |
| C(318) | 11650(30) | 6355(12) | 7320(30)  | 250(30) |
| C(319) | 10240(20) | 5760(20) | 6910(40)  | 310(30) |
| C(4S)  | 2200(30)  | 7030(20) | 1540(30)  | 298(18) |
| C(8S)  | 3460(30)  | 7620(20) | 1780(40)  | 340(30) |
| C(10S) | 2810(30)  | 7850(20) | 2920(40)  | 320(30) |
| C(12S) | 5280(20)  | 5310(20) | 8690(30)  | 250(16) |
| C(14S) | 5920(20)  | 4510(10) | 8790(30)  | 269(16) |
| C(18S) | 3430(20)  | 7270(20) | 2210(30)  | 288(18) |
| C(19S) | 2370(30)  | 7260(30) | 4370(30)  | 450(40) |
| C(20S) | 6620(30)  | 7000(20) | -850(30)  | 270(20) |
| C(29S) | 6390(30)  | 5030(20) | 9730(30)  | 264(16) |
| C(34S) | 5950(30)  | 4880(30) | 10060(30) | 330(30) |
| C(35S) | 4840(20)  | 5110(20) | 8990(30)  | 310(30) |
| C(36S) | 6430(40)  | 4205(15) | 9010(50)  | 400(40) |
| C(37S) | 6540(30)  | 7450(20) | -800(30)  | 243(15) |

|        |           |          |          |          |
|--------|-----------|----------|----------|----------|
| C(38S) | 6278(18)  | 7360(20) | 260(20)  | 224(14)  |
| C(39S) | 5639(16)  | 7510(20) | -50(30)  | 290(30)  |
| C(40S) | 1880(20)  | 7205(17) | 3720(30) | 380(20)  |
| C(41S) | 760(20)   | 6990(30) | 2610(30) | 370(30)  |
| C(43S) | 2410(40)  | 6610(20) | 1410(40) | 350(30)  |
| C(44S) | 7570(40)  | 4340(14) | 9050(50) | 470(40)  |
| C(45S) | 7560(30)  | 5614(15) | 9470(30) | 340(20)  |
| C(46S) | 8050(30)  | 5390(30) | 8750(30) | 360(20)  |
| C(47S) | 7780(30)  | 4767(14) | 9270(30) | 370(20)  |
| C(48S) | 8650(20)  | 5520(30) | 9230(30) | 390(30)  |
| C(49S) | 7810(40)  | 5940(30) | 9140(40) | 410(40)  |
| C(50S) | 8590(30)  | 6631(15) | -130(30) | 199(18)  |
| S(500) | 10652(8)  | 7317(6)  | 5641(10) | 232(8)   |
| O(501) | 10572(18) | 7669(9)  | 5930(18) | 286(18)  |
| O(502) | 11123(15) | 7081(12) | 6002(19) | 318(19)  |
| O(503) | 10155(12) | 7112(10) | 5271(16) | 225(14)  |
| C(500) | 10932(15) | 7505(11) | 4981(18) | 288(14)  |
| F(501) | 11410(19) | 7735(16) | 5310(20) | 440(30)  |
| F(502) | 11071(19) | 7143(13) | 4770(20) | 368(19)  |
| F(503) | 10440(20) | 7703(13) | 4582(18) | 380(20)  |
| S(501) | 6390(20)  | 6855(10) | 7370(20) | 590(30)  |
| O(504) | 6740(30)  | 6817(15) | 6990(30) | 600(40)  |
| O(505) | 6220(30)  | 6505(12) | 7600(30) | 640(40)  |
| O(506) | 6490(30)  | 7187(14) | 7760(30) | 580(40)  |
| C(501) | 5640(30)  | 7003(16) | 6760(30) | 650(30)  |
| F(504) | 5490(30)  | 6650(20) | 6430(40) | 720(40)  |
| F(505) | 5330(30)  | 7090(20) | 7180(40) | 730(40)  |
| F(506) | 5810(30)  | 7320(17) | 6470(30) | 630(40)  |
| S(502) | 9350(30)  | 5084(15) | 7750(30) | 750(40)  |
| O(507) | 8970(40)  | 5320(20) | 7950(40) | 700(40)  |
| O(508) | 9500(40)  | 4713(16) | 8030(40) | 720(40)  |
| O(509) | 9310(40)  | 5110(20) | 7110(30) | 710(50)  |
| C(502) | 10080(30) | 5370(20) | 8130(40) | 770(40)  |
| F(507) | 10210(40) | 5250(30) | 8760(30) | 790(50)  |
| F(508) | 10420(40) | 5210(30) | 7790(50) | 770(50)  |
| F(509) | 9870(50)  | 5755(17) | 7970(50) | 820(50)  |
| S(503) | 4020(40)  | 7247(17) | -230(40) | 1090(60) |
| O(510) | 3960(60)  | 7000(20) | 250(60)  | 1060(70) |
| O(511) | 4530(50)  | 7210(30) | -380(70) | 1100(70) |
| O(512) | 3500(50)  | 7330(30) | -720(60) | 1080(70) |
| C(503) | 4160(40)  | 7752(18) | 200(50)  | 1090(70) |
| F(510) | 4750(50)  | 7710(20) | 580(70)  | 1050(70) |
| F(511) | 3740(60)  | 7750(20) | 500(70)  | 1060(70) |

**Table 8.** Bond lengths [Å] and angles [°] for **BT4**.

|              |           |
|--------------|-----------|
| Pt(1)-O(1)   | 2.01(2)   |
| Pt(1)-N(5)   | 2.16(2)   |
| Pt(1)-P(1)   | 2.207(12) |
| Pt(1)-P(2)   | 2.264(9)  |
| Pt(2)-N(6)   | 2.088(15) |
| Pt(2)-O(3)   | 2.11(3)   |
| Pt(2)-P(4)   | 2.194(15) |
| Pt(2)-P(3)   | 2.302(12) |
| Pt(3)-N(7)   | 2.10(3)   |
| Pt(3)-O(5)   | 2.15(3)   |
| Pt(3)-P(6)   | 2.236(14) |
| Pt(3)-P(5)   | 2.266(16) |
| Pt(4)-O(305) | 2.00(3)   |
| Pt(4)-N(8)   | 2.100(17) |
| Pt(4)-P(8)   | 2.17(2)   |
| Pt(4)-P(7)   | 2.256(14) |
| Zn(1)-N(1)   | 2.072(16) |
| Zn(1)-N(2)   | 2.077(13) |
| Zn(1)-N(4)   | 2.080(13) |
| Zn(1)-O(9W)  | 2.11(2)   |
| Zn(1)-N(3)   | 2.113(15) |
| P(4)-C(37S)  | 1.68(5)   |
| P(4)-C(38S)  | 1.76(5)   |
| P(4)-C(303)  | 1.97(6)   |
| P(4)-C(20S)  | 2.29(7)   |
| P(5)-C(4S)   | 1.67(7)   |
| P(5)-C(18S)  | 1.90(5)   |
| P(5)-C(311)  | 1.92(7)   |
| P(6)-C(308)  | 1.67(6)   |
| P(6)-C(306)  | 1.82(2)   |
| P(6)-C(40S)  | 1.83(2)   |
| P(7)-C(29S)  | 1.72(5)   |
| P(7)-C(14S)  | 1.82(2)   |
| P(7)-C(12S)  | 1.97(6)   |
| P(8)-C(46S)  | 1.72(6)   |
| P(8)-C(47S)  | 1.81(2)   |
| P(8)-C(45S)  | 1.82(2)   |
| O(1)-C(41)   | 1.29(4)   |
| O(2)-C(41)   | 1.29(4)   |

|              |           |
|--------------|-----------|
| O(3)-C(314)  | 1.44(5)   |
| O(4)-C(314)  | 1.19(4)   |
| O(5)-C(57)   | 1.37(6)   |
| O(6)-C(57)   | 1.21(6)   |
| O(8)-C(316)  | 1.30(4)   |
| N(5)-C(24)   | 1.31(3)   |
| N(5)-C(23)   | 1.32(3)   |
| C(29)-C(26)  | 1.39      |
| C(29)-C(30)  | 1.39      |
| C(29)-H(29)  | 0.95      |
| C(26)-C(27)  | 1.39      |
| C(26)-C(10)  | 1.50(3)   |
| C(27)-C(28)  | 1.39      |
| C(27)-H(27)  | 0.95      |
| C(28)-N(6)   | 1.39      |
| C(28)-H(28)  | 0.95      |
| N(6)-C(30)   | 1.39      |
| C(30)-H(500) | 0.95      |
| P(1)-C(65)   | 1.77(4)   |
| P(1)-C(67)   | 1.840(19) |
| P(1)-C(313)  | 1.85(4)   |
| N(8)-C(36)   | 1.39      |
| N(8)-C(40)   | 1.39      |
| C(36)-C(37)  | 1.39      |
| C(36)-H(36)  | 0.95      |
| C(37)-C(38)  | 1.39      |
| C(37)-H(37)  | 0.95      |
| C(38)-C(39)  | 1.39      |
| C(38)-C(200) | 1.45(3)   |
| C(39)-C(40)  | 1.39      |
| C(39)-H(39)  | 0.95      |
| C(40)-H(40)  | 0.95      |
| C(34)-C(35)  | 1.24(4)   |
| C(34)-C(31)  | 1.49(5)   |
| C(34)-H(34)  | 0.95      |
| C(31)-C(32)  | 1.25(4)   |
| C(31)-C(14)  | 1.46(4)   |
| C(32)-C(33)  | 1.39(4)   |
| C(32)-H(32)  | 0.95      |
| C(33)-N(7)   | 1.38(5)   |
| C(33)-H(33)  | 0.95      |
| N(7)-C(35)   | 1.36(5)   |
| C(35)-H(35)  | 0.95      |



|              |         |
|--------------|---------|
| P(2)-C(71)   | 1.74(4) |
| P(2)-C(317)  | 1.75(5) |
| P(2)-C(75)   | 1.99(5) |
| N(1)-C(1)    | 1.42    |
| N(1)-C(4')   | 1.42    |
| C(1)-C(200)  | 1.34(3) |
| C(1)-C(2)    | 1.42    |
| C(2)-C(4)    | 1.42    |
| C(2)-H(2)    | 0.95    |
| C(4)-C(4')   | 1.42    |
| C(4)-H(4)    | 0.95    |
| C(4')-C(5)   | 1.38(3) |
| P(3)-C(301)  | 1.61(4) |
| P(3)-C(77)   | 1.80(5) |
| P(3)-C(79)   | 1.81(4) |
| C(13)-C(14)  | 1.28(3) |
| C(13)-C(3)   | 1.42    |
| C(13)-N(3)   | 1.42    |
| C(3)-C(11)   | 1.42    |
| C(3)-H(3)    | 0.95    |
| C(11)-C(3')  | 1.42    |
| C(11)-H(11)  | 0.95    |
| C(3')-C(10)  | 1.38(3) |
| C(3')-N(3)   | 1.42    |
| C(5)-C(6)    | 1.41(3) |
| C(5)-C(21)   | 1.43(4) |
| N(2)-C(9)    | 1.42    |
| N(2)-C(6)    | 1.42    |
| C(6)-C(7)    | 1.42    |
| C(7)-C(8)    | 1.42    |
| C(7)-H(7)    | 0.95    |
| C(8)-C(9)    | 1.42    |
| C(8)-H(8)    | 0.95    |
| C(9)-C(10)   | 1.38(3) |
| C(14)-C(16)  | 1.42(3) |
| N(4)-C(19)   | 1.42    |
| N(4)-C(16)   | 1.42    |
| C(16)-C(17)  | 1.42    |
| C(17)-C(18)  | 1.42    |
| C(17)-H(17)  | 0.95    |
| C(18)-C(19)  | 1.42    |
| C(18)-H(18)  | 0.95    |
| C(19)-C(200) | 1.42(3) |

|              |         |
|--------------|---------|
| C(21)-C(25)  | 1.36(4) |
| C(21)-C(22)  | 1.39(4) |
| C(22)-C(23)  | 1.36(3) |
| C(22)-H(22)  | 0.95    |
| C(23)-H(23)  | 0.95    |
| C(24)-C(25)  | 1.39(3) |
| C(24)-H(24)  | 0.95    |
| C(25)-H(25)  | 0.95    |
| C(41)-C(42)  | 1.43(4) |
| C(42)-C(47)  | 1.39(5) |
| C(42)-C(43)  | 1.45(4) |
| C(43)-C(45)  | 1.41(3) |
| C(43)-H(43)  | 0.95    |
| C(44)-C(45)  | 1.39    |
| C(44)-C(52)  | 1.39    |
| C(44)-C(46)  | 1.42(3) |
| C(45)-C(48)  | 1.39    |
| C(48)-C(49)  | 1.39    |
| C(48)-H(48)  | 0.95    |
| C(49)-C(51)  | 1.39    |
| C(49)-H(49)  | 0.95    |
| C(51)-C(52)  | 1.39    |
| C(51)-C(314) | 1.46(4) |
| C(52)-H(52)  | 0.95    |
| C(46)-C(47)  | 1.46(4) |
| C(46)-H(46)  | 0.95    |
| C(47)-H(47)  | 0.95    |
| C(55)-C(59)  | 1.36(6) |
| C(55)-C(60)  | 1.43(4) |
| C(55)-H(55)  | 0.95    |
| C(57)-C(59)  | 1.63(7) |
| C(58)-C(59)  | 1.38(6) |
| C(58)-C(315) | 1.46(5) |
| C(58)-H(58)  | 0.95    |
| C(60)-C(61)  | 1.39    |
| C(60)-C(56') | 1.39    |
| C(61)-C(62)  | 1.39    |
| C(61)-H(61)  | 0.95    |
| C(62)-C(63)  | 1.39    |
| C(62)-H(62)  | 0.95    |
| C(63)-C(56)  | 1.39    |
| C(63)-C(316) | 1.47(5) |
| C(56)-C(56') | 1.39    |

|               |         |
|---------------|---------|
| C(56)-H(56)   | 0.95    |
| C(56')-C(315) | 1.44(4) |
| C(65)-C(66)   | 1.36(5) |
| C(65)-H(65A)  | 0.99    |
| C(65)-H(65B)  | 0.99    |
| C(66)-H(66A)  | 0.98    |
| C(66)-H(66B)  | 0.98    |
| C(66)-H(66C)  | 0.98    |
| C(67)-C(319)  | 1.54(2) |
| C(67)-H(67A)  | 0.99    |
| C(67)-H(67B)  | 0.99    |
| C(71)-C(72)   | 1.54(4) |
| C(71)-H(71A)  | 0.99    |
| C(71)-H(71B)  | 0.99    |
| C(72)-H(72A)  | 0.98    |
| C(72)-H(72B)  | 0.98    |
| C(72)-H(72C)  | 0.98    |
| C(73)-C(317)  | 1.44(5) |
| C(73)-H(73A)  | 0.98    |
| C(73)-H(73B)  | 0.98    |
| C(73)-H(73C)  | 0.98    |
| C(75)-C(76)   | 1.26(6) |
| C(75)-H(75A)  | 0.99    |
| C(75)-H(75B)  | 0.99    |
| C(76)-H(76A)  | 0.9818  |
| C(76)-H(76B)  | 0.9818  |
| C(76)-H(76C)  | 0.9818  |
| C(77)-C(78)   | 1.47(5) |
| C(77)-H(77A)  | 0.99    |
| C(77)-H(77B)  | 0.99    |
| C(78)-H(78A)  | 0.98    |
| C(78)-H(78B)  | 0.98    |
| C(78)-H(78C)  | 0.98    |
| C(79)-C(50S)  | 1.44(6) |
| C(79)-H(79A)  | 0.99    |
| C(79)-H(79B)  | 0.99    |
| C(304)-C(303) | 1.44(7) |
| C(304)-H(501) | 0.98    |
| C(304)-H(502) | 0.98    |
| C(304)-H(30C) | 0.98    |
| C(303)-H(503) | 0.99    |
| C(303)-H(504) | 0.99    |
| C(307)-C(306) | 1.55(2) |

|               |         |
|---------------|---------|
| C(307)-H(30D) | 1.1182  |
| C(307)-H(30E) | 1.1157  |
| C(307)-H(30F) | 1.1154  |
| C(306)-H(30G) | 0.99    |
| C(306)-H(30H) | 0.99    |
| O(305)-C(316) | 1.30(4) |
| C(302)-C(301) | 1.60(5) |
| C(302)-H(505) | 0.9802  |
| C(302)-H(506) | 0.9802  |
| C(302)-H(30I) | 0.9802  |
| C(301)-H(30J) | 0.99    |
| C(301)-H(30K) | 0.99    |
| C(308)-C(41S) | 1.55(2) |
| C(308)-H(30L) | 0.99    |
| C(308)-H(30M) | 0.99    |
| C(311)-C(10S) | 1.55(2) |
| C(311)-H(31A) | 0.99    |
| C(311)-H(31B) | 0.99    |
| C(313)-C(318) | 1.61(6) |
| C(313)-H(317) | 0.99    |
| C(313)-H(318) | 0.99    |
| C(315)-H(400) | 0.95    |
| C(317)-H(315) | 0.99    |
| C(317)-H(316) | 0.99    |
| C(318)-H(310) | 0.98    |
| C(318)-H(311) | 0.98    |
| C(318)-H(312) | 0.98    |
| C(319)-H(313) | 0.98    |
| C(319)-H(31E) | 0.98    |
| C(319)-H(31F) | 0.98    |
| C(4S)-C(43S)  | 1.54(2) |
| C(4S)-H(4S1)  | 0.99    |
| C(4S)-H(4S2)  | 0.99    |
| C(8S)-C(18S)  | 1.55(2) |
| C(8S)-H(8S1)  | 1.0258  |
| C(8S)-H(8S2)  | 1.026   |
| C(8S)-H(8S3)  | 1.0253  |
| C(10S)-H(10A) | 0.9944  |
| C(10S)-H(10B) | 0.9947  |
| C(10S)-H(10C) | 0.9948  |
| C(12S)-C(35S) | 1.55(2) |
| C(12S)-H(12A) | 0.99    |
| C(12S)-H(12B) | 0.99    |

|               |         |
|---------------|---------|
| C(14S)-C(36S) | 1.55(2) |
| C(14S)-H(14A) | 0.99    |
| C(14S)-H(14B) | 0.99    |
| C(18S)-H(18A) | 0.99    |
| C(18S)-H(18B) | 0.99    |
| C(19S)-C(40S) | 1.55(2) |
| C(19S)-H(19A) | 0.9813  |
| C(19S)-H(19B) | 0.9813  |
| C(19S)-H(19C) | 0.9813  |
| C(20S)-C(37S) | 1.54(2) |
| C(20S)-H(20A) | 0.98    |
| C(20S)-H(20B) | 0.98    |
| C(20S)-H(20C) | 0.98    |
| C(29S)-C(34S) | 1.54(2) |
| C(29S)-H(29A) | 0.99    |
| C(29S)-H(29B) | 0.99    |
| C(34S)-H(34A) | 1.0196  |
| C(34S)-H(34B) | 1.0208  |
| C(34S)-H(34C) | 1.0179  |
| C(35S)-H(35A) | 0.9807  |
| C(35S)-H(35B) | 0.9806  |
| C(35S)-H(35C) | 0.9806  |
| C(36S)-H(36A) | 0.9989  |
| C(36S)-H(36B) | 0.9994  |
| C(36S)-H(36C) | 0.9989  |
| C(37S)-H(37A) | 0.99    |
| C(37S)-H(37B) | 0.99    |
| C(38S)-C(39S) | 1.55(2) |
| C(38S)-H(38A) | 0.99    |
| C(38S)-H(38B) | 0.99    |
| C(39S)-H(39A) | 0.98    |
| C(39S)-H(39B) | 0.98    |
| C(39S)-H(39C) | 0.98    |
| C(40S)-H(40A) | 0.99    |
| C(40S)-H(40B) | 0.99    |
| C(41S)-H(41A) | 0.9992  |
| C(41S)-H(41B) | 0.9988  |
| C(41S)-H(41C) | 0.999   |
| C(43S)-H(43A) | 1.0837  |
| C(43S)-H(43B) | 1.0856  |
| C(43S)-H(43C) | 1.0826  |
| C(44S)-C(47S) | 1.55(2) |
| C(44S)-H(44A) | 0.9814  |

|               |           |
|---------------|-----------|
| C(44S)-H(44B) | 0.9814    |
| C(44S)-H(44C) | 0.9815    |
| C(45S)-C(49S) | 1.54(2)   |
| C(45S)-H(45A) | 0.99      |
| C(45S)-H(45B) | 0.99      |
| C(46S)-C(48S) | 1.54(2)   |
| C(46S)-H(46A) | 0.99      |
| C(46S)-H(46B) | 0.99      |
| C(47S)-H(47A) | 0.99      |
| C(47S)-H(47B) | 0.99      |
| C(48S)-H(48A) | 0.98      |
| C(48S)-H(48B) | 0.98      |
| C(48S)-H(48C) | 0.98      |
| C(49S)-H(49A) | 1.0063    |
| C(49S)-H(49B) | 1.0073    |
| C(49S)-H(49C) | 1.0067    |
| C(50S)-H(50A) | 0.98      |
| C(50S)-H(50B) | 0.98      |
| C(50S)-H(50C) | 0.98      |
| S(500)-O(503) | 1.387(19) |
| S(500)-O(501) | 1.392(19) |
| S(500)-O(502) | 1.396(19) |
| S(500)-C(500) | 1.92(5)   |
| C(500)-F(501) | 1.375(19) |
| C(500)-F(502) | 1.39(2)   |
| C(500)-F(503) | 1.40(2)   |
| S(501)-O(504) | 1.391(19) |
| S(501)-O(506) | 1.393(19) |
| S(501)-O(505) | 1.40(2)   |
| S(501)-C(501) | 1.93(5)   |
| C(501)-F(506) | 1.38(2)   |
| C(501)-F(504) | 1.39(2)   |
| C(501)-F(505) | 1.39(2)   |
| S(502)-O(508) | 1.39(2)   |
| S(502)-O(507) | 1.39(2)   |
| S(502)-O(509) | 1.40(2)   |
| S(502)-C(502) | 1.93(5)   |
| C(502)-F(507) | 1.39(2)   |
| C(502)-F(508) | 1.39(2)   |
| C(502)-F(509) | 1.40(2)   |
| S(503)-O(510) | 1.39(2)   |
| S(503)-O(512) | 1.39(2)   |
| S(503)-O(511) | 1.39(2)   |

|                    |           |
|--------------------|-----------|
| S(503)-C(503)      | 1.92(5)   |
| C(503)-F(510)      | 1.39(2)   |
| C(503)-F(511)      | 1.39(2)   |
| C(503)-F(512)      | 1.39(2)   |
| O(1)-Pt(1)-N(5)    | 82.2(9)   |
| O(1)-Pt(1)-P(1)    | 173.5(6)  |
| N(5)-Pt(1)-P(1)    | 91.9(7)   |
| O(1)-Pt(1)-P(2)    | 88.2(6)   |
| N(5)-Pt(1)-P(2)    | 170.1(7)  |
| P(1)-Pt(1)-P(2)    | 97.6(4)   |
| N(6)-Pt(2)-O(3)    | 81.6(8)   |
| N(6)-Pt(2)-P(4)    | 93.2(7)   |
| O(3)-Pt(2)-P(4)    | 174.8(7)  |
| N(6)-Pt(2)-P(3)    | 167.2(7)  |
| O(3)-Pt(2)-P(3)    | 85.6(7)   |
| P(4)-Pt(2)-P(3)    | 99.6(5)   |
| N(7)-Pt(3)-O(5)    | 80.3(11)  |
| N(7)-Pt(3)-P(6)    | 170.6(11) |
| O(5)-Pt(3)-P(6)    | 90.6(8)   |
| N(7)-Pt(3)-P(5)    | 92.9(10)  |
| O(5)-Pt(3)-P(5)    | 167.0(12) |
| P(6)-Pt(3)-P(5)    | 95.6(6)   |
| O(305)-Pt(4)-N(8)  | 81.2(8)   |
| O(305)-Pt(4)-P(8)  | 172.1(9)  |
| N(8)-Pt(4)-P(8)    | 93.0(7)   |
| O(305)-Pt(4)-P(7)  | 86.7(7)   |
| N(8)-Pt(4)-P(7)    | 167.8(8)  |
| P(8)-Pt(4)-P(7)    | 99.2(6)   |
| N(1)-Zn(1)-N(2)    | 89.7(8)   |
| N(1)-Zn(1)-N(4)    | 89.1(8)   |
| N(2)-Zn(1)-N(4)    | 161.6(8)  |
| N(1)-Zn(1)-O(9W)   | 105.5(9)  |
| N(2)-Zn(1)-O(9W)   | 95.4(9)   |
| N(4)-Zn(1)-O(9W)   | 102.6(9)  |
| N(1)-Zn(1)-N(3)    | 162.3(8)  |
| N(2)-Zn(1)-N(3)    | 90.5(7)   |
| N(4)-Zn(1)-N(3)    | 85.3(7)   |
| O(9W)-Zn(1)-N(3)   | 92.1(9)   |
| C(37S)-P(4)-C(38S) | 102(3)    |
| C(37S)-P(4)-C(303) | 83(3)     |
| C(38S)-P(4)-C(303) | 97(3)     |
| C(37S)-P(4)-Pt(2)  | 137(2)    |

|                    |           |
|--------------------|-----------|
| C(38S)-P(4)-Pt(2)  | 113.8(15) |
| C(303)-P(4)-Pt(2)  | 113.7(19) |
| C(37S)-P(4)-C(20S) | 42.3(16)  |
| C(38S)-P(4)-C(20S) | 100(3)    |
| C(303)-P(4)-C(20S) | 125(2)    |
| Pt(2)-P(4)-C(20S)  | 106.1(19) |
| C(4S)-P(5)-C(18S)  | 111(3)    |
| C(4S)-P(5)-C(311)  | 96(3)     |
| C(18S)-P(5)-C(311) | 98(3)     |
| C(4S)-P(5)-Pt(3)   | 125(3)    |
| C(18S)-P(5)-Pt(3)  | 108.2(16) |
| C(311)-P(5)-Pt(3)  | 116(2)    |
| C(308)-P(6)-C(306) | 111(3)    |
| C(308)-P(6)-C(40S) | 105(4)    |
| C(306)-P(6)-C(40S) | 86(4)     |
| C(308)-P(6)-Pt(3)  | 119.2(18) |
| C(306)-P(6)-Pt(3)  | 118(2)    |
| C(40S)-P(6)-Pt(3)  | 112(2)    |
| C(29S)-P(7)-C(14S) | 99(3)     |
| C(29S)-P(7)-C(12S) | 111(3)    |
| C(14S)-P(7)-C(12S) | 108(3)    |
| C(29S)-P(7)-Pt(4)  | 124.3(19) |
| C(14S)-P(7)-Pt(4)  | 103(2)    |
| C(12S)-P(7)-Pt(4)  | 110.2(16) |
| C(46S)-P(8)-C(47S) | 93(5)     |
| C(46S)-P(8)-C(45S) | 86(4)     |
| C(47S)-P(8)-C(45S) | 109(3)    |
| C(46S)-P(8)-Pt(4)  | 129(2)    |
| C(47S)-P(8)-Pt(4)  | 121(2)    |
| C(45S)-P(8)-Pt(4)  | 113(3)    |
| C(41)-O(1)-Pt(1)   | 125(2)    |
| C(314)-O(3)-Pt(2)  | 115(2)    |
| C(57)-O(5)-Pt(3)   | 111(3)    |
| C(24)-N(5)-C(23)   | 123(2)    |
| C(24)-N(5)-Pt(1)   | 112.4(16) |
| C(23)-N(5)-Pt(1)   | 121.6(16) |
| C(26)-C(29)-C(30)  | 120       |
| C(26)-C(29)-H(29)  | 120       |
| C(30)-C(29)-H(29)  | 120       |
| C(27)-C(26)-C(29)  | 120       |
| C(27)-C(26)-C(10)  | 120(2)    |
| C(29)-C(26)-C(10)  | 120(2)    |
| C(26)-C(27)-C(28)  | 120       |



|                    |           |
|--------------------|-----------|
| C(26)-C(27)-H(27)  | 120       |
| C(28)-C(27)-H(27)  | 120       |
| N(6)-C(28)-C(27)   | 120       |
| N(6)-C(28)-H(28)   | 120       |
| C(27)-C(28)-H(28)  | 120       |
| C(30)-N(6)-C(28)   | 120       |
| C(30)-N(6)-Pt(2)   | 116.7(13) |
| C(28)-N(6)-Pt(2)   | 120.9(14) |
| N(6)-C(30)-C(29)   | 120       |
| N(6)-C(30)-H(500)  | 120       |
| C(29)-C(30)-H(500) | 120       |
| C(65)-P(1)-C(67)   | 104(2)    |
| C(65)-P(1)-C(313)  | 106(2)    |
| C(67)-P(1)-C(313)  | 100(2)    |
| C(65)-P(1)-Pt(1)   | 116.0(15) |
| C(67)-P(1)-Pt(1)   | 114.3(15) |
| C(313)-P(1)-Pt(1)  | 115.2(17) |
| C(36)-N(8)-C(40)   | 120       |
| C(36)-N(8)-Pt(4)   | 123.2(15) |
| C(40)-N(8)-Pt(4)   | 115.9(15) |
| N(8)-C(36)-C(37)   | 120       |
| N(8)-C(36)-H(36)   | 120       |
| C(37)-C(36)-H(36)  | 120       |
| C(36)-C(37)-C(38)  | 120       |
| C(36)-C(37)-H(37)  | 120       |
| C(38)-C(37)-H(37)  | 120       |
| C(39)-C(38)-C(37)  | 120       |
| C(39)-C(38)-C(200) | 119(2)    |
| C(37)-C(38)-C(200) | 121(2)    |
| C(38)-C(39)-C(40)  | 120       |
| C(38)-C(39)-H(39)  | 120       |
| C(40)-C(39)-H(39)  | 120       |
| C(39)-C(40)-N(8)   | 120       |
| C(39)-C(40)-H(40)  | 120       |
| N(8)-C(40)-H(40)   | 120       |
| C(35)-C(34)-C(31)  | 124(4)    |
| C(35)-C(34)-H(34)  | 118.2     |
| C(31)-C(34)-H(34)  | 118.2     |
| C(32)-C(31)-C(14)  | 126(4)    |
| C(32)-C(31)-C(34)  | 114(3)    |
| C(14)-C(31)-C(34)  | 120(3)    |
| C(31)-C(32)-C(33)  | 125(4)    |
| C(31)-C(32)-H(32)  | 117.7     |

|                   |           |
|-------------------|-----------|
| C(33)-C(32)-H(32) | 117.6     |
| N(7)-C(33)-C(32)  | 118(4)    |
| N(7)-C(33)-H(33)  | 120.9     |
| C(32)-C(33)-H(33) | 120.9     |
| C(35)-N(7)-C(33)  | 118(3)    |
| C(35)-N(7)-Pt(3)  | 122(3)    |
| C(33)-N(7)-Pt(3)  | 118(3)    |
| C(34)-C(35)-N(7)  | 121(4)    |
| C(34)-C(35)-H(35) | 119.5     |
| N(7)-C(35)-H(35)  | 119.5     |
| C(71)-P(2)-C(317) | 111(2)    |
| C(71)-P(2)-C(75)  | 102(3)    |
| C(317)-P(2)-C(75) | 106(3)    |
| C(71)-P(2)-Pt(1)  | 119.9(13) |
| C(317)-P(2)-Pt(1) | 110.7(15) |
| C(75)-P(2)-Pt(1)  | 106.4(14) |
| C(1)-N(1)-C(4')   | 108       |
| C(1)-N(1)-Zn(1)   | 128.7(11) |
| C(4')-N(1)-Zn(1)  | 123.3(11) |
| C(200)-C(1)-C(2)  | 129(2)    |
| C(200)-C(1)-N(1)  | 123(2)    |
| C(2)-C(1)-N(1)    | 108       |
| C(1)-C(2)-C(4)    | 108       |
| C(1)-C(2)-H(2)    | 126       |
| C(4)-C(2)-H(2)    | 126       |
| C(4')-C(4)-C(2)   | 108       |
| C(4')-C(4)-H(4)   | 126       |
| C(2)-C(4)-H(4)    | 126       |
| C(5)-C(4')-C(4)   | 121.7(19) |
| C(5)-C(4')-N(1)   | 130.2(19) |
| C(4)-C(4')-N(1)   | 108       |
| C(301)-P(3)-C(77) | 100(2)    |
| C(301)-P(3)-C(79) | 110(2)    |
| C(77)-P(3)-C(79)  | 98(3)     |
| C(301)-P(3)-Pt(2) | 129.0(18) |
| C(77)-P(3)-Pt(2)  | 108.0(15) |
| C(79)-P(3)-Pt(2)  | 107.6(13) |
| C(14)-C(13)-C(3)  | 129.4(19) |
| C(14)-C(13)-N(3)  | 122.5(19) |
| C(3)-C(13)-N(3)   | 108       |
| C(13)-C(3)-C(11)  | 108       |
| C(13)-C(3)-H(3)   | 126       |
| C(11)-C(3)-H(3)   | 126       |

|                   |           |
|-------------------|-----------|
| C(3)-C(11)-C(3')  | 108       |
| C(3)-C(11)-H(11)  | 126       |
| C(3')-C(11)-H(11) | 126       |
| C(10)-C(3')-N(3)  | 127.4(19) |
| C(10)-C(3')-C(11) | 124.5(19) |
| N(3)-C(3')-C(11)  | 108       |
| C(3')-N(3)-C(13)  | 108       |
| C(3')-N(3)-Zn(1)  | 122.2(10) |
| C(13)-N(3)-Zn(1)  | 128.7(10) |
| C(4')-C(5)-C(6)   | 124(2)    |
| C(4')-C(5)-C(21)  | 122(3)    |
| C(6)-C(5)-C(21)   | 114(2)    |
| C(9)-N(2)-C(6)    | 108       |
| C(9)-N(2)-Zn(1)   | 124.6(11) |
| C(6)-N(2)-Zn(1)   | 126.4(11) |
| C(5)-C(6)-C(7)    | 127.0(17) |
| C(5)-C(6)-N(2)    | 124.9(17) |
| C(7)-C(6)-N(2)    | 108       |
| C(6)-C(7)-C(8)    | 108       |
| C(6)-C(7)-H(7)    | 126       |
| C(8)-C(7)-H(7)    | 126       |
| C(7)-C(8)-C(9)    | 108       |
| C(7)-C(8)-H(8)    | 126       |
| C(9)-C(8)-H(8)    | 126       |
| C(10)-C(9)-N(2)   | 125.3(18) |
| C(10)-C(9)-C(8)   | 126.7(18) |
| N(2)-C(9)-C(8)    | 108       |
| C(3')-C(10)-C(9)  | 128(3)    |
| C(3')-C(10)-C(26) | 116(2)    |
| C(9)-C(10)-C(26)  | 116(2)    |
| C(13)-C(14)-C(16) | 131(2)    |
| C(13)-C(14)-C(31) | 118(3)    |
| C(16)-C(14)-C(31) | 111(2)    |
| C(19)-N(4)-C(16)  | 108       |
| C(19)-N(4)-Zn(1)  | 123.4(11) |
| C(16)-N(4)-Zn(1)  | 127.9(11) |
| C(17)-C(16)-N(4)  | 108       |
| C(17)-C(16)-C(14) | 129.9(16) |
| N(4)-C(16)-C(14)  | 122.1(16) |
| C(18)-C(17)-C(16) | 108       |
| C(18)-C(17)-H(17) | 126       |
| C(16)-C(17)-H(17) | 126       |
| C(19)-C(18)-C(17) | 108       |

|                    |           |
|--------------------|-----------|
| C(19)-C(18)-H(18)  | 126       |
| C(17)-C(18)-H(18)  | 126       |
| N(4)-C(19)-C(18)   | 108       |
| N(4)-C(19)-C(200)  | 126.6(18) |
| C(18)-C(19)-C(200) | 125.3(18) |
| C(25)-C(21)-C(22)  | 116(3)    |
| C(25)-C(21)-C(5)   | 122(3)    |
| C(22)-C(21)-C(5)   | 122(3)    |
| C(23)-C(22)-C(21)  | 123(3)    |
| C(23)-C(22)-H(22)  | 118.5     |
| C(21)-C(22)-H(22)  | 118.5     |
| N(5)-C(23)-C(22)   | 118(2)    |
| N(5)-C(23)-H(23)   | 121.2     |
| C(22)-C(23)-H(23)  | 121.2     |
| N(5)-C(24)-C(25)   | 120(2)    |
| N(5)-C(24)-H(24)   | 120.1     |
| C(25)-C(24)-H(24)  | 120.1     |
| C(21)-C(25)-C(24)  | 120(3)    |
| C(21)-C(25)-H(25)  | 120       |
| C(24)-C(25)-H(25)  | 119.9     |
| O(1)-C(41)-O(2)    | 117(3)    |
| O(1)-C(41)-C(42)   | 122(4)    |
| O(2)-C(41)-C(42)   | 121(4)    |
| C(47)-C(42)-C(41)  | 120(4)    |
| C(47)-C(42)-C(43)  | 120(3)    |
| C(41)-C(42)-C(43)  | 119(4)    |
| C(45)-C(43)-C(42)  | 120(3)    |
| C(45)-C(43)-H(43)  | 120.1     |
| C(42)-C(43)-H(43)  | 120.1     |
| C(45)-C(44)-C(52)  | 120       |
| C(45)-C(44)-C(46)  | 121(2)    |
| C(52)-C(44)-C(46)  | 118(2)    |
| C(48)-C(45)-C(44)  | 120       |
| C(48)-C(45)-C(43)  | 120(2)    |
| C(44)-C(45)-C(43)  | 120(2)    |
| C(49)-C(48)-C(45)  | 120       |
| C(49)-C(48)-H(48)  | 120       |
| C(45)-C(48)-H(48)  | 120       |
| C(48)-C(49)-C(51)  | 120       |
| C(48)-C(49)-H(49)  | 120       |
| C(51)-C(49)-H(49)  | 120       |
| C(49)-C(51)-C(52)  | 120       |
| C(49)-C(51)-C(314) | 112(3)    |

|                     |        |
|---------------------|--------|
| C(52)-C(51)-C(314)  | 128(3) |
| C(51)-C(52)-C(44)   | 120    |
| C(51)-C(52)-H(52)   | 120    |
| C(44)-C(52)-H(52)   | 120    |
| C(44)-C(46)-C(47)   | 118(3) |
| C(44)-C(46)-H(46)   | 120.9  |
| C(47)-C(46)-H(46)   | 120.8  |
| C(42)-C(47)-C(46)   | 120(4) |
| C(42)-C(47)-H(47)   | 120.1  |
| C(46)-C(47)-H(47)   | 120.2  |
| C(59)-C(55)-C(60)   | 119(5) |
| C(59)-C(55)-H(55)   | 120.4  |
| C(60)-C(55)-H(55)   | 120.4  |
| O(6)-C(57)-O(5)     | 136(6) |
| O(6)-C(57)-C(59)    | 121(6) |
| O(5)-C(57)-C(59)    | 101(5) |
| C(59)-C(58)-C(315)  | 122(5) |
| C(59)-C(58)-H(58)   | 119    |
| C(315)-C(58)-H(58)  | 119    |
| C(55)-C(59)-C(58)   | 123(5) |
| C(55)-C(59)-C(57)   | 111(5) |
| C(58)-C(59)-C(57)   | 127(5) |
| C(61)-C(60)-C(56')  | 120    |
| C(61)-C(60)-C(55)   | 122(3) |
| C(56')-C(60)-C(55)  | 118(3) |
| C(60)-C(61)-C(62)   | 120    |
| C(60)-C(61)-H(61)   | 120    |
| C(62)-C(61)-H(61)   | 120    |
| C(61)-C(62)-C(63)   | 120    |
| C(61)-C(62)-H(62)   | 120    |
| C(63)-C(62)-H(62)   | 120    |
| C(56)-C(63)-C(62)   | 120    |
| C(56)-C(63)-C(316)  | 123(3) |
| C(62)-C(63)-C(316)  | 117(3) |
| C(63)-C(56)-C(56')  | 120    |
| C(63)-C(56)-H(56)   | 120    |
| C(56')-C(56)-H(56)  | 120    |
| C(56)-C(56')-C(60)  | 120    |
| C(56)-C(56')-C(315) | 115(3) |
| C(60)-C(56')-C(315) | 125(3) |
| C(66)-C(65)-P(1)    | 116(3) |
| C(66)-C(65)-H(65A)  | 108.2  |
| P(1)-C(65)-H(65A)   | 108.2  |

|                     |        |
|---------------------|--------|
| C(66)-C(65)-H(65B)  | 108.1  |
| P(1)-C(65)-H(65B)   | 108.1  |
| H(65A)-C(65)-H(65B) | 107.3  |
| C(65)-C(66)-H(66A)  | 109.5  |
| C(65)-C(66)-H(66B)  | 109.5  |
| H(66A)-C(66)-H(66B) | 109.5  |
| C(65)-C(66)-H(66C)  | 109.4  |
| H(66A)-C(66)-H(66C) | 109.5  |
| H(66B)-C(66)-H(66C) | 109.5  |
| C(319)-C(67)-P(1)   | 137(4) |
| C(319)-C(67)-H(67A) | 103.1  |
| P(1)-C(67)-H(67A)   | 102.9  |
| C(319)-C(67)-H(67B) | 103    |
| P(1)-C(67)-H(67B)   | 103    |
| H(67A)-C(67)-H(67B) | 105.1  |
| C(72)-C(71)-P(2)    | 120(3) |
| C(72)-C(71)-H(71A)  | 107.2  |
| P(2)-C(71)-H(71A)   | 107.3  |
| C(72)-C(71)-H(71B)  | 107.3  |
| P(2)-C(71)-H(71B)   | 107.2  |
| H(71A)-C(71)-H(71B) | 106.9  |
| C(71)-C(72)-H(72A)  | 109.4  |
| C(71)-C(72)-H(72B)  | 109.6  |
| H(72A)-C(72)-H(72B) | 109.5  |
| C(71)-C(72)-H(72C)  | 109.4  |
| H(72A)-C(72)-H(72C) | 109.5  |
| H(72B)-C(72)-H(72C) | 109.5  |
| C(317)-C(73)-H(73A) | 109.5  |
| C(317)-C(73)-H(73B) | 109.4  |
| H(73A)-C(73)-H(73B) | 109.5  |
| C(317)-C(73)-H(73C) | 109.4  |
| H(73A)-C(73)-H(73C) | 109.5  |
| H(73B)-C(73)-H(73C) | 109.5  |
| C(76)-C(75)-P(2)    | 122(5) |
| C(76)-C(75)-H(75A)  | 106.6  |
| P(2)-C(75)-H(75A)   | 106.8  |
| C(76)-C(75)-H(75B)  | 106.8  |
| P(2)-C(75)-H(75B)   | 106.7  |
| H(75A)-C(75)-H(75B) | 106.6  |
| C(75)-C(76)-H(76A)  | 109.7  |
| C(75)-C(76)-H(76B)  | 109.6  |
| H(76A)-C(76)-H(76B) | 109.2  |
| C(75)-C(76)-H(76C)  | 109.8  |

|                      |        |
|----------------------|--------|
| H(76A)-C(76)-H(76C)  | 109.2  |
| H(76B)-C(76)-H(76C)  | 109.3  |
| C(78)-C(77)-P(3)     | 118(4) |
| C(78)-C(77)-H(77A)   | 107.7  |
| P(3)-C(77)-H(77A)    | 107.9  |
| C(78)-C(77)-H(77B)   | 107.9  |
| P(3)-C(77)-H(77B)    | 107.9  |
| H(77A)-C(77)-H(77B)  | 107.2  |
| C(77)-C(78)-H(78A)   | 109.4  |
| C(77)-C(78)-H(78B)   | 109.5  |
| H(78A)-C(78)-H(78B)  | 109.5  |
| C(77)-C(78)-H(78C)   | 109.5  |
| H(78A)-C(78)-H(78C)  | 109.5  |
| H(78B)-C(78)-H(78C)  | 109.5  |
| C(50S)-C(79)-P(3)    | 114(4) |
| C(50S)-C(79)-H(79A)  | 108.7  |
| P(3)-C(79)-H(79A)    | 108.7  |
| C(50S)-C(79)-H(79B)  | 108.8  |
| P(3)-C(79)-H(79B)    | 108.8  |
| H(79A)-C(79)-H(79B)  | 107.6  |
| C(1)-C(200)-C(19)    | 128(3) |
| C(1)-C(200)-C(38)    | 114(3) |
| C(19)-C(200)-C(38)   | 118(2) |
| C(303)-C(304)-H(501) | 109.5  |
| C(303)-C(304)-H(502) | 109.5  |
| H(501)-C(304)-H(502) | 109.5  |
| C(303)-C(304)-H(30C) | 109.4  |
| H(501)-C(304)-H(30C) | 109.5  |
| H(502)-C(304)-H(30C) | 109.5  |
| C(304)-C(303)-P(4)   | 106(3) |
| C(304)-C(303)-H(503) | 110.6  |
| P(4)-C(303)-H(503)   | 110.6  |
| C(304)-C(303)-H(504) | 110.5  |
| P(4)-C(303)-H(504)   | 110.6  |
| H(503)-C(303)-H(504) | 108.7  |
| C(306)-C(307)-H(30D) | 123    |
| C(306)-C(307)-H(30E) | 122.6  |
| H(30D)-C(307)-H(30E) | 93.4   |
| C(306)-C(307)-H(30F) | 122.6  |
| H(30D)-C(307)-H(30F) | 93.5   |
| H(30E)-C(307)-H(30F) | 93.6   |
| C(307)-C(306)-P(6)   | 101(5) |
| C(307)-C(306)-H(30G) | 111.7  |

|                      |        |
|----------------------|--------|
| P(6)-C(306)-H(30G)   | 111.5  |
| C(307)-C(306)-H(30H) | 111.5  |
| P(6)-C(306)-H(30H)   | 111.6  |
| H(30G)-C(306)-H(30H) | 109.4  |
| C(316)-O(305)-Pt(4)  | 125(3) |
| C(301)-C(302)-H(505) | 109.4  |
| C(301)-C(302)-H(506) | 109.4  |
| H(505)-C(302)-H(506) | 109.5  |
| C(301)-C(302)-H(30I) | 109.7  |
| H(505)-C(302)-H(30I) | 109.5  |
| H(506)-C(302)-H(30I) | 109.5  |
| C(302)-C(301)-P(3)   | 126(4) |
| C(302)-C(301)-H(30J) | 105.7  |
| P(3)-C(301)-H(30J)   | 105.9  |
| C(302)-C(301)-H(30K) | 106    |
| P(3)-C(301)-H(30K)   | 106    |
| H(30J)-C(301)-H(30K) | 106.2  |
| C(41S)-C(308)-P(6)   | 113(4) |
| C(41S)-C(308)-H(30L) | 109    |
| P(6)-C(308)-H(30L)   | 108.8  |
| C(41S)-C(308)-H(30M) | 108.8  |
| P(6)-C(308)-H(30M)   | 109    |
| H(30L)-C(308)-H(30M) | 107.7  |
| C(10S)-C(311)-P(5)   | 108(4) |
| C(10S)-C(311)-H(31A) | 110.2  |
| P(5)-C(311)-H(31A)   | 110.2  |
| C(10S)-C(311)-H(31B) | 110    |
| P(5)-C(311)-H(31B)   | 110.1  |
| H(31A)-C(311)-H(31B) | 108.5  |
| C(318)-C(313)-P(1)   | 114(3) |
| C(318)-C(313)-H(317) | 108.7  |
| P(1)-C(313)-H(317)   | 108.7  |
| C(318)-C(313)-H(318) | 108.7  |
| P(1)-C(313)-H(318)   | 108.8  |
| H(317)-C(313)-H(318) | 107.7  |
| O(4)-C(314)-O(3)     | 121(4) |
| O(4)-C(314)-C(51)    | 131(5) |
| O(3)-C(314)-C(51)    | 107(4) |
| C(56')-C(315)-C(58)  | 113(4) |
| C(56')-C(315)-H(400) | 123.6  |
| C(58)-C(315)-H(400)  | 123.6  |
| O(8)-C(316)-O(305)   | 112(4) |
| O(8)-C(316)-C(63)    | 123(4) |



|                      |        |
|----------------------|--------|
| O(305)-C(316)-C(63)  | 125(4) |
| C(73)-C(317)-P(2)    | 106(4) |
| C(73)-C(317)-H(315)  | 110.5  |
| P(2)-C(317)-H(315)   | 110.5  |
| C(73)-C(317)-H(316)  | 110.5  |
| P(2)-C(317)-H(316)   | 110.5  |
| H(315)-C(317)-H(316) | 108.7  |
| C(313)-C(318)-H(310) | 109.4  |
| C(313)-C(318)-H(311) | 109.6  |
| H(310)-C(318)-H(311) | 109.5  |
| C(313)-C(318)-H(312) | 109.4  |
| H(310)-C(318)-H(312) | 109.5  |
| H(311)-C(318)-H(312) | 109.5  |
| C(67)-C(319)-H(313)  | 109.5  |
| C(67)-C(319)-H(31E)  | 109.6  |
| H(313)-C(319)-H(31E) | 109.5  |
| C(67)-C(319)-H(31F)  | 109.4  |
| H(313)-C(319)-H(31F) | 109.5  |
| H(31E)-C(319)-H(31F) | 109.5  |
| C(43S)-C(4S)-P(5)    | 102(4) |
| C(43S)-C(4S)-H(4S1)  | 111.3  |
| P(5)-C(4S)-H(4S1)    | 111.2  |
| C(43S)-C(4S)-H(4S2)  | 111.5  |
| P(5)-C(4S)-H(4S2)    | 111.4  |
| H(4S1)-C(4S)-H(4S2)  | 109.2  |
| C(18S)-C(8S)-H(8S1)  | 114.2  |
| C(18S)-C(8S)-H(8S2)  | 113.7  |
| H(8S1)-C(8S)-H(8S2)  | 104.7  |
| C(18S)-C(8S)-H(8S3)  | 113.7  |
| H(8S1)-C(8S)-H(8S3)  | 104.7  |
| H(8S2)-C(8S)-H(8S3)  | 104.8  |
| C(311)-C(10S)-H(10A) | 110.7  |
| C(311)-C(10S)-H(10B) | 110.9  |
| H(10A)-C(10S)-H(10B) | 108.1  |
| C(311)-C(10S)-H(10C) | 111    |
| H(10A)-C(10S)-H(10C) | 108    |
| H(10B)-C(10S)-H(10C) | 108    |
| C(35S)-C(12S)-P(7)   | 114(4) |
| C(35S)-C(12S)-H(12A) | 108.3  |
| P(7)-C(12S)-H(12A)   | 108.7  |
| C(35S)-C(12S)-H(12B) | 109.5  |
| P(7)-C(12S)-H(12B)   | 108.7  |
| H(12A)-C(12S)-H(12B) | 107.7  |

|                      |        |
|----------------------|--------|
| C(36S)-C(14S)-P(7)   | 121(3) |
| C(36S)-C(14S)-H(14A) | 107.2  |
| P(7)-C(14S)-H(14A)   | 107    |
| C(36S)-C(14S)-H(14B) | 107    |
| P(7)-C(14S)-H(14B)   | 107.1  |
| H(14A)-C(14S)-H(14B) | 106.8  |
| C(8S)-C(18S)-P(5)    | 118(3) |
| C(8S)-C(18S)-H(18A)  | 107.6  |
| P(5)-C(18S)-H(18A)   | 107.5  |
| C(8S)-C(18S)-H(18B)  | 108    |
| P(5)-C(18S)-H(18B)   | 108    |
| H(18A)-C(18S)-H(18B) | 107.1  |
| C(40S)-C(19S)-H(19A) | 109.6  |
| C(40S)-C(19S)-H(19B) | 109.6  |
| H(19A)-C(19S)-H(19B) | 109.3  |
| C(40S)-C(19S)-H(19C) | 109.6  |
| H(19A)-C(19S)-H(19C) | 109.4  |
| H(19B)-C(19S)-H(19C) | 109.3  |
| C(37S)-C(20S)-P(4)   | 47(3)  |
| C(37S)-C(20S)-H(20A) | 109.5  |
| P(4)-C(20S)-H(20A)   | 67.8   |
| C(37S)-C(20S)-H(20B) | 109.5  |
| P(4)-C(20S)-H(20B)   | 145.3  |
| H(20A)-C(20S)-H(20B) | 109.5  |
| C(37S)-C(20S)-H(20C) | 109.4  |
| P(4)-C(20S)-H(20C)   | 103.5  |
| H(20A)-C(20S)-H(20C) | 109.5  |
| H(20B)-C(20S)-H(20C) | 109.5  |
| C(34S)-C(29S)-P(7)   | 111(4) |
| C(34S)-C(29S)-H(29A) | 109.1  |
| P(7)-C(29S)-H(29A)   | 109.6  |
| C(34S)-C(29S)-H(29B) | 109.5  |
| P(7)-C(29S)-H(29B)   | 109.5  |
| H(29A)-C(29S)-H(29B) | 108.1  |
| C(29S)-C(34S)-H(34A) | 113.4  |
| C(29S)-C(34S)-H(34B) | 113.7  |
| H(34A)-C(34S)-H(34B) | 105.3  |
| C(29S)-C(34S)-H(34C) | 112.9  |
| H(34A)-C(34S)-H(34C) | 105.4  |
| H(34B)-C(34S)-H(34C) | 105.5  |
| C(12S)-C(35S)-H(35A) | 110.1  |
| C(12S)-C(35S)-H(35B) | 109.7  |
| H(35A)-C(35S)-H(35B) | 109.4  |

|                      |        |
|----------------------|--------|
| C(12S)-C(35S)-H(35C) | 108.9  |
| H(35A)-C(35S)-H(35C) | 109.4  |
| H(35B)-C(35S)-H(35C) | 109.4  |
| C(14S)-C(36S)-H(36A) | 111.2  |
| C(14S)-C(36S)-H(36B) | 111.5  |
| H(36A)-C(36S)-H(36B) | 107.5  |
| C(14S)-C(36S)-H(36C) | 111.2  |
| H(36A)-C(36S)-H(36C) | 107.6  |
| H(36B)-C(36S)-H(36C) | 107.6  |
| C(20S)-C(37S)-P(4)   | 90(4)  |
| C(20S)-C(37S)-H(37A) | 113.6  |
| P(4)-C(37S)-H(37A)   | 113.6  |
| C(20S)-C(37S)-H(37B) | 113.5  |
| P(4)-C(37S)-H(37B)   | 113.6  |
| H(37A)-C(37S)-H(37B) | 110.9  |
| C(39S)-C(38S)-P(4)   | 126(4) |
| C(39S)-C(38S)-H(38A) | 105.8  |
| P(4)-C(38S)-H(38A)   | 105.9  |
| C(39S)-C(38S)-H(38B) | 105.8  |
| P(4)-C(38S)-H(38B)   | 105.9  |
| H(38A)-C(38S)-H(38B) | 106.2  |
| C(38S)-C(39S)-H(39A) | 109.5  |
| C(38S)-C(39S)-H(39B) | 109.5  |
| H(39A)-C(39S)-H(39B) | 109.5  |
| C(38S)-C(39S)-H(39C) | 109.4  |
| H(39A)-C(39S)-H(39C) | 109.5  |
| H(39B)-C(39S)-H(39C) | 109.5  |
| C(19S)-C(40S)-P(6)   | 122(3) |
| C(19S)-C(40S)-H(40A) | 106.8  |
| P(6)-C(40S)-H(40A)   | 106.8  |
| C(19S)-C(40S)-H(40B) | 106.9  |
| P(6)-C(40S)-H(40B)   | 106.9  |
| H(40A)-C(40S)-H(40B) | 106.7  |
| C(308)-C(41S)-H(41A) | 111.4  |
| C(308)-C(41S)-H(41B) | 111.2  |
| H(41A)-C(41S)-H(41B) | 107.6  |
| C(308)-C(41S)-H(41C) | 111.3  |
| H(41A)-C(41S)-H(41C) | 107.5  |
| H(41B)-C(41S)-H(41C) | 107.6  |
| C(4S)-C(43S)-H(43A)  | 119.6  |
| C(4S)-C(43S)-H(43B)  | 119.8  |
| H(43A)-C(43S)-H(43B) | 97.6   |
| C(4S)-C(43S)-H(43C)  | 119.4  |

|                      |        |
|----------------------|--------|
| H(43A)-C(43S)-H(43C) | 97.8   |
| H(43B)-C(43S)-H(43C) | 97.6   |
| C(47S)-C(44S)-H(44A) | 109.5  |
| C(47S)-C(44S)-H(44B) | 109.6  |
| H(44A)-C(44S)-H(44B) | 109.3  |
| C(47S)-C(44S)-H(44C) | 109.7  |
| H(44A)-C(44S)-H(44C) | 109.3  |
| H(44B)-C(44S)-H(44C) | 109.3  |
| C(49S)-C(45S)-P(8)   | 101(6) |
| C(49S)-C(45S)-H(45A) | 111.6  |
| P(8)-C(45S)-H(45A)   | 111.6  |
| C(49S)-C(45S)-H(45B) | 111.7  |
| P(8)-C(45S)-H(45B)   | 111.8  |
| H(45A)-C(45S)-H(45B) | 109.5  |
| C(48S)-C(46S)-P(8)   | 130(5) |
| C(48S)-C(46S)-H(46A) | 104.9  |
| P(8)-C(46S)-H(46A)   | 104.9  |
| C(48S)-C(46S)-H(46B) | 104.7  |
| P(8)-C(46S)-H(46B)   | 104.7  |
| H(46A)-C(46S)-H(46B) | 105.8  |
| C(44S)-C(47S)-P(8)   | 125(3) |
| C(44S)-C(47S)-H(47A) | 106    |
| P(8)-C(47S)-H(47A)   | 106.1  |
| C(44S)-C(47S)-H(47B) | 106.2  |
| P(8)-C(47S)-H(47B)   | 106.1  |
| H(47A)-C(47S)-H(47B) | 106.3  |
| C(46S)-C(48S)-H(48A) | 109.5  |
| C(46S)-C(48S)-H(48B) | 109.5  |
| H(48A)-C(48S)-H(48B) | 109.5  |
| C(46S)-C(48S)-H(48C) | 109.3  |
| H(48A)-C(48S)-H(48C) | 109.5  |
| H(48B)-C(48S)-H(48C) | 109.5  |
| C(45S)-C(49S)-H(49A) | 111.9  |
| C(45S)-C(49S)-H(49B) | 112.3  |
| H(49A)-C(49S)-H(49B) | 106.7  |
| C(45S)-C(49S)-H(49C) | 112    |
| H(49A)-C(49S)-H(49C) | 106.8  |
| H(49B)-C(49S)-H(49C) | 106.8  |
| C(79)-C(50S)-H(50A)  | 109.4  |
| C(79)-C(50S)-H(50B)  | 109.5  |
| H(50A)-C(50S)-H(50B) | 109.5  |
| C(79)-C(50S)-H(50C)  | 109.5  |
| H(50A)-C(50S)-H(50C) | 109.5  |

|                      |           |
|----------------------|-----------|
| H(50B)-C(50S)-H(50C) | 109.5     |
| O(503)-S(500)-O(501) | 118(2)    |
| O(503)-S(500)-O(502) | 116(2)    |
| O(501)-S(500)-O(502) | 115(2)    |
| O(503)-S(500)-C(500) | 98.9(18)  |
| O(501)-S(500)-C(500) | 102.6(19) |
| O(502)-S(500)-C(500) | 102.2(19) |
| F(501)-C(500)-F(502) | 115(2)    |
| F(501)-C(500)-F(503) | 117(2)    |
| F(502)-C(500)-F(503) | 117(2)    |
| F(501)-C(500)-S(500) | 102(2)    |
| F(502)-C(500)-S(500) | 99(2)     |
| F(503)-C(500)-S(500) | 102(2)    |
| O(504)-S(501)-O(506) | 117(2)    |
| O(504)-S(501)-O(505) | 117(2)    |
| O(506)-S(501)-O(505) | 117(2)    |
| O(504)-S(501)-C(501) | 101(2)    |
| O(506)-S(501)-C(501) | 99(2)     |
| O(505)-S(501)-C(501) | 98(2)     |
| F(506)-C(501)-F(504) | 119(2)    |
| F(506)-C(501)-F(505) | 117(2)    |
| F(504)-C(501)-F(505) | 116(2)    |
| F(506)-C(501)-S(501) | 100(2)    |
| F(504)-C(501)-S(501) | 100(2)    |
| F(505)-C(501)-S(501) | 99(2)     |
| O(508)-S(502)-O(507) | 118(2)    |
| O(508)-S(502)-O(509) | 116(2)    |
| O(507)-S(502)-O(509) | 117(2)    |
| O(508)-S(502)-C(502) | 100(2)    |
| O(507)-S(502)-C(502) | 99(2)     |
| O(509)-S(502)-C(502) | 99(2)     |
| F(507)-C(502)-F(508) | 118(2)    |
| F(507)-C(502)-F(509) | 117(2)    |
| F(508)-C(502)-F(509) | 117(2)    |
| F(507)-C(502)-S(502) | 100(2)    |
| F(508)-C(502)-S(502) | 100(2)    |
| F(509)-C(502)-S(502) | 99(2)     |
| O(510)-S(503)-O(512) | 117(2)    |
| O(510)-S(503)-O(511) | 117(2)    |
| O(512)-S(503)-O(511) | 116(2)    |
| O(510)-S(503)-C(503) | 101(2)    |
| O(512)-S(503)-C(503) | 100(2)    |
| O(511)-S(503)-C(503) | 100(2)    |

|                      |        |
|----------------------|--------|
| F(510)-C(503)-F(511) | 117(2) |
| F(510)-C(503)-F(512) | 116(2) |
| F(511)-C(503)-F(512) | 117(2) |
| F(510)-C(503)-S(503) | 101(2) |
| F(511)-C(503)-S(503) | 101(2) |
| F(512)-C(503)-S(503) | 100(2) |

**Table 9.** Atomic coordinates ( $\times 10^4$ ) and equivalent isotropic displacement parameters ( $\text{\AA}^2 \times 10^3$ ) for **BT2**.  $U(\text{eq})$  is defined as one third of the trace of the orthogonalized  $U^{ij}$  tensor.

|       | x       | y         | z        | U(eq)   |
|-------|---------|-----------|----------|---------|
| Pt(1) | 5816(1) | 3577(1)   | 4430(1)  | 28(1)   |
| Pt(2) | 6648(1) | 10841(1)  | 7624(1)  | 31(1)   |
| S(1)  | 5841(1) | 9864(3)   | 4772(2)  | 56(1)   |
| S(2)  | 6862(1) | 5026(3)   | 1953(3)  | 72(2)   |
| P(1)  | 5391(1) | 2790(2)   | 4385(2)  | 34(1)   |
| P(2)  | 6120(1) | 2824(2)   | 4013(2)  | 34(1)   |
| P(3)  | 6376(1) | 11249(2)  | 8280(2)  | 44(1)   |
| P(4)  | 6983(1) | 11847(3)  | 7697(2)  | 51(1)   |
| F(1)  | 5361(5) | 9151(11)  | 4997(14) | 198(12) |
| F(2)  | 5351(4) | 10414(11) | 5084(9)  | 143(8)  |
| F(3)  | 5690(7) | 9795(14)  | 5788(10) | 208(13) |
| F(4)  | 7043(4) | 4415(7)   | 2994(7)  | 124(7)  |
| F(5)  | 6475(4) | 4441(7)   | 2572(5)  | 94(4)   |
| F(6)  | 6715(3) | 5486(6)   | 2935(4)  | 79(4)   |
| O(1)  | 5589(2) | 4297(5)   | 4910(5)  | 37(2)   |
| O(2)  | 5375(3) | 5114(7)   | 4130(6)  | 62(4)   |
| O(3)  | 6341(3) | 9883(6)   | 7490(5)  | 40(2)   |
| O(4)  | 6775(3) | 9106(6)   | 8007(5)  | 49(3)   |
| O(5)  | 6032(4) | 10497(7)  | 5080(8)  | 106(7)  |
| O(6)  | 5652(4) | 9994(11)  | 4157(6)  | 110(7)  |
| O(7)  | 6012(3) | 9150(7)   | 4900(7)  | 77(4)   |
| O(8)  | 6882(4) | 4286(6)   | 1720(5)  | 76(5)   |
| O(9)  | 6565(3) | 5436(10)  | 1586(6)  | 82(5)   |
| O(10) | 7132(3) | 5512(7)   | 2125(6)  | 65(4)   |
| N(1)  | 7384(3) | 6487(5)   | 4577(5)  | 24(2)   |
| N(2)  | 7052(2) | 7543(6)   | 5213(4)  | 21(2)   |
| N(3)  | 6147(3) | 4493(7)   | 4539(5)  | 30(3)   |
| N(4)  | 6837(3) | 10267(6)  | 6993(5)  | 26(2)   |
| C(1)  | 7563(3) | 6036(7)   | 4309(6)  | 27(3)   |
| C(2)  | 7417(4) | 5304(8)   | 4162(7)  | 35(3)   |
| C(3)  | 7131(4) | 5312(8)   | 4311(7)  | 36(3)   |

|       |         |          |          |       |
|-------|---------|----------|----------|-------|
| C(4)  | 7108(3) | 6066(7)  | 4572(5)  | 23(3) |
| C(5)  | 6850(3) | 6281(7)  | 4797(6)  | 28(3) |
| C(6)  | 6824(3) | 6951(7)  | 5093(6)  | 23(3) |
| C(7)  | 6564(3) | 7184(8)  | 5345(7)  | 34(3) |
| C(8)  | 6646(3) | 7859(7)  | 5629(6)  | 31(3) |
| C(9)  | 6956(3) | 8109(7)  | 5545(6)  | 22(3) |
| C(10) | 7131(3) | 8765(7)  | 5781(6)  | 26(3) |
| C(11) | 6589(3) | 5705(8)  | 4721(6)  | 30(3) |
| C(12) | 6365(3) | 5563(8)  | 4146(6)  | 28(3) |
| C(13) | 6146(3) | 4972(8)  | 4068(6)  | 28(3) |
| C(14) | 6348(3) | 4656(8)  | 5104(6)  | 33(3) |
| C(15) | 6571(3) | 5236(8)  | 5203(6)  | 30(3) |
| C(16) | 7014(3) | 9274(7)  | 6190(6)  | 24(3) |
| C(17) | 6723(3) | 9692(7)  | 6005(6)  | 26(3) |
| C(18) | 6646(3) | 10159(7) | 6413(6)  | 31(3) |
| C(19) | 7112(3) | 9847(8)  | 7168(6)  | 32(3) |
| C(20) | 7210(3) | 9369(8)  | 6786(6)  | 28(3) |
| C(21) | 5508(4) | 4973(10) | 4671(9)  | 49(4) |
| C(22) | 5612(3) | 5615(8)  | 5126(7)  | 34(3) |
| C(23) | 5792(4) | 5456(9)  | 5739(8)  | 47(4) |
| C(24) | 5929(4) | 6049(9)  | 6139(8)  | 49(4) |
| C(25) | 5869(3) | 6809(9)  | 5948(7)  | 35(3) |
| C(26) | 5688(3) | 6960(9)  | 5357(7)  | 40(4) |
| C(27) | 5563(3) | 6372(9)  | 4939(7)  | 40(4) |
| C(28) | 6023(4) | 7410(8)  | 6385(6)  | 32(3) |
| C(29) | 6341(4) | 7337(8)  | 6797(7)  | 37(3) |
| C(30) | 6485(4) | 7922(8)  | 7199(6)  | 35(3) |
| C(31) | 6332(4) | 8582(8)  | 7182(6)  | 33(3) |
| C(32) | 6023(4) | 8681(9)  | 6778(8)  | 45(4) |
| C(33) | 5878(3) | 8106(10) | 6384(7)  | 43(4) |
| C(34) | 6502(4) | 9220(9)  | 7624(7)  | 40(4) |
| C(35) | 5362(4) | 1841(9)  | 4047(7)  | 40(4) |
| C(36) | 5026(4) | 1448(10) | 3953(8)  | 50(4) |
| C(37) | 5014(4) | 3298(10) | 3986(8)  | 51(4) |
| C(38) | 4996(4) | 3490(10) | 3309(7)  | 51(4) |
| C(39) | 5366(5) | 2634(13) | 5165(8)  | 73(7) |
| C(40) | 5674(5) | 2307(14) | 5593(7)  | 82(8) |
| C(41) | 6245(5) | 1952(10) | 4396(10) | 66(6) |
| C(42) | 6486(6) | 2055(13) | 5069(11) | 84(7) |
| C(43) | 5920(5) | 2589(11) | 3220(9)  | 60(5) |
| C(44) | 5831(6) | 3302(15) | 2801(8)  | 82(7) |
| C(45) | 6503(4) | 3289(9)  | 4024(7)  | 41(4) |
| C(46) | 6741(4) | 2814(14) | 3785(10) | 74(6) |

|       |         |           |          |        |
|-------|---------|-----------|----------|--------|
| C(47) | 6579(6) | 10927(15) | 9057(10) | 85(7)  |
| C(48) | 6635(5) | 10148(13) | 9194(9)  | 73(6)  |
| C(49) | 5974(5) | 10852(12) | 8066(9)  | 63(5)  |
| C(50) | 5800(4) | 11117(13) | 7443(10) | 72(6)  |
| C(51) | 6323(5) | 12242(9)  | 8417(9)  | 55(4)  |
| C(52) | 6076(6) | 12416(11) | 8782(10) | 75(6)  |
| C(53) | 7297(5) | 11688(13) | 7308(11) | 73(6)  |
| C(54) | 7561(7) | 12298(17) | 7401(15) | 116(9) |
| C(55) | 6783(5) | 12741(10) | 7373(10) | 70(6)  |
| C(56) | 6557(7) | 12667(14) | 6711(11) | 93(8)  |
| C(57) | 7220(5) | 12036(12) | 8473(10) | 78(6)  |
| C(58) | 7424(5) | 11348(11) | 8772(10) | 69(5)  |
| C(63) | 5566(5) | 9793(10)  | 5156(11) | 100(9) |
| C(64) | 6768(4) | 4825(9)   | 2641(9)  | 94(9)  |
| C(65) | 5000    | 1060(14)  | 2500     | 65(8)  |
| C(66) | 4699(7) | 589(13)   | 2383(10) | 92(8)  |
| O(67) | 5000    | 1730(9)   | 2500     | 80(7)  |

**Table 10.** Bond lengths [ $\text{\AA}$ ] and angles [ $^\circ$ ] for **BT2'**.

|            |           |
|------------|-----------|
| Pt(1)-O(1) | 2.088(9)  |
| Pt(1)-N(3) | 2.100(11) |
| Pt(1)-P(2) | 2.247(4)  |
| Pt(1)-P(1) | 2.249(4)  |
| Pt(2)-O(3) | 2.093(10) |
| Pt(2)-N(4) | 2.101(11) |
| Pt(2)-P(4) | 2.240(4)  |
| Pt(2)-P(3) | 2.263(4)  |
| S(1)-O(6)  | 1.411(11) |
| S(1)-O(5)  | 1.429(11) |
| S(1)-O(7)  | 1.433(10) |
| S(1)-C(63) | 1.66(3)   |
| S(2)-O(10) | 1.388(11) |
| S(2)-O(8)  | 1.415(10) |
| S(2)-O(9)  | 1.477(11) |
| S(2)-C(64) | 1.77(2)   |
| P(1)-C(37) | 1.821(18) |
| P(1)-C(35) | 1.823(15) |
| P(1)-C(39) | 1.835(17) |
| P(2)-C(41) | 1.762(17) |
| P(2)-C(43) | 1.803(18) |
| P(2)-C(45) | 1.812(16) |
| P(3)-C(49) | 1.775(19) |



|              |           |
|--------------|-----------|
| P(3)-C(51)   | 1.795(16) |
| P(3)-C(47)   | 1.82(2)   |
| P(4)-C(57)   | 1.79(2)   |
| P(4)-C(55)   | 1.83(2)   |
| P(4)-C(53)   | 1.83(2)   |
| F(1)-C(63)   | 1.403(15) |
| F(2)-C(63)   | 1.399(15) |
| F(3)-C(63)   | 1.381(16) |
| F(4)-C(64)   | 1.406(14) |
| F(5)-C(64)   | 1.383(14) |
| F(6)-C(64)   | 1.388(13) |
| O(1)-C(21)   | 1.31(2)   |
| O(2)-C(21)   | 1.22(2)   |
| O(3)-C(34)   | 1.336(18) |
| O(4)-C(34)   | 1.246(19) |
| N(1)-C(1)    | 1.363(16) |
| N(1)-C(4)    | 1.381(15) |
| N(1)-H(1)    | 0.88      |
| N(2)-C(9)    | 1.381(15) |
| N(2)-C(6)    | 1.392(16) |
| N(3)-C(14)   | 1.350(17) |
| N(3)-C(13)   | 1.362(17) |
| N(4)-C(19)   | 1.338(17) |
| N(4)-C(18)   | 1.345(17) |
| C(1)-C(2)    | 1.421(18) |
| C(1)-C(10)#1 | 1.421(17) |
| C(2)-C(3)    | 1.36(2)   |
| C(2)-H(2)    | 0.95      |
| C(3)-C(4)    | 1.464(18) |
| C(3)-H(3)    | 0.95      |
| C(4)-C(5)    | 1.394(18) |
| C(5)-C(6)    | 1.376(18) |
| C(5)-C(11)   | 1.474(17) |
| C(6)-C(7)    | 1.444(17) |
| C(7)-C(8)    | 1.346(19) |
| C(7)-H(7)    | 0.95      |
| C(8)-C(9)    | 1.454(18) |
| C(8)-H(8)    | 0.95      |
| C(9)-C(10)   | 1.387(18) |
| C(10)-C(16)  | 1.479(17) |
| C(11)-C(15)  | 1.392(19) |
| C(11)-C(12)  | 1.394(19) |
| C(12)-C(13)  | 1.368(18) |

|              |           |
|--------------|-----------|
| C(12)-H(12)  | 0.95      |
| C(13)-H(13)  | 0.95      |
| C(14)-C(15)  | 1.361(18) |
| C(14)-H(14)  | 0.95      |
| C(15)-H(15)  | 0.95      |
| C(16)-C(20)  | 1.379(17) |
| C(16)-C(17)  | 1.389(17) |
| C(17)-C(18)  | 1.352(18) |
| C(17)-H(17)  | 0.95      |
| C(18)-H(18)  | 0.95      |
| C(19)-C(20)  | 1.362(18) |
| C(19)-H(19)  | 0.95      |
| C(20)-H(20)  | 0.95      |
| C(21)-C(22)  | 1.50(2)   |
| C(22)-C(27)  | 1.39(2)   |
| C(22)-C(23)  | 1.41(2)   |
| C(23)-C(24)  | 1.39(2)   |
| C(23)-H(23)  | 0.95      |
| C(24)-C(25)  | 1.40(2)   |
| C(24)-H(24)  | 0.95      |
| C(25)-C(26)  | 1.36(2)   |
| C(25)-C(28)  | 1.465(19) |
| C(26)-C(27)  | 1.40(2)   |
| C(26)-H(26)  | 0.95      |
| C(27)-H(27)  | 0.95      |
| C(28)-C(33)  | 1.36(2)   |
| C(28)-C(29)  | 1.41(2)   |
| C(29)-C(30)  | 1.39(2)   |
| C(29)-H(29)  | 0.95      |
| C(30)-C(31)  | 1.32(2)   |
| C(30)-H(30)  | 0.95      |
| C(31)-C(32)  | 1.37(2)   |
| C(31)-C(34)  | 1.53(2)   |
| C(32)-C(33)  | 1.37(2)   |
| C(32)-H(32)  | 0.95      |
| C(33)-H(33)  | 0.95      |
| C(35)-C(36)  | 1.541(19) |
| C(35)-H(35A) | 0.99      |
| C(35)-H(35B) | 0.99      |
| C(36)-H(36A) | 0.98      |
| C(36)-H(36B) | 0.98      |
| C(36)-H(36C) | 0.98      |
| C(37)-C(38)  | 1.56(2)   |

|              |         |
|--------------|---------|
| C(37)-H(37A) | 0.99    |
| C(37)-H(37B) | 0.99    |
| C(38)-H(38A) | 0.98    |
| C(38)-H(38B) | 0.98    |
| C(38)-H(38C) | 0.98    |
| C(39)-C(40)  | 1.50(3) |
| C(39)-H(39A) | 0.99    |
| C(39)-H(39B) | 0.99    |
| C(40)-H(40A) | 0.98    |
| C(40)-H(40B) | 0.98    |
| C(40)-H(40C) | 0.98    |
| C(41)-C(42)  | 1.58(3) |
| C(41)-H(41A) | 0.99    |
| C(41)-H(41B) | 0.99    |
| C(42)-H(42A) | 0.98    |
| C(42)-H(42B) | 0.98    |
| C(42)-H(42C) | 0.98    |
| C(43)-C(44)  | 1.55(3) |
| C(43)-H(43A) | 0.99    |
| C(43)-H(43B) | 0.99    |
| C(44)-H(44A) | 0.98    |
| C(44)-H(44B) | 0.98    |
| C(44)-H(44C) | 0.98    |
| C(45)-C(46)  | 1.53(2) |
| C(45)-H(45A) | 0.99    |
| C(45)-H(45B) | 0.99    |
| C(46)-H(46A) | 0.98    |
| C(46)-H(46B) | 0.98    |
| C(46)-H(46C) | 0.98    |
| C(47)-C(48)  | 1.41(3) |
| C(47)-H(47A) | 0.99    |
| C(47)-H(47B) | 0.99    |
| C(48)-H(48A) | 0.98    |
| C(48)-H(48B) | 0.98    |
| C(48)-H(48C) | 0.98    |
| C(49)-C(50)  | 1.47(3) |
| C(49)-H(49A) | 0.99    |
| C(49)-H(49B) | 0.99    |
| C(50)-H(50A) | 0.98    |
| C(50)-H(50B) | 0.98    |
| C(50)-H(50C) | 0.98    |
| C(51)-C(52)  | 1.55(3) |
| C(51)-H(51A) | 0.99    |

|                 |            |
|-----------------|------------|
| C(51)-H(51B)    | 0.99       |
| C(52)-H(52A)    | 0.98       |
| C(52)-H(52B)    | 0.98       |
| C(52)-H(52C)    | 0.98       |
| C(53)-C(54)     | 1.52(3)    |
| C(53)-H(53A)    | 0.99       |
| C(53)-H(53B)    | 0.99       |
| C(54)-H(54A)    | 0.98       |
| C(54)-H(54B)    | 0.98       |
| C(54)-H(54C)    | 0.98       |
| C(55)-C(56)     | 1.53(3)    |
| C(55)-H(55A)    | 0.99       |
| C(55)-H(55B)    | 0.99       |
| C(56)-H(56A)    | 0.98       |
| C(56)-H(56B)    | 0.98       |
| C(56)-H(56C)    | 0.98       |
| C(57)-C(58)     | 1.52(3)    |
| C(57)-H(57A)    | 0.99       |
| C(57)-H(57B)    | 0.99       |
| C(58)-H(58A)    | 0.98       |
| C(58)-H(58B)    | 0.98       |
| C(58)-H(58C)    | 0.98       |
| C(65)-O(67)     | 1.17(3)    |
| C(65)-C(66)#2   | 1.48(3)    |
| C(65)-C(66)     | 1.48(3)    |
| C(66)-H(66A)    | 0.98       |
| C(66)-H(66B)    | 0.98       |
| C(66)-H(66C)    | 0.98       |
| O(1)-Pt(1)-N(3) | 82.7(4)    |
| O(1)-Pt(1)-P(2) | 172.6(3)   |
| N(3)-Pt(1)-P(2) | 92.9(3)    |
| O(1)-Pt(1)-P(1) | 84.5(3)    |
| N(3)-Pt(1)-P(1) | 166.9(3)   |
| P(2)-Pt(1)-P(1) | 100.16(14) |
| O(3)-Pt(2)-N(4) | 82.2(4)    |
| O(3)-Pt(2)-P(4) | 175.6(3)   |
| N(4)-Pt(2)-P(4) | 93.7(3)    |
| O(3)-Pt(2)-P(3) | 86.0(3)    |
| N(4)-Pt(2)-P(3) | 168.2(3)   |
| P(4)-Pt(2)-P(3) | 98.10(15)  |
| O(6)-S(1)-O(5)  | 115.9(11)  |
| O(6)-S(1)-O(7)  | 116.5(10)  |

|                  |           |
|------------------|-----------|
| O(5)-S(1)-O(7)   | 113.5(9)  |
| O(6)-S(1)-C(63)  | 104.8(11) |
| O(5)-S(1)-C(63)  | 100.5(11) |
| O(7)-S(1)-C(63)  | 102.7(9)  |
| O(10)-S(2)-O(8)  | 122.1(10) |
| O(10)-S(2)-O(9)  | 110.9(10) |
| O(8)-S(2)-O(9)   | 111.7(9)  |
| O(10)-S(2)-C(64) | 105.0(8)  |
| O(8)-S(2)-C(64)  | 101.9(8)  |
| O(9)-S(2)-C(64)  | 102.7(8)  |
| C(37)-P(1)-C(35) | 107.2(8)  |
| C(37)-P(1)-C(39) | 105.2(10) |
| C(35)-P(1)-C(39) | 105.0(9)  |
| C(37)-P(1)-Pt(1) | 107.3(6)  |
| C(35)-P(1)-Pt(1) | 122.0(5)  |
| C(39)-P(1)-Pt(1) | 109.0(6)  |
| C(41)-P(2)-C(43) | 106.3(10) |
| C(41)-P(2)-C(45) | 104.4(8)  |
| C(43)-P(2)-C(45) | 105.6(8)  |
| C(41)-P(2)-Pt(1) | 115.2(7)  |
| C(43)-P(2)-Pt(1) | 113.6(7)  |
| C(45)-P(2)-Pt(1) | 110.9(5)  |
| C(49)-P(3)-C(51) | 105.5(9)  |
| C(49)-P(3)-C(47) | 106.5(11) |
| C(51)-P(3)-C(47) | 100.3(11) |
| C(49)-P(3)-Pt(2) | 109.6(6)  |
| C(51)-P(3)-Pt(2) | 122.4(7)  |
| C(47)-P(3)-Pt(2) | 111.2(7)  |
| C(57)-P(4)-C(55) | 107.3(10) |
| C(57)-P(4)-C(53) | 103.4(10) |
| C(55)-P(4)-C(53) | 104.6(10) |
| C(57)-P(4)-Pt(2) | 112.1(8)  |
| C(55)-P(4)-Pt(2) | 115.8(7)  |
| C(53)-P(4)-Pt(2) | 112.5(7)  |
| C(21)-O(1)-Pt(1) | 115.7(10) |
| C(34)-O(3)-Pt(2) | 114.3(10) |
| C(1)-N(1)-C(4)   | 105.8(10) |
| C(1)-N(1)-H(1)   | 127.1     |
| C(4)-N(1)-H(1)   | 127.1     |
| C(9)-N(2)-C(6)   | 109.9(10) |
| C(14)-N(3)-C(13) | 118.4(11) |
| C(14)-N(3)-Pt(1) | 119.1(9)  |
| C(13)-N(3)-Pt(1) | 122.2(8)  |

|                    |           |
|--------------------|-----------|
| C(19)-N(4)-C(18)   | 115.7(11) |
| C(19)-N(4)-Pt(2)   | 122.5(8)  |
| C(18)-N(4)-Pt(2)   | 120.1(9)  |
| N(1)-C(1)-C(2)     | 111.5(11) |
| N(1)-C(1)-C(10)#1  | 125.6(11) |
| C(2)-C(1)-C(10)#1  | 122.8(12) |
| C(3)-C(2)-C(1)     | 107.0(12) |
| C(3)-C(2)-H(2)     | 126.5     |
| C(1)-C(2)-H(2)     | 126.5     |
| C(2)-C(3)-C(4)     | 106.5(12) |
| C(2)-C(3)-H(3)     | 126.7     |
| C(4)-C(3)-H(3)     | 126.7     |
| N(1)-C(4)-C(5)     | 127.6(11) |
| N(1)-C(4)-C(3)     | 109.0(11) |
| C(5)-C(4)-C(3)     | 123.3(11) |
| C(6)-C(5)-C(4)     | 127.0(11) |
| C(6)-C(5)-C(11)    | 118.2(12) |
| C(4)-C(5)-C(11)    | 114.8(11) |
| C(5)-C(6)-N(2)     | 125.3(11) |
| C(5)-C(6)-C(7)     | 128.4(12) |
| N(2)-C(6)-C(7)     | 106.3(11) |
| C(8)-C(7)-C(6)     | 108.8(11) |
| C(8)-C(7)-H(7)     | 125.6     |
| C(6)-C(7)-H(7)     | 125.6     |
| C(7)-C(8)-C(9)     | 108.3(11) |
| C(7)-C(8)-H(8)     | 125.8     |
| C(9)-C(8)-H(8)     | 125.8     |
| N(2)-C(9)-C(10)    | 126.6(11) |
| N(2)-C(9)-C(8)     | 106.5(11) |
| C(10)-C(9)-C(8)    | 126.8(11) |
| C(9)-C(10)-C(1)#1  | 123.7(11) |
| C(9)-C(10)-C(16)   | 120.2(11) |
| C(1)#1-C(10)-C(16) | 115.9(11) |
| C(15)-C(11)-C(12)  | 117.1(12) |
| C(15)-C(11)-C(5)   | 121.9(12) |
| C(12)-C(11)-C(5)   | 120.8(12) |
| C(13)-C(12)-C(11)  | 120.3(12) |
| C(13)-C(12)-H(12)  | 119.9     |
| C(11)-C(12)-H(12)  | 119.9     |
| N(3)-C(13)-C(12)   | 121.5(12) |
| N(3)-C(13)-H(13)   | 119.3     |
| C(12)-C(13)-H(13)  | 119.3     |
| N(3)-C(14)-C(15)   | 121.8(13) |

|                   |           |
|-------------------|-----------|
| N(3)-C(14)-H(14)  | 119.1     |
| C(15)-C(14)-H(14) | 119.1     |
| C(14)-C(15)-C(11) | 120.7(13) |
| C(14)-C(15)-H(15) | 119.7     |
| C(11)-C(15)-H(15) | 119.7     |
| C(20)-C(16)-C(17) | 117.3(12) |
| C(20)-C(16)-C(10) | 118.4(11) |
| C(17)-C(16)-C(10) | 124.2(11) |
| C(18)-C(17)-C(16) | 119.1(12) |
| C(18)-C(17)-H(17) | 120.4     |
| C(16)-C(17)-H(17) | 120.4     |
| N(4)-C(18)-C(17)  | 124.4(13) |
| N(4)-C(18)-H(18)  | 117.8     |
| C(17)-C(18)-H(18) | 117.8     |
| N(4)-C(19)-C(20)  | 123.7(12) |
| N(4)-C(19)-H(19)  | 118.1     |
| C(20)-C(19)-H(19) | 118.1     |
| C(19)-C(20)-C(16) | 119.6(12) |
| C(19)-C(20)-H(20) | 120.2     |
| C(16)-C(20)-H(20) | 120.2     |
| O(2)-C(21)-O(1)   | 126.2(15) |
| O(2)-C(21)-C(22)  | 119.9(17) |
| O(1)-C(21)-C(22)  | 113.8(15) |
| C(27)-C(22)-C(23) | 118.6(14) |
| C(27)-C(22)-C(21) | 121.1(15) |
| C(23)-C(22)-C(21) | 119.9(14) |
| C(24)-C(23)-C(22) | 120.1(15) |
| C(24)-C(23)-H(23) | 119.9     |
| C(22)-C(23)-H(23) | 119.9     |
| C(23)-C(24)-C(25) | 120.3(17) |
| C(23)-C(24)-H(24) | 119.9     |
| C(25)-C(24)-H(24) | 119.9     |
| C(26)-C(25)-C(24) | 119.3(15) |
| C(26)-C(25)-C(28) | 122.6(14) |
| C(24)-C(25)-C(28) | 118.0(14) |
| C(25)-C(26)-C(27) | 121.3(15) |
| C(25)-C(26)-H(26) | 119.4     |
| C(27)-C(26)-H(26) | 119.4     |
| C(22)-C(27)-C(26) | 120.3(14) |
| C(22)-C(27)-H(27) | 119.9     |
| C(26)-C(27)-H(27) | 119.9     |
| C(33)-C(28)-C(29) | 115.3(13) |
| C(33)-C(28)-C(25) | 122.2(14) |

|                     |           |
|---------------------|-----------|
| C(29)-C(28)-C(25)   | 122.4(12) |
| C(30)-C(29)-C(28)   | 121.2(13) |
| C(30)-C(29)-H(29)   | 119.4     |
| C(28)-C(29)-H(29)   | 119.4     |
| C(31)-C(30)-C(29)   | 120.8(15) |
| C(31)-C(30)-H(30)   | 119.6     |
| C(29)-C(30)-H(30)   | 119.6     |
| C(30)-C(31)-C(32)   | 119.6(14) |
| C(30)-C(31)-C(34)   | 119.3(14) |
| C(32)-C(31)-C(34)   | 121.2(13) |
| C(33)-C(32)-C(31)   | 120.2(14) |
| C(33)-C(32)-H(32)   | 119.9     |
| C(31)-C(32)-H(32)   | 119.9     |
| C(28)-C(33)-C(32)   | 122.8(14) |
| C(28)-C(33)-H(33)   | 118.6     |
| C(32)-C(33)-H(33)   | 118.6     |
| O(4)-C(34)-O(3)     | 127.3(14) |
| O(4)-C(34)-C(31)    | 120.1(13) |
| O(3)-C(34)-C(31)    | 112.1(14) |
| C(36)-C(35)-P(1)    | 114.2(11) |
| C(36)-C(35)-H(35A)  | 108.7     |
| P(1)-C(35)-H(35A)   | 108.7     |
| C(36)-C(35)-H(35B)  | 108.7     |
| P(1)-C(35)-H(35B)   | 108.7     |
| H(35A)-C(35)-H(35B) | 107.6     |
| C(35)-C(36)-H(36A)  | 109.5     |
| C(35)-C(36)-H(36B)  | 109.5     |
| H(36A)-C(36)-H(36B) | 109.5     |
| C(35)-C(36)-H(36C)  | 109.5     |
| H(36A)-C(36)-H(36C) | 109.5     |
| H(36B)-C(36)-H(36C) | 109.5     |
| C(38)-C(37)-P(1)    | 112.2(12) |
| C(38)-C(37)-H(37A)  | 109.2     |
| P(1)-C(37)-H(37A)   | 109.2     |
| C(38)-C(37)-H(37B)  | 109.2     |
| P(1)-C(37)-H(37B)   | 109.2     |
| H(37A)-C(37)-H(37B) | 107.9     |
| C(37)-C(38)-H(38A)  | 109.5     |
| C(37)-C(38)-H(38B)  | 109.5     |
| H(38A)-C(38)-H(38B) | 109.5     |
| C(37)-C(38)-H(38C)  | 109.5     |
| H(38A)-C(38)-H(38C) | 109.5     |
| H(38B)-C(38)-H(38C) | 109.5     |



|                     |           |
|---------------------|-----------|
| C(40)-C(39)-P(1)    | 113.5(14) |
| C(40)-C(39)-H(39A)  | 108.9     |
| P(1)-C(39)-H(39A)   | 108.9     |
| C(40)-C(39)-H(39B)  | 108.9     |
| P(1)-C(39)-H(39B)   | 108.9     |
| H(39A)-C(39)-H(39B) | 107.7     |
| C(39)-C(40)-H(40A)  | 109.5     |
| C(39)-C(40)-H(40B)  | 109.5     |
| H(40A)-C(40)-H(40B) | 109.5     |
| C(39)-C(40)-H(40C)  | 109.5     |
| H(40A)-C(40)-H(40C) | 109.5     |
| H(40B)-C(40)-H(40C) | 109.5     |
| C(42)-C(41)-P(2)    | 113.2(15) |
| C(42)-C(41)-H(41A)  | 108.9     |
| P(2)-C(41)-H(41A)   | 108.9     |
| C(42)-C(41)-H(41B)  | 108.9     |
| P(2)-C(41)-H(41B)   | 108.9     |
| H(41A)-C(41)-H(41B) | 107.8     |
| C(41)-C(42)-H(42A)  | 109.5     |
| C(41)-C(42)-H(42B)  | 109.5     |
| H(42A)-C(42)-H(42B) | 109.5     |
| C(41)-C(42)-H(42C)  | 109.5     |
| H(42A)-C(42)-H(42C) | 109.5     |
| H(42B)-C(42)-H(42C) | 109.5     |
| C(44)-C(43)-P(2)    | 113.0(13) |
| C(44)-C(43)-H(43A)  | 109       |
| P(2)-C(43)-H(43A)   | 109       |
| C(44)-C(43)-H(43B)  | 109       |
| P(2)-C(43)-H(43B)   | 109       |
| H(43A)-C(43)-H(43B) | 107.8     |
| C(43)-C(44)-H(44A)  | 109.5     |
| C(43)-C(44)-H(44B)  | 109.5     |
| H(44A)-C(44)-H(44B) | 109.5     |
| C(43)-C(44)-H(44C)  | 109.5     |
| H(44A)-C(44)-H(44C) | 109.5     |
| H(44B)-C(44)-H(44C) | 109.5     |
| C(46)-C(45)-P(2)    | 115.9(12) |
| C(46)-C(45)-H(45A)  | 108.3     |
| P(2)-C(45)-H(45A)   | 108.3     |
| C(46)-C(45)-H(45B)  | 108.3     |
| P(2)-C(45)-H(45B)   | 108.3     |
| H(45A)-C(45)-H(45B) | 107.4     |
| C(45)-C(46)-H(46A)  | 109.5     |

|                     |           |
|---------------------|-----------|
| C(45)-C(46)-H(46B)  | 109.5     |
| H(46A)-C(46)-H(46B) | 109.5     |
| C(45)-C(46)-H(46C)  | 109.5     |
| H(46A)-C(46)-H(46C) | 109.5     |
| H(46B)-C(46)-H(46C) | 109.5     |
| C(48)-C(47)-P(3)    | 121.2(19) |
| C(48)-C(47)-H(47A)  | 107       |
| P(3)-C(47)-H(47A)   | 107       |
| C(48)-C(47)-H(47B)  | 107       |
| P(3)-C(47)-H(47B)   | 107       |
| H(47A)-C(47)-H(47B) | 106.8     |
| C(47)-C(48)-H(48A)  | 109.5     |
| C(47)-C(48)-H(48B)  | 109.5     |
| H(48A)-C(48)-H(48B) | 109.5     |
| C(47)-C(48)-H(48C)  | 109.5     |
| H(48A)-C(48)-H(48C) | 109.5     |
| H(48B)-C(48)-H(48C) | 109.5     |
| C(50)-C(49)-P(3)    | 107.9(15) |
| C(50)-C(49)-H(49A)  | 110.1     |
| P(3)-C(49)-H(49A)   | 110.1     |
| C(50)-C(49)-H(49B)  | 110.1     |
| P(3)-C(49)-H(49B)   | 110.1     |
| H(49A)-C(49)-H(49B) | 108.4     |
| C(49)-C(50)-H(50A)  | 109.5     |
| C(49)-C(50)-H(50B)  | 109.5     |
| H(50A)-C(50)-H(50B) | 109.5     |
| C(49)-C(50)-H(50C)  | 109.5     |
| H(50A)-C(50)-H(50C) | 109.5     |
| H(50B)-C(50)-H(50C) | 109.5     |
| C(52)-C(51)-P(3)    | 115.1(14) |
| C(52)-C(51)-H(51A)  | 108.5     |
| P(3)-C(51)-H(51A)   | 108.5     |
| C(52)-C(51)-H(51B)  | 108.5     |
| P(3)-C(51)-H(51B)   | 108.5     |
| H(51A)-C(51)-H(51B) | 107.5     |
| C(51)-C(52)-H(52A)  | 109.5     |
| C(51)-C(52)-H(52B)  | 109.5     |
| H(52A)-C(52)-H(52B) | 109.5     |
| C(51)-C(52)-H(52C)  | 109.5     |
| H(52A)-C(52)-H(52C) | 109.5     |
| H(52B)-C(52)-H(52C) | 109.5     |
| C(54)-C(53)-P(4)    | 116.1(16) |
| C(54)-C(53)-H(53A)  | 108.3     |

|                     |           |
|---------------------|-----------|
| P(4)-C(53)-H(53A)   | 108.3     |
| C(54)-C(53)-H(53B)  | 108.3     |
| P(4)-C(53)-H(53B)   | 108.3     |
| H(53A)-C(53)-H(53B) | 107.4     |
| C(53)-C(54)-H(54A)  | 109.5     |
| C(53)-C(54)-H(54B)  | 109.5     |
| H(54A)-C(54)-H(54B) | 109.5     |
| C(53)-C(54)-H(54C)  | 109.5     |
| H(54A)-C(54)-H(54C) | 109.5     |
| H(54B)-C(54)-H(54C) | 109.5     |
| C(56)-C(55)-P(4)    | 113.8(15) |
| C(56)-C(55)-H(55A)  | 108.8     |
| P(4)-C(55)-H(55A)   | 108.8     |
| C(56)-C(55)-H(55B)  | 108.8     |
| P(4)-C(55)-H(55B)   | 108.8     |
| H(55A)-C(55)-H(55B) | 107.7     |
| C(55)-C(56)-H(56A)  | 109.5     |
| C(55)-C(56)-H(56B)  | 109.5     |
| H(56A)-C(56)-H(56B) | 109.5     |
| C(55)-C(56)-H(56C)  | 109.5     |
| H(56A)-C(56)-H(56C) | 109.5     |
| H(56B)-C(56)-H(56C) | 109.5     |
| C(58)-C(57)-P(4)    | 112.0(12) |
| C(58)-C(57)-H(57A)  | 109.2     |
| P(4)-C(57)-H(57A)   | 109.2     |
| C(58)-C(57)-H(57B)  | 109.2     |
| P(4)-C(57)-H(57B)   | 109.2     |
| H(57A)-C(57)-H(57B) | 107.9     |
| C(57)-C(58)-H(58A)  | 109.5     |
| C(57)-C(58)-H(58B)  | 109.5     |
| H(58A)-C(58)-H(58B) | 109.5     |
| C(57)-C(58)-H(58C)  | 109.5     |
| H(58A)-C(58)-H(58C) | 109.5     |
| H(58B)-C(58)-H(58C) | 109.5     |
| F(3)-C(63)-F(2)     | 98.8(19)  |
| F(3)-C(63)-F(1)     | 107(3)    |
| F(2)-C(63)-F(1)     | 105.1(19) |
| F(3)-C(63)-S(1)     | 116.3(17) |
| F(2)-C(63)-S(1)     | 114.6(16) |
| F(1)-C(63)-S(1)     | 113.8(16) |
| F(5)-C(64)-F(6)     | 101.1(13) |
| F(5)-C(64)-F(4)     | 112.6(16) |
| F(6)-C(64)-F(4)     | 112.1(15) |

|                     |           |
|---------------------|-----------|
| F(5)-C(64)-S(2)     | 115.5(12) |
| F(6)-C(64)-S(2)     | 112.0(12) |
| F(4)-C(64)-S(2)     | 103.9(12) |
| O(67)-C(65)-C(66)#2 | 124.0(14) |
| O(67)-C(65)-C(66)   | 124.0(14) |
| C(66)#2-C(65)-C(66) | 112(3)    |
| C(65)-C(66)-H(66A)  | 109.5     |
| C(65)-C(66)-H(66B)  | 109.5     |
| H(66A)-C(66)-H(66B) | 109.5     |
| C(65)-C(66)-H(66C)  | 109.5     |
| H(66A)-C(66)-H(66C) | 109.5     |
| H(66B)-C(66)-H(66C) | 109.5     |

Symmetry transformations used to generate equivalent atoms:

#1  $-x+3/2, -y+3/2, -z+1$  #2  $-x+1, y, -z+1/2$

**Table 11.** Atomic coordinates ( $\times 10^4$ ) and equivalent isotropic displacement parameters ( $\text{\AA}^2 \times 10^3$ ) for **BT3'**.  $U(\text{eq})$  is defined as one third of the trace of the orthogonalized  $U^{ij}$  tensor.

|       | x        | y        | z        | U(eq)   |
|-------|----------|----------|----------|---------|
| Pt(1) | 4111(1)  | 3450(1)  | 5479(1)  | 128(1)  |
| Pt(2) | 3825(1)  | 4802(1)  | 1183(1)  | 108(1)  |
| P(1)  | 3645(5)  | 4940(5)  | 319(8)   | 152(5)  |
| P(2)  | 4263(5)  | 5280(4)  | 1279(8)  | 140(5)  |
| P(3)  | 4548(4)  | 3879(4)  | 5824(7)  | 125(5)  |
| P(4)  | 4116(10) | 3020(9)  | 6198(13) | 311(18) |
| O(1)  | 4167(10) | 3740(9)  | 4713(16) | 140(10) |
| O(51) | 3881(10) | 4670(8)  | 1981(13) | 141(9)  |
| C(17) | 1964(8)  | 1988(8)  | 1729(11) | 94(10)  |
| C(8)  | 1732(8)  | 1645(9)  | 1756(13) | 117(11) |
| C(9)  | 1765(8)  | 1490(7)  | 2304(15) | 111(11) |
| C(10) | 2017(8)  | 1737(9)  | 2615(10) | 97(9)   |
| N(3)  | 2140(7)  | 2044(7)  | 2259(12) | 98(9)   |
| C(11) | 2113(11) | 1678(11) | 3180(20) | 88(9)   |
| C(12) | 2350(7)  | 1931(7)  | 3466(12) | 95(9)   |
| C(13) | 2435(8)  | 1882(7)  | 4042(12) | 99(9)   |
| C(14) | 2696(8)  | 2183(8)  | 4204(10) | 104(10) |
| C(15) | 2771(7)  | 2419(6)  | 3728(13) | 91(9)   |
| N(4)  | 2558(7)  | 2263(7)  | 3272(10) | 89(8)   |
| C(16) | 2979(11) | 2748(11) | 3670(20) | 87(9)   |
| C(18) | 3867(7)  | 2913(9)  | 4577(15) | 128(11) |
| C(19) | 3619(9)  | 2784(8)  | 4156(12) | 108(10) |
| C(20) | 3220(8)  | 2851(8)  | 4195(12) | 101(10) |

|        |          |          |          |         |
|--------|----------|----------|----------|---------|
| C(21)  | 3069(7)  | 3047(9)  | 4654(15) | 127(11) |
| C(22)  | 3317(10) | 3177(9)  | 5075(12) | 140(12) |
| N(2)   | 3716(10) | 3110(9)  | 5036(12) | 141(11) |
| C(23)  | 3610(40) | 3460(30) | 6730(50) | 420(40) |
| C(24)  | 4643(15) | 3925(17) | 6530(20) | 149(12) |
| C(25)  | 4925(18) | 4214(18) | 6700(30) | 180(20) |
| C(26)  | 4443(12) | 4363(13) | 5550(20) | 121(11) |
| C(27)  | 4059(16) | 4499(17) | 5910(30) | 170(19) |
| C(40)  | 4263(15) | 5484(17) | 1890(30) | 183(14) |
| C(41)  | 3900(20) | 5700(20) | 2140(30) | 240(30) |
| C(43)  | 3262(19) | 4591(18) | 40(30)   | 181(15) |
| C(45)  | 4090(20) | 4880(20) | -230(30) | 200(20) |
| C(46)  | 4956(19) | 5310(20) | 1920(40) | 290(30) |
| C(50)  | 4065(14) | 4382(13) | 2158(13) | 143(12) |
| C(56)  | 3938(11) | 4047(11) | 3889(10) | 143(11) |
| C(57)  | 4203(9)  | 3866(8)  | 3534(16) | 135(11) |
| C(58)  | 4221(8)  | 3972(9)  | 2975(15) | 134(11) |
| C(59)  | 3974(10) | 4260(10) | 2770(11) | 125(10) |
| C(60)  | 3709(8)  | 4441(7)  | 3124(16) | 124(11) |
| C(61)  | 3691(9)  | 4335(9)  | 3684(15) | 126(10) |
| C(62)  | 3900(15) | 3955(16) | 4520(14) | 154(13) |
| O(63)  | 3567(15) | 4032(15) | 4770(20) | 213(17) |
| O(65)  | 4248(15) | 4151(12) | 1837(19) | 211(17) |
| C(67)  | 3097(7)  | 4368(6)  | 1536(12) | 89(9)   |
| C(68)  | 2900(6)  | 4032(7)  | 1695(12) | 92(10)  |
| C(69)  | 3049(7)  | 3668(6)  | 1556(12) | 90(10)  |
| C(70)  | 3396(8)  | 3640(5)  | 1257(12) | 100(11) |
| C(71)  | 3593(6)  | 3977(7)  | 1099(11) | 102(11) |
| N(1)   | 3444(7)  | 4341(6)  | 1238(11) | 103(8)  |
| C(74)  | 4639(11) | 2850(20) | 6330(30) | 350(20) |
| C(73)  | 4250(20) | 4540(20) | -70(30)  | 230(30) |
| C(108) | 5218(19) | 3473(19) | 5190(30) | 220(30) |
| C(109) | 5034(14) | 3785(17) | 5550(30) | 159(13) |
| C(110) | 3030(20) | 4800(30) | -490(30) | 230(30) |
| C(112) | 3430(20) | 5397(17) | 120(30)  | 180(14) |
| C(113) | 3100(20) | 5470(20) | 590(30)  | 240(30) |
| C(114) | 4370(20) | 5666(17) | 650(20)  | 240(30) |
| C(115) | 4759(16) | 5018(18) | 1520(30) | 193(15) |
| C(116) | 4720(20) | 5910(18) | 860(30)  | 240(30) |
| C(117) | 3810(20) | 3080(30) | 6940(30) | 420(40) |
| C(118) | 3727(17) | 2629(17) | 6070(40) | 340(30) |
| C(119) | 3860(30) | 2220(16) | 6260(50) | 410(40) |
| C(120) | 4680(30) | 2700(40) | 6940(30) | 440(40) |

|       |          |          |          |         |
|-------|----------|----------|----------|---------|
| S(1S) | 4404(11) | 1684(9)  | 7280(20) | 390(20) |
| O(1S) | 4598(16) | 1360(14) | 7460(30) | 450(30) |
| O(2S) | 4021(16) | 1610(20) | 7170(30) | 450(30) |
| O(3S) | 4600(20) | 1894(18) | 6900(30) | 440(30) |
| C(1S) | 4375(14) | 1943(13) | 7830(20) | 420(30) |
| F(1S) | 4688(18) | 2050(20) | 8040(30) | 470(30) |
| F(2S) | 4180(20) | 2250(15) | 7780(30) | 450(30) |
| F(3S) | 4210(20) | 1783(19) | 8240(20) | 470(30) |
| S(2S) | 5941(11) | 5422(12) | 2096(16) | 359(19) |
| O(4S) | 6030(15) | 5130(14) | 1730(20) | 290(20) |
| O(5S) | 5640(20) | 5340(20) | 2440(30) | 410(30) |
| O(6S) | 6260(19) | 5560(20) | 2370(30) | 430(30) |
| C(2S) | 5798(13) | 5783(14) | 1734(19) | 370(20) |
| F(4S) | 5518(18) | 5730(18) | 1410(30) | 400(20) |
| F(5S) | 5680(20) | 6075(14) | 2000(30) | 410(20) |
| F(6S) | 6040(19) | 5947(16) | 1420(30) | 380(20) |

**Table 12.** Bond lengths [ $\text{\AA}$ ] and angles [ $^\circ$ ] for **BT3'**.

|               |           |
|---------------|-----------|
| Pt(1)-N(2)    | 2.08(2)   |
| Pt(1)-O(1)    | 2.10(4)   |
| Pt(1)-P(3)    | 2.255(13) |
| Pt(1)-P(4)    | 2.27(2)   |
| Pt(2)-O(51)   | 1.97(3)   |
| Pt(2)-N(1)    | 2.057(19) |
| Pt(2)-P(1)    | 2.210(19) |
| Pt(2)-P(2)    | 2.236(13) |
| P(1)-C(112)   | 1.80(6)   |
| P(1)-C(43)    | 1.89(6)   |
| P(1)-C(45)    | 2.02(7)   |
| P(2)-C(40)    | 1.61(6)   |
| P(2)-C(115)   | 2.00(6)   |
| P(2)-C(114)   | 2.04(2)   |
| P(3)-C(24)    | 1.72(6)   |
| P(3)-C(109)   | 1.82(5)   |
| P(3)-C(26)    | 1.81(5)   |
| P(4)-C(74)    | 1.91(2)   |
| P(4)-C(118)   | 1.91(2)   |
| P(4)-C(117)   | 2.07(2)   |
| O(1)-C(62)    | 1.26(2)   |
| O(51)-C(50)   | 1.25(2)   |
| C(17)-C(16)#1 | 1.33(4)   |
| C(17)-C(8)    | 1.42      |

|               |         |
|---------------|---------|
| C(17)-N(3)    | 1.42    |
| C(8)-C(9)     | 1.42    |
| C(8)-H(8)     | 0.95    |
| C(9)-C(10)    | 1.42    |
| C(9)-H(9)     | 0.95    |
| C(10)-N(3)    | 1.42    |
| C(10)-C(11)   | 1.42(5) |
| C(11)-C(12)   | 1.36(4) |
| C(11)-C(69)#1 | 1.45(4) |
| C(12)-C(13)   | 1.42    |
| C(12)-N(4)    | 1.42    |
| C(13)-C(14)   | 1.42    |
| C(13)-H(13)   | 0.95    |
| C(14)-C(15)   | 1.42    |
| C(14)-H(14)   | 0.95    |
| C(15)-C(16)   | 1.34(4) |
| C(15)-N(4)    | 1.42    |
| N(4)-H(4)     | 0.88    |
| C(16)-C(20)   | 1.55(5) |
| C(18)-C(19)   | 1.39    |
| C(18)-N(2)    | 1.39    |
| C(18)-H(18)   | 0.95    |
| C(19)-C(20)   | 1.39    |
| C(19)-H(19)   | 0.95    |
| C(20)-C(21)   | 1.39    |
| C(21)-C(22)   | 1.39    |
| C(21)-H(21)   | 0.95    |
| C(22)-N(2)    | 1.39    |
| C(22)-H(22)   | 0.95    |
| C(23)-C(117)  | 1.54(2) |
| C(23)-H(23A)  | 0.9972  |
| C(23)-H(23B)  | 0.9995  |
| C(23)-H(23C)  | 0.9981  |
| C(24)-C(25)   | 1.45(6) |
| C(24)-H(24A)  | 0.99    |
| C(24)-H(24B)  | 0.99    |
| C(25)-H(25A)  | 0.98    |
| C(25)-H(25B)  | 0.98    |
| C(25)-H(25C)  | 0.98    |
| C(26)-C(27)   | 1.63(7) |
| C(26)-H(26A)  | 0.99    |
| C(26)-H(26B)  | 0.99    |
| C(27)-H(27A)  | 1.0126  |

|              |         |
|--------------|---------|
| C(27)-H(27B) | 1.014   |
| C(27)-H(27C) | 1.0134  |
| C(40)-C(41)  | 1.56(2) |
| C(40)-H(40A) | 0.99    |
| C(40)-H(40B) | 0.99    |
| C(41)-H(41A) | 0.9939  |
| C(41)-H(41B) | 0.9946  |
| C(41)-H(41C) | 0.994   |
| C(43)-C(110) | 1.67(9) |
| C(43)-H(43A) | 0.99    |
| C(43)-H(43B) | 0.99    |
| C(45)-C(73)  | 1.34(8) |
| C(45)-H(45A) | 0.99    |
| C(45)-H(45B) | 0.99    |
| C(46)-C(115) | 1.55(2) |
| C(46)-H(46A) | 0.9838  |
| C(46)-H(46B) | 0.9838  |
| C(46)-H(46C) | 0.9839  |
| C(50)-O(65)  | 1.27(2) |
| C(50)-C(59)  | 1.56(2) |
| C(56)-C(57)  | 1.39    |
| C(56)-C(61)  | 1.39    |
| C(56)-C(62)  | 1.55(2) |
| C(57)-C(58)  | 1.39    |
| C(57)-H(57)  | 0.95    |
| C(58)-C(59)  | 1.39    |
| C(58)-H(58)  | 0.95    |
| C(59)-C(60)  | 1.39    |
| C(60)-C(61)  | 1.39    |
| C(60)-H(60)  | 0.95    |
| C(61)-H(61)  | 0.95    |
| C(62)-O(63)  | 1.32(6) |
| C(67)-C(68)  | 1.39    |
| C(67)-N(1)   | 1.39    |
| C(67)-H(67)  | 0.95    |
| C(68)-C(69)  | 1.39    |
| C(68)-H(68)  | 0.95    |
| C(69)-C(70)  | 1.39    |
| C(70)-C(71)  | 1.39    |
| C(70)-H(70)  | 0.95    |
| C(71)-N(1)   | 1.39    |
| C(71)-H(71)  | 0.95    |
| C(74)-C(120) | 1.55(2) |



|               |         |
|---------------|---------|
| C(74)-H(74A)  | 0.99    |
| C(74)-H(74B)  | 0.99    |
| C(73)-H(73A)  | 0.95    |
| C(73)-H(73B)  | 0.95    |
| C(108)-C(109) | 1.52(2) |
| C(108)-H(10A) | 0.9872  |
| C(108)-H(10B) | 0.9868  |
| C(108)-H(10C) | 0.9866  |
| C(109)-H(10D) | 0.99    |
| C(109)-H(10E) | 0.99    |
| C(110)-H(11A) | 1.0093  |
| C(110)-H(11B) | 1.0096  |
| C(110)-H(11C) | 1.0102  |
| C(112)-C(113) | 1.61(9) |
| C(112)-H(11D) | 0.99    |
| C(112)-H(11E) | 0.99    |
| C(113)-H(11F) | 1.0391  |
| C(113)-H(11G) | 1.0376  |
| C(113)-H(11H) | 1.036   |
| C(114)-C(116) | 1.55(2) |
| C(114)-H(11I) | 0.99    |
| C(114)-H(11J) | 0.99    |
| C(115)-H(11K) | 0.99    |
| C(115)-H(11L) | 0.99    |
| C(116)-H(11M) | 0.9903  |
| C(116)-H(11N) | 0.9903  |
| C(116)-H(11O) | 0.99    |
| C(117)-H(11P) | 0.99    |
| C(117)-H(11Q) | 0.99    |
| C(118)-C(119) | 1.55(2) |
| C(118)-H(11R) | 0.99    |
| C(118)-H(11S) | 0.99    |
| C(119)-H(11T) | 0.9946  |
| C(119)-H(11U) | 0.9952  |
| C(119)-H(11V) | 0.9948  |
| C(120)-H(12A) | 1.113   |
| C(120)-H(12B) | 1.1285  |
| C(120)-H(12C) | 1.1366  |
| S(1S)-O(3S)   | 1.34(4) |
| S(1S)-O(2S)   | 1.36(3) |
| S(1S)-O(1S)   | 1.37(3) |
| S(1S)-C(1S)   | 1.59(2) |
| C(1S)-F(1S)   | 1.24(3) |

|                    |           |
|--------------------|-----------|
| C(1S)-F(2S)        | 1.25(3)   |
| C(1S)-F(3S)        | 1.25(3)   |
| S(2S)-O(4S)        | 1.36(3)   |
| S(2S)-O(5S)        | 1.36(3)   |
| S(2S)-O(6S)        | 1.37(4)   |
| S(2S)-C(2S)        | 1.59(3)   |
| C(2S)-F(4S)        | 1.25(3)   |
| C(2S)-F(6S)        | 1.25(3)   |
| C(2S)-F(5S)        | 1.26(3)   |
|                    |           |
| N(2)-Pt(1)-O(1)    | 83.1(11)  |
| N(2)-Pt(1)-P(3)    | 170.2(9)  |
| O(1)-Pt(1)-P(3)    | 87.1(9)   |
| N(2)-Pt(1)-P(4)    | 91.5(10)  |
| O(1)-Pt(1)-P(4)    | 166.6(16) |
| P(3)-Pt(1)-P(4)    | 98.2(7)   |
| O(51)-Pt(2)-N(1)   | 79.8(11)  |
| O(51)-Pt(2)-P(1)   | 169.2(11) |
| N(1)-Pt(2)-P(1)    | 92.7(9)   |
| O(51)-Pt(2)-P(2)   | 90.1(10)  |
| N(1)-Pt(2)-P(2)    | 169.9(9)  |
| P(1)-Pt(2)-P(2)    | 97.4(6)   |
| C(112)-P(1)-C(43)  | 100(3)    |
| C(112)-P(1)-C(45)  | 102(3)    |
| C(43)-P(1)-C(45)   | 103(3)    |
| C(112)-P(1)-Pt(2)  | 124(3)    |
| C(43)-P(1)-Pt(2)   | 113(2)    |
| C(45)-P(1)-Pt(2)   | 112(2)    |
| C(40)-P(2)-C(115)  | 87(3)     |
| C(40)-P(2)-C(114)  | 113(3)    |
| C(115)-P(2)-C(114) | 111(3)    |
| C(40)-P(2)-Pt(2)   | 114(2)    |
| C(115)-P(2)-Pt(2)  | 105.6(17) |
| C(114)-P(2)-Pt(2)  | 121.1(16) |
| C(24)-P(3)-C(109)  | 101(3)    |
| C(24)-P(3)-C(26)   | 107(3)    |
| C(109)-P(3)-C(26)  | 103(3)    |
| C(24)-P(3)-Pt(1)   | 123.0(19) |
| C(109)-P(3)-Pt(1)  | 111.2(19) |
| C(26)-P(3)-Pt(1)   | 109.6(14) |
| C(74)-P(4)-C(118)  | 118.1(18) |
| C(74)-P(4)-C(117)  | 111.0(15) |
| C(118)-P(4)-C(117) | 82(4)     |

|                     |        |
|---------------------|--------|
| C(74)-P(4)-Pt(1)    | 109(2) |
| C(118)-P(4)-Pt(1)   | 109(2) |
| C(117)-P(4)-Pt(1)   | 126(3) |
| C(62)-O(1)-Pt(1)    | 122(3) |
| C(50)-O(51)-Pt(2)   | 124(2) |
| C(16)#1-C(17)-C(8)  | 133(3) |
| C(16)#1-C(17)-N(3)  | 119(3) |
| C(8)-C(17)-N(3)     | 108    |
| C(17)-C(8)-C(9)     | 108    |
| C(17)-C(8)-H(8)     | 126    |
| C(9)-C(8)-H(8)      | 126    |
| C(10)-C(9)-C(8)     | 108    |
| C(10)-C(9)-H(9)     | 126    |
| C(8)-C(9)-H(9)      | 126    |
| N(3)-C(10)-C(9)     | 108    |
| N(3)-C(10)-C(11)    | 128(3) |
| C(9)-C(10)-C(11)    | 124(3) |
| C(10)-N(3)-C(17)    | 108    |
| C(12)-C(11)-C(10)   | 121(3) |
| C(12)-C(11)-C(69)#1 | 123(9) |
| C(10)-C(11)-C(69)#1 | 116(8) |
| C(11)-C(12)-C(13)   | 122(3) |
| C(11)-C(12)-N(4)    | 130(3) |
| C(13)-C(12)-N(4)    | 108    |
| C(14)-C(13)-C(12)   | 108    |
| C(14)-C(13)-H(13)   | 126    |
| C(12)-C(13)-H(13)   | 126    |
| C(13)-C(14)-C(15)   | 108    |
| C(13)-C(14)-H(14)   | 126    |
| C(15)-C(14)-H(14)   | 126    |
| C(16)-C(15)-N(4)    | 121(3) |
| C(16)-C(15)-C(14)   | 131(3) |
| N(4)-C(15)-C(14)    | 108    |
| C(15)-N(4)-C(12)    | 108    |
| C(15)-N(4)-H(4)     | 126    |
| C(12)-N(4)-H(4)     | 126    |
| C(17)#1-C(16)-C(15) | 137(4) |
| C(17)#1-C(16)-C(20) | 110(3) |
| C(15)-C(16)-C(20)   | 113(3) |
| C(19)-C(18)-N(2)    | 120    |
| C(19)-C(18)-H(18)   | 120    |
| N(2)-C(18)-H(18)    | 120    |
| C(20)-C(19)-C(18)   | 120    |

|                     |        |
|---------------------|--------|
| C(20)-C(19)-H(19)   | 120    |
| C(18)-C(19)-H(19)   | 120    |
| C(21)-C(20)-C(19)   | 120    |
| C(21)-C(20)-C(16)   | 124(3) |
| C(19)-C(20)-C(16)   | 116(3) |
| C(22)-C(21)-C(20)   | 120    |
| C(22)-C(21)-H(21)   | 120    |
| C(20)-C(21)-H(21)   | 120    |
| C(21)-C(22)-N(2)    | 120    |
| C(21)-C(22)-H(22)   | 120    |
| N(2)-C(22)-H(22)    | 120    |
| C(22)-N(2)-C(18)    | 120    |
| C(22)-N(2)-Pt(1)    | 121(2) |
| C(18)-N(2)-Pt(1)    | 116(2) |
| C(117)-C(23)-H(23A) | 110.6  |
| C(117)-C(23)-H(23B) | 111.9  |
| H(23A)-C(23)-H(23B) | 107.8  |
| C(117)-C(23)-H(23C) | 111.2  |
| H(23A)-C(23)-H(23C) | 107.6  |
| H(23B)-C(23)-H(23C) | 107.5  |
| C(25)-C(24)-P(3)    | 118(4) |
| C(25)-C(24)-H(24A)  | 107.8  |
| P(3)-C(24)-H(24A)   | 107.8  |
| C(25)-C(24)-H(24B)  | 107.6  |
| P(3)-C(24)-H(24B)   | 107.7  |
| H(24A)-C(24)-H(24B) | 107.1  |
| C(24)-C(25)-H(25A)  | 109.6  |
| C(24)-C(25)-H(25B)  | 109.4  |
| H(25A)-C(25)-H(25B) | 109.5  |
| C(24)-C(25)-H(25C)  | 109.4  |
| H(25A)-C(25)-H(25C) | 109.5  |
| H(25B)-C(25)-H(25C) | 109.5  |
| C(27)-C(26)-P(3)    | 104(4) |
| C(27)-C(26)-H(26A)  | 110.9  |
| P(3)-C(26)-H(26A)   | 111.1  |
| C(27)-C(26)-H(26B)  | 111    |
| P(3)-C(26)-H(26B)   | 111.1  |
| H(26A)-C(26)-H(26B) | 109.1  |
| C(26)-C(27)-H(27A)  | 112.3  |
| C(26)-C(27)-H(27B)  | 112.7  |
| H(27A)-C(27)-H(27B) | 106.4  |
| C(26)-C(27)-H(27C)  | 112.5  |
| H(27A)-C(27)-H(27C) | 106.3  |

|                     |        |
|---------------------|--------|
| H(27B)-C(27)-H(27C) | 106.2  |
| C(41)-C(40)-P(2)    | 123(4) |
| C(41)-C(40)-H(40A)  | 106.4  |
| P(2)-C(40)-H(40A)   | 106.4  |
| C(41)-C(40)-H(40B)  | 106.6  |
| P(2)-C(40)-H(40B)   | 106.7  |
| H(40A)-C(40)-H(40B) | 106.6  |
| C(40)-C(41)-H(41A)  | 110.6  |
| C(40)-C(41)-H(41B)  | 111.1  |
| H(41A)-C(41)-H(41B) | 108    |
| C(40)-C(41)-H(41C)  | 110.7  |
| H(41A)-C(41)-H(41C) | 108.1  |
| H(41B)-C(41)-H(41C) | 108.1  |
| C(110)-C(43)-P(1)   | 109(4) |
| C(110)-C(43)-H(43A) | 110    |
| P(1)-C(43)-H(43A)   | 109.9  |
| C(110)-C(43)-H(43B) | 109.9  |
| P(1)-C(43)-H(43B)   | 109.7  |
| H(43A)-C(43)-H(43B) | 108.3  |
| C(73)-C(45)-P(1)    | 102(5) |
| C(73)-C(45)-H(45A)  | 111.3  |
| P(1)-C(45)-H(45A)   | 111.4  |
| C(73)-C(45)-H(45B)  | 111.4  |
| P(1)-C(45)-H(45B)   | 111.4  |
| H(45A)-C(45)-H(45B) | 109.3  |
| C(115)-C(46)-H(46A) | 109.6  |
| C(115)-C(46)-H(46B) | 109.9  |
| H(46A)-C(46)-H(46B) | 109.1  |
| C(115)-C(46)-H(46C) | 110    |
| H(46A)-C(46)-H(46C) | 109.1  |
| H(46B)-C(46)-H(46C) | 109.1  |
| O(51)-C(50)-O(65)   | 123(3) |
| O(51)-C(50)-C(59)   | 116(3) |
| O(65)-C(50)-C(59)   | 120(4) |
| C(57)-C(56)-C(61)   | 120    |
| C(57)-C(56)-C(62)   | 124(3) |
| C(61)-C(56)-C(62)   | 116(3) |
| C(58)-C(57)-C(56)   | 120    |
| C(58)-C(57)-H(57)   | 120    |
| C(56)-C(57)-H(57)   | 120    |
| C(59)-C(58)-C(57)   | 120    |
| C(59)-C(58)-H(58)   | 120    |
| C(57)-C(58)-H(58)   | 120    |

|                      |           |
|----------------------|-----------|
| C(58)-C(59)-C(60)    | 120       |
| C(58)-C(59)-C(50)    | 114(3)    |
| C(60)-C(59)-C(50)    | 126(3)    |
| C(61)-C(60)-C(59)    | 120       |
| C(61)-C(60)-H(60)    | 120       |
| C(59)-C(60)-H(60)    | 120       |
| C(60)-C(61)-C(56)    | 120       |
| C(60)-C(61)-H(61)    | 120       |
| C(56)-C(61)-H(61)    | 120       |
| O(1)-C(62)-O(63)     | 125(4)    |
| O(1)-C(62)-C(56)     | 115(4)    |
| O(63)-C(62)-C(56)    | 118(4)    |
| C(68)-C(67)-N(1)     | 120       |
| C(68)-C(67)-H(67)    | 120       |
| N(1)-C(67)-H(67)     | 120       |
| C(67)-C(68)-C(69)    | 120       |
| C(67)-C(68)-H(68)    | 120       |
| C(69)-C(68)-H(68)    | 120       |
| C(70)-C(69)-C(68)    | 120       |
| C(70)-C(69)-C(11)#1  | 120(2)    |
| C(68)-C(69)-C(11)#1  | 119(2)    |
| C(69)-C(70)-C(71)    | 120       |
| C(69)-C(70)-H(70)    | 120       |
| C(71)-C(70)-H(70)    | 120       |
| N(1)-C(71)-C(70)     | 120       |
| N(1)-C(71)-H(71)     | 120       |
| C(70)-C(71)-H(71)    | 120       |
| C(71)-N(1)-C(67)     | 120       |
| C(71)-N(1)-Pt(2)     | 116.1(13) |
| C(67)-N(1)-Pt(2)     | 121.7(14) |
| C(120)-C(74)-P(4)    | 110(3)    |
| C(120)-C(74)-H(74A)  | 108.8     |
| P(4)-C(74)-H(74A)    | 109.7     |
| C(120)-C(74)-H(74B)  | 110.4     |
| P(4)-C(74)-H(74B)    | 109.9     |
| H(74A)-C(74)-H(74B)  | 108.3     |
| C(45)-C(73)-H(73A)   | 120       |
| C(45)-C(73)-H(73B)   | 120       |
| H(73A)-C(73)-H(73B)  | 120       |
| C(109)-C(108)-H(10A) | 110.7     |
| C(109)-C(108)-H(10B) | 110       |
| H(10A)-C(108)-H(10B) | 108.8     |
| C(109)-C(108)-H(10C) | 109.8     |

|                      |        |
|----------------------|--------|
| H(10A)-C(108)-H(10C) | 108.7  |
| H(10B)-C(108)-H(10C) | 108.8  |
| C(108)-C(109)-P(3)   | 135(4) |
| C(108)-C(109)-H(10D) | 103.6  |
| P(3)-C(109)-H(10D)   | 103.4  |
| C(108)-C(109)-H(10E) | 102.8  |
| P(3)-C(109)-H(10E)   | 103.4  |
| H(10D)-C(109)-H(10E) | 105.2  |
| C(43)-C(110)-H(11A)  | 112    |
| C(43)-C(110)-H(11B)  | 112.1  |
| H(11A)-C(110)-H(11B) | 106.7  |
| C(43)-C(110)-H(11C)  | 112.3  |
| H(11A)-C(110)-H(11C) | 106.8  |
| H(11B)-C(110)-H(11C) | 106.7  |
| C(113)-C(112)-P(1)   | 103(4) |
| C(113)-C(112)-H(11D) | 111.3  |
| P(1)-C(112)-H(11D)   | 111.2  |
| C(113)-C(112)-H(11E) | 110.8  |
| P(1)-C(112)-H(11E)   | 111.1  |
| H(11D)-C(112)-H(11E) | 109.1  |
| C(112)-C(113)-H(11F) | 115.1  |
| C(112)-C(113)-H(11G) | 114.8  |
| H(11F)-C(113)-H(11G) | 103.7  |
| C(112)-C(113)-H(11H) | 114.4  |
| H(11F)-C(113)-H(11H) | 103.6  |
| H(11G)-C(113)-H(11H) | 103.8  |
| C(116)-C(114)-P(2)   | 104(2) |
| C(116)-C(114)-H(11I) | 111    |
| P(2)-C(114)-H(11I)   | 110.9  |
| C(116)-C(114)-H(11J) | 110.9  |
| P(2)-C(114)-H(11J)   | 110.8  |
| H(11I)-C(114)-H(11J) | 108.9  |
| C(46)-C(115)-P(2)    | 105(4) |
| C(46)-C(115)-H(11K)  | 110.7  |
| P(2)-C(115)-H(11K)   | 110.7  |
| C(46)-C(115)-H(11L)  | 111    |
| P(2)-C(115)-H(11L)   | 111    |
| H(11K)-C(115)-H(11L) | 108.9  |
| C(114)-C(116)-H(11M) | 110.6  |
| C(114)-C(116)-H(11N) | 110.5  |
| H(11M)-C(116)-H(11N) | 108.5  |
| C(114)-C(116)-H(11O) | 110.3  |
| H(11M)-C(116)-H(11O) | 108.4  |

|                      |        |
|----------------------|--------|
| H(11N)-C(116)-H(11O) | 108.5  |
| C(23)-C(117)-P(4)    | 92(6)  |
| C(23)-C(117)-H(11P)  | 113.4  |
| P(4)-C(117)-H(11P)   | 113.3  |
| C(23)-C(117)-H(11Q)  | 112.9  |
| P(4)-C(117)-H(11Q)   | 113.3  |
| H(11P)-C(117)-H(11Q) | 110.7  |
| C(119)-C(118)-P(4)   | 112(3) |
| C(119)-C(118)-H(11R) | 109    |
| P(4)-C(118)-H(11R)   | 109.1  |
| C(119)-C(118)-H(11S) | 109.4  |
| P(4)-C(118)-H(11S)   | 109.2  |
| H(11R)-C(118)-H(11S) | 107.9  |
| C(118)-C(119)-H(11T) | 110.7  |
| C(118)-C(119)-H(11U) | 111.1  |
| H(11T)-C(119)-H(11U) | 107.9  |
| C(118)-C(119)-H(11V) | 110.9  |
| H(11T)-C(119)-H(11V) | 108    |
| H(11U)-C(119)-H(11V) | 108    |
| C(74)-C(120)-H(12A)  | 122.2  |
| C(74)-C(120)-H(12B)  | 123.9  |
| H(12A)-C(120)-H(12B) | 92.5   |
| C(74)-C(120)-H(12C)  | 124.8  |
| H(12A)-C(120)-H(12C) | 92.8   |
| H(12B)-C(120)-H(12C) | 91.5   |
| O(3S)-S(1S)-O(2S)    | 116(3) |
| O(3S)-S(1S)-O(1S)    | 114(3) |
| O(2S)-S(1S)-O(1S)    | 113(3) |
| O(3S)-S(1S)-C(1S)    | 107(3) |
| O(2S)-S(1S)-C(1S)    | 102(3) |
| O(1S)-S(1S)-C(1S)    | 103(3) |
| F(1S)-C(1S)-F(2S)    | 104(4) |
| F(1S)-C(1S)-F(3S)    | 103(4) |
| F(2S)-C(1S)-F(3S)    | 102(4) |
| F(1S)-C(1S)-S(1S)    | 117(3) |
| F(2S)-C(1S)-S(1S)    | 115(3) |
| F(3S)-C(1S)-S(1S)    | 115(3) |
| O(4S)-S(2S)-O(5S)    | 115(3) |
| O(4S)-S(2S)-O(6S)    | 113(3) |
| O(5S)-S(2S)-O(6S)    | 113(3) |
| O(4S)-S(2S)-C(2S)    | 107(3) |
| O(5S)-S(2S)-C(2S)    | 105(3) |
| O(6S)-S(2S)-C(2S)    | 103(3) |



|                   |        |
|-------------------|--------|
| F(4S)-C(2S)-F(6S) | 101(4) |
| F(4S)-C(2S)-F(5S) | 101(4) |
| F(6S)-C(2S)-F(5S) | 100(4) |
| F(4S)-C(2S)-S(2S) | 118(3) |
| F(6S)-C(2S)-S(2S) | 118(3) |
| F(5S)-C(2S)-S(2S) | 116(3) |

---

Symmetry transformations used to generate equivalent atoms:

#1  $-x+1/2, -y+1/2, -z+1/2$

## References

- S1. S. Muratsugu, A. Yamaguchi, G. I. Yokota, T. Maeno and M. Tada, *Chem. Commun.* 2018, **54**, 4842–4845.
- S2. P. J. Stang, D. H. Cao, S. Saito and A. M. Arif, *J. Am. Chem. Soc.* 1995, **117**, 6273–6283.
- S3. Y. Shi, I. Sánchez-Molina, C. Cao, T. R. Cook and P. J. Stang, *Proc. Natl. Acad. Sci.*, 2014, **111**, 9390–9395.
- S4. (a) Thordarson, P. *Chem. Soc. Rev.* 2011, **40**, 1305-1323. (b) [www.supramolecular.org](http://www.supramolecular.org)
